# Supplementary material for: Synthesis and Evaluation on the Fungicidal Activity of S-Alkyl Substituted Thioglycolurils
Source: MDPI journal article supplement (doi:10.3390/ijms24065756), 2023-03-17

# Supplementary Information

## Table of Contents

|                                                                                     |     |
|-------------------------------------------------------------------------------------|-----|
| 1. Spectra $^1\text{H}$ and $^{13}\text{C}$ NMR of compounds <b>4a-f</b> .....      | S2  |
| 2. Spectra $^1\text{H}$ and $^{13}\text{C}$ NMR of compounds <b>5a-f</b> .....      | S14 |
| 3. Spectra $^1\text{H}$ and $^{13}\text{C}$ NMR of compounds <b>6a-h</b> .....      | S26 |
| 4. LC-MS data of compound <b>4f</b> .....                                           | S42 |
| 5. Anticancer Screening Data of 60 Cancer Cell Lines of <b>4b, 5d, 5e, 5f</b> ..... | S48 |

/KANI lav9.2

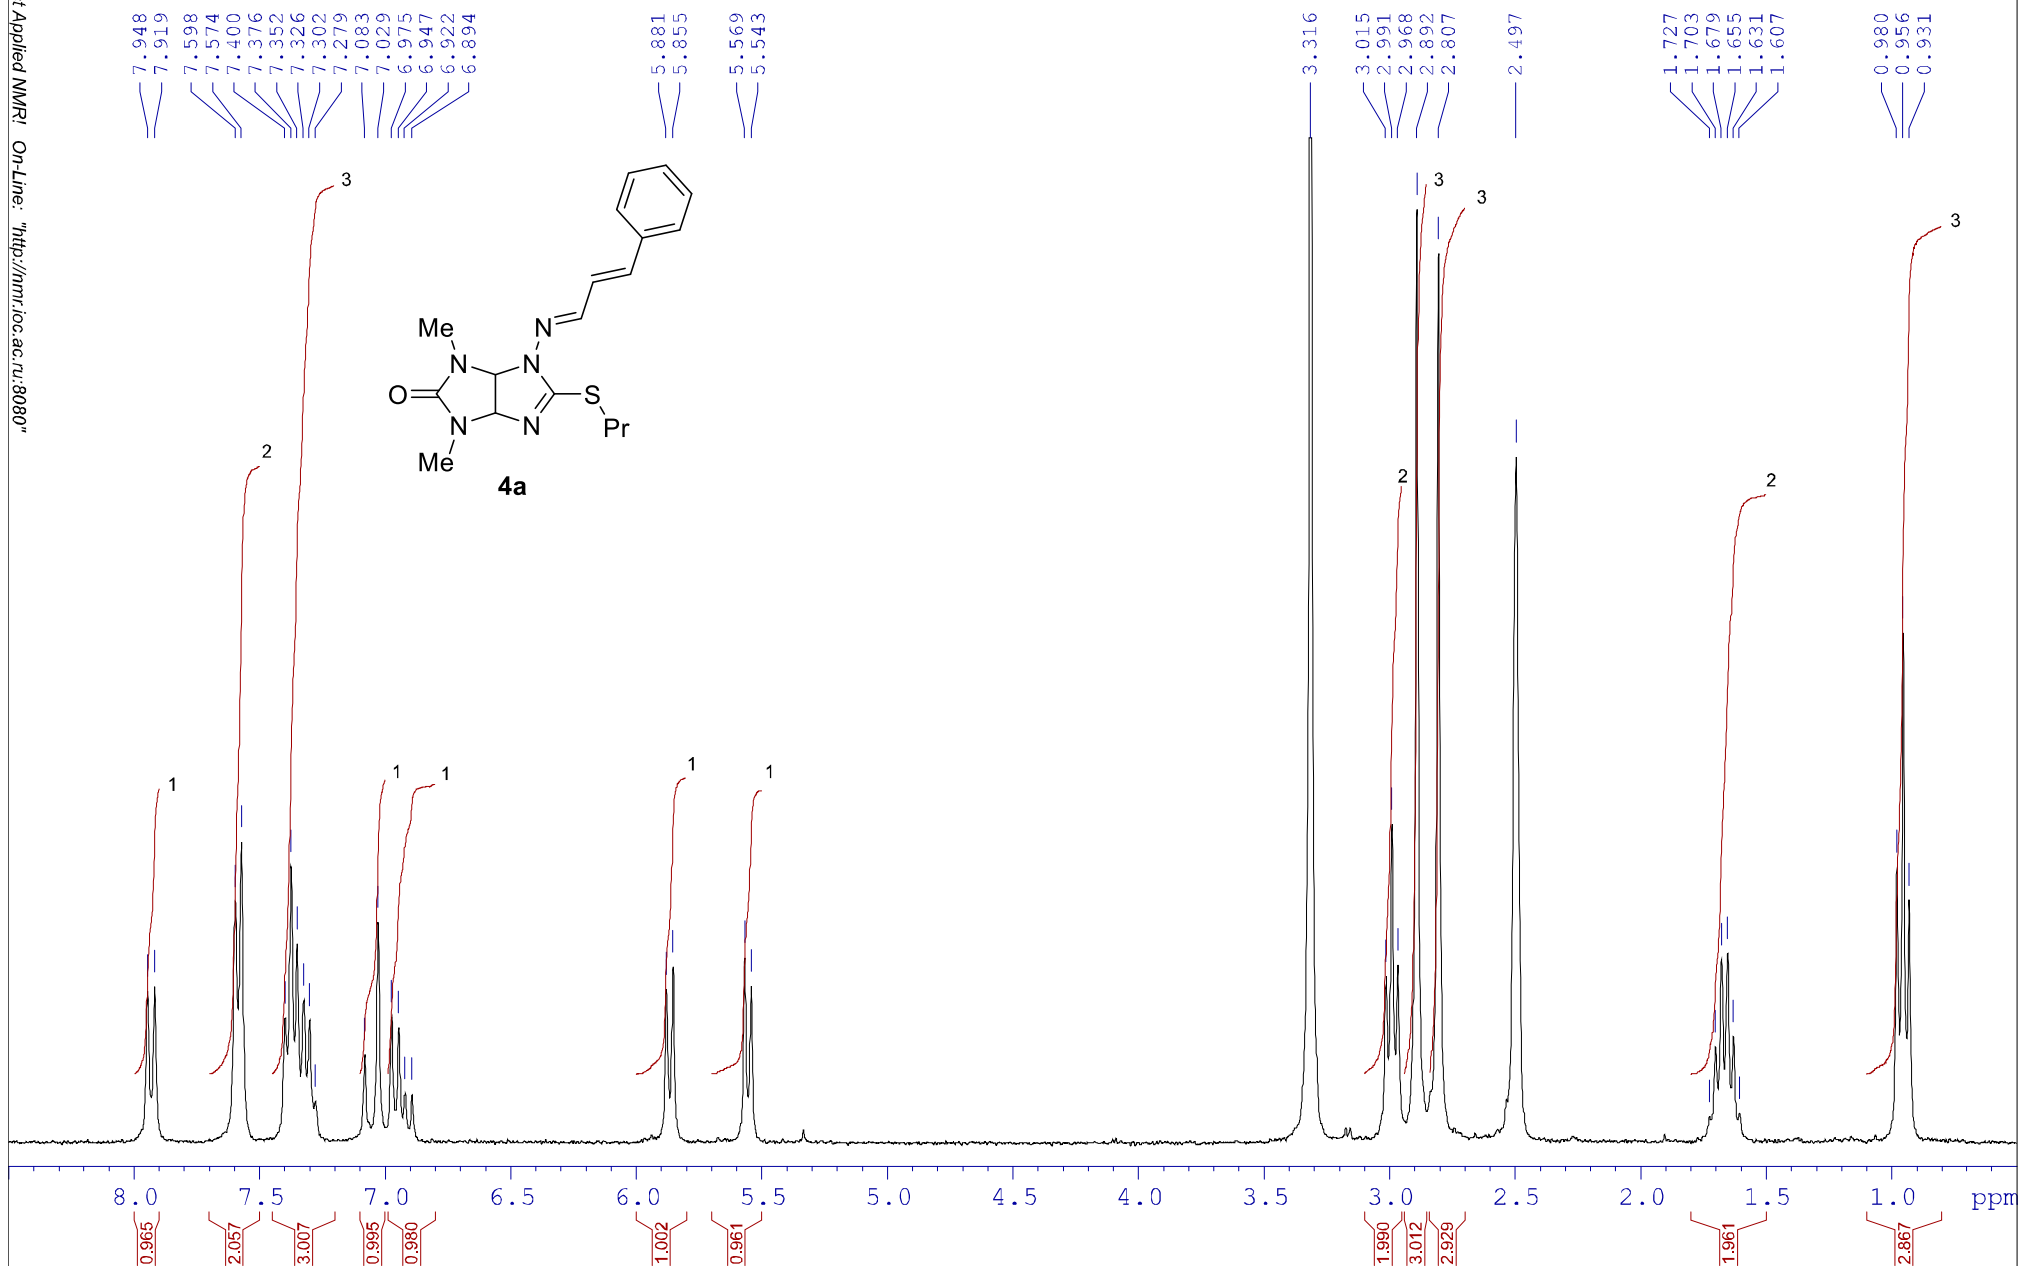

/KANI lav9.2

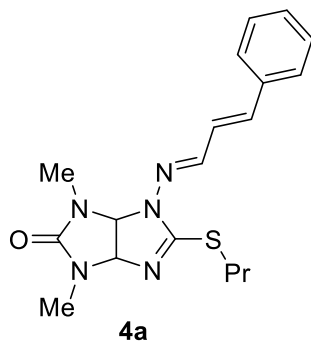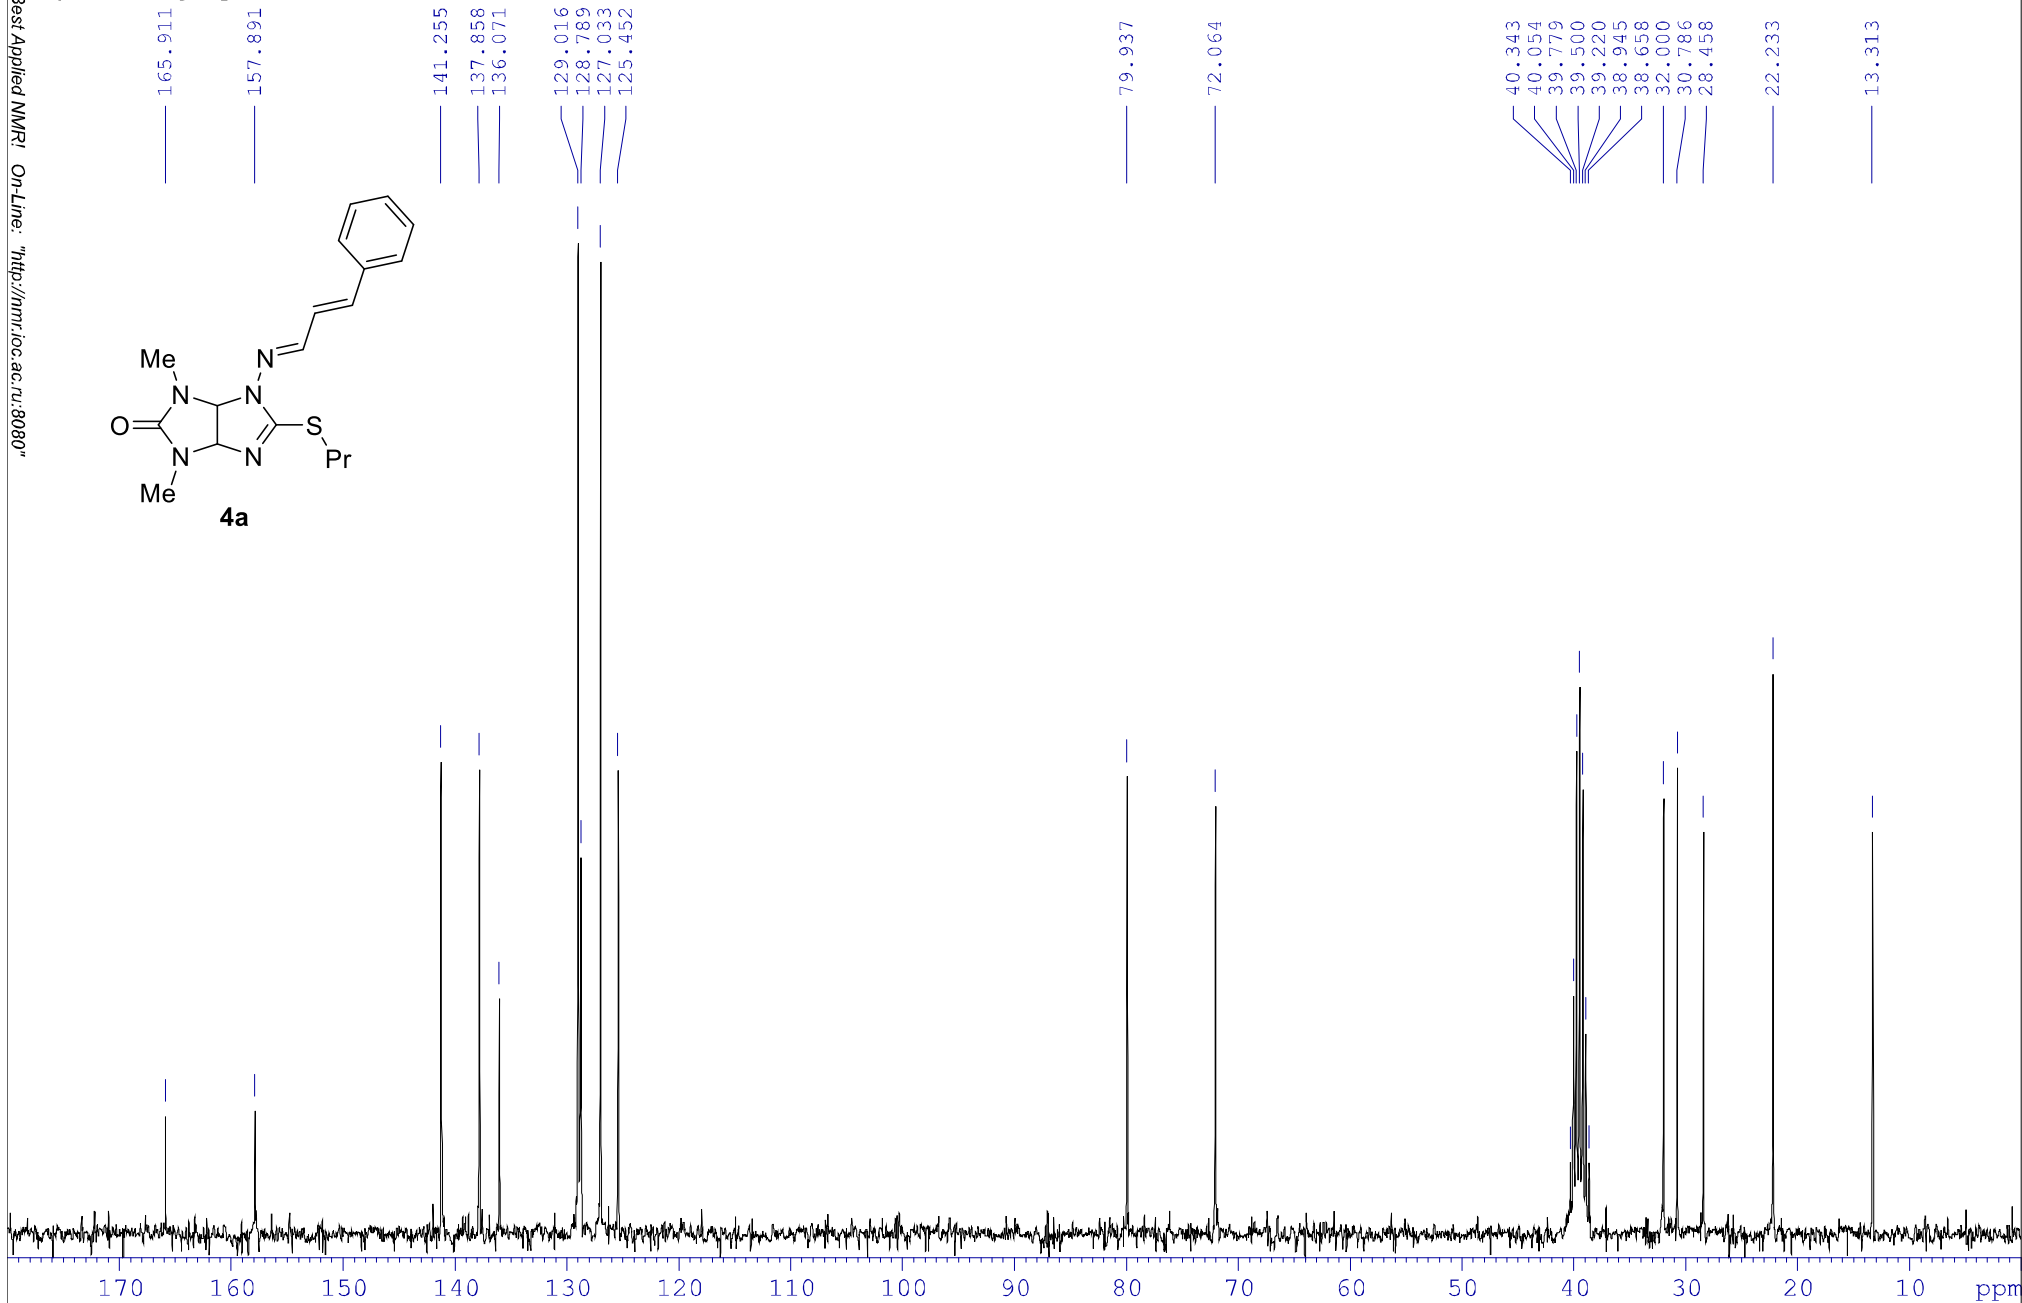

# /KANI Lav37.1cr

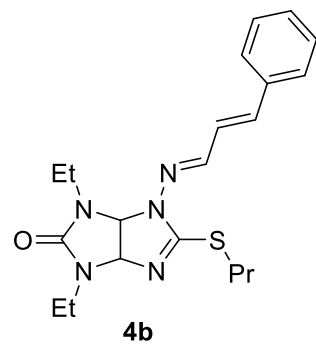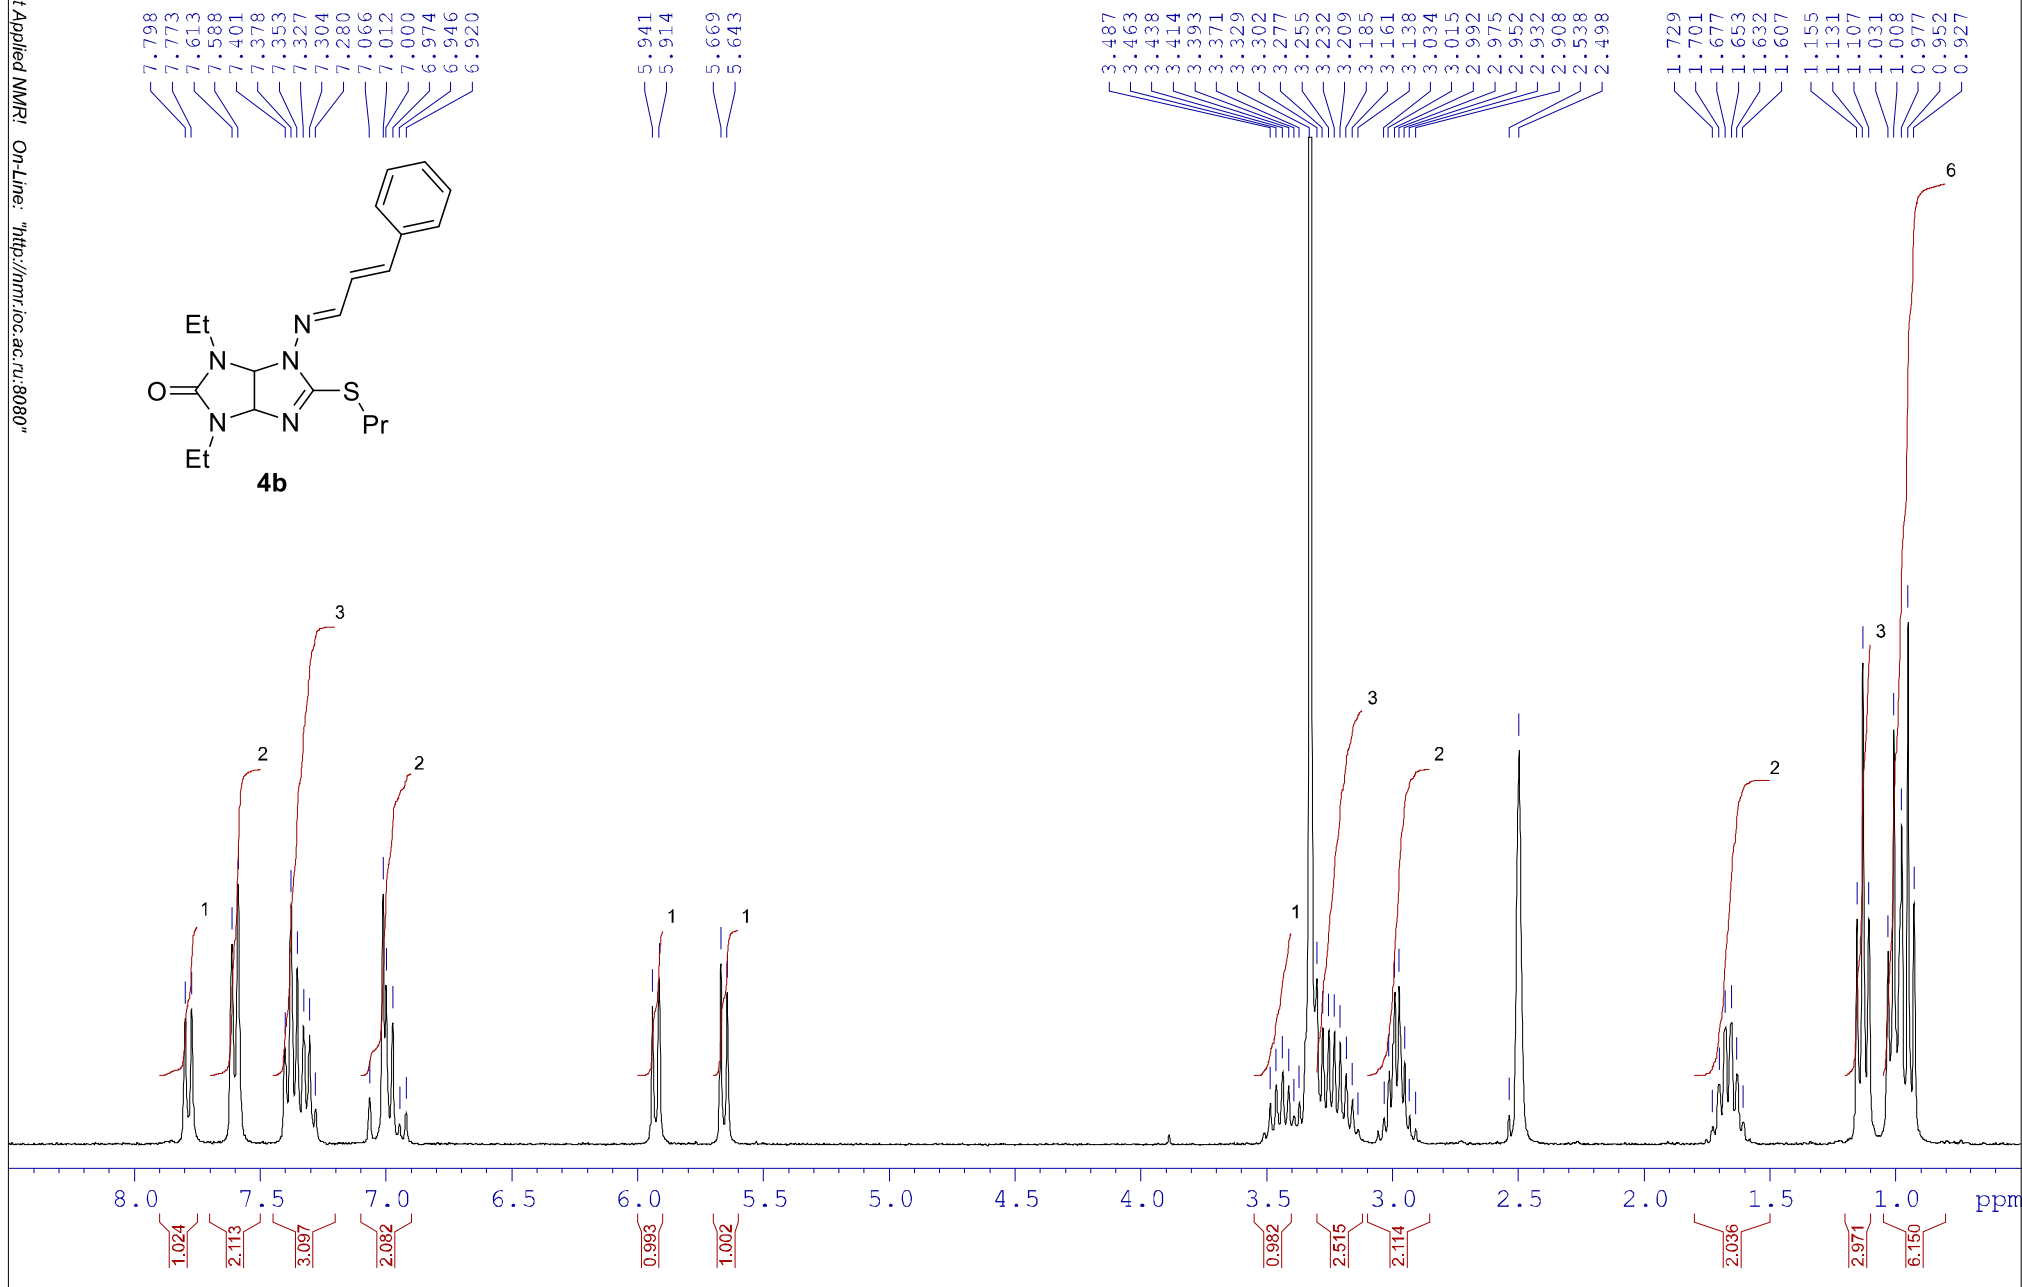

/KANI Lav37.1cr

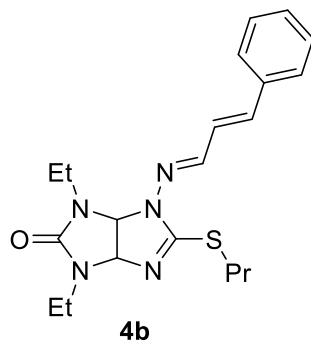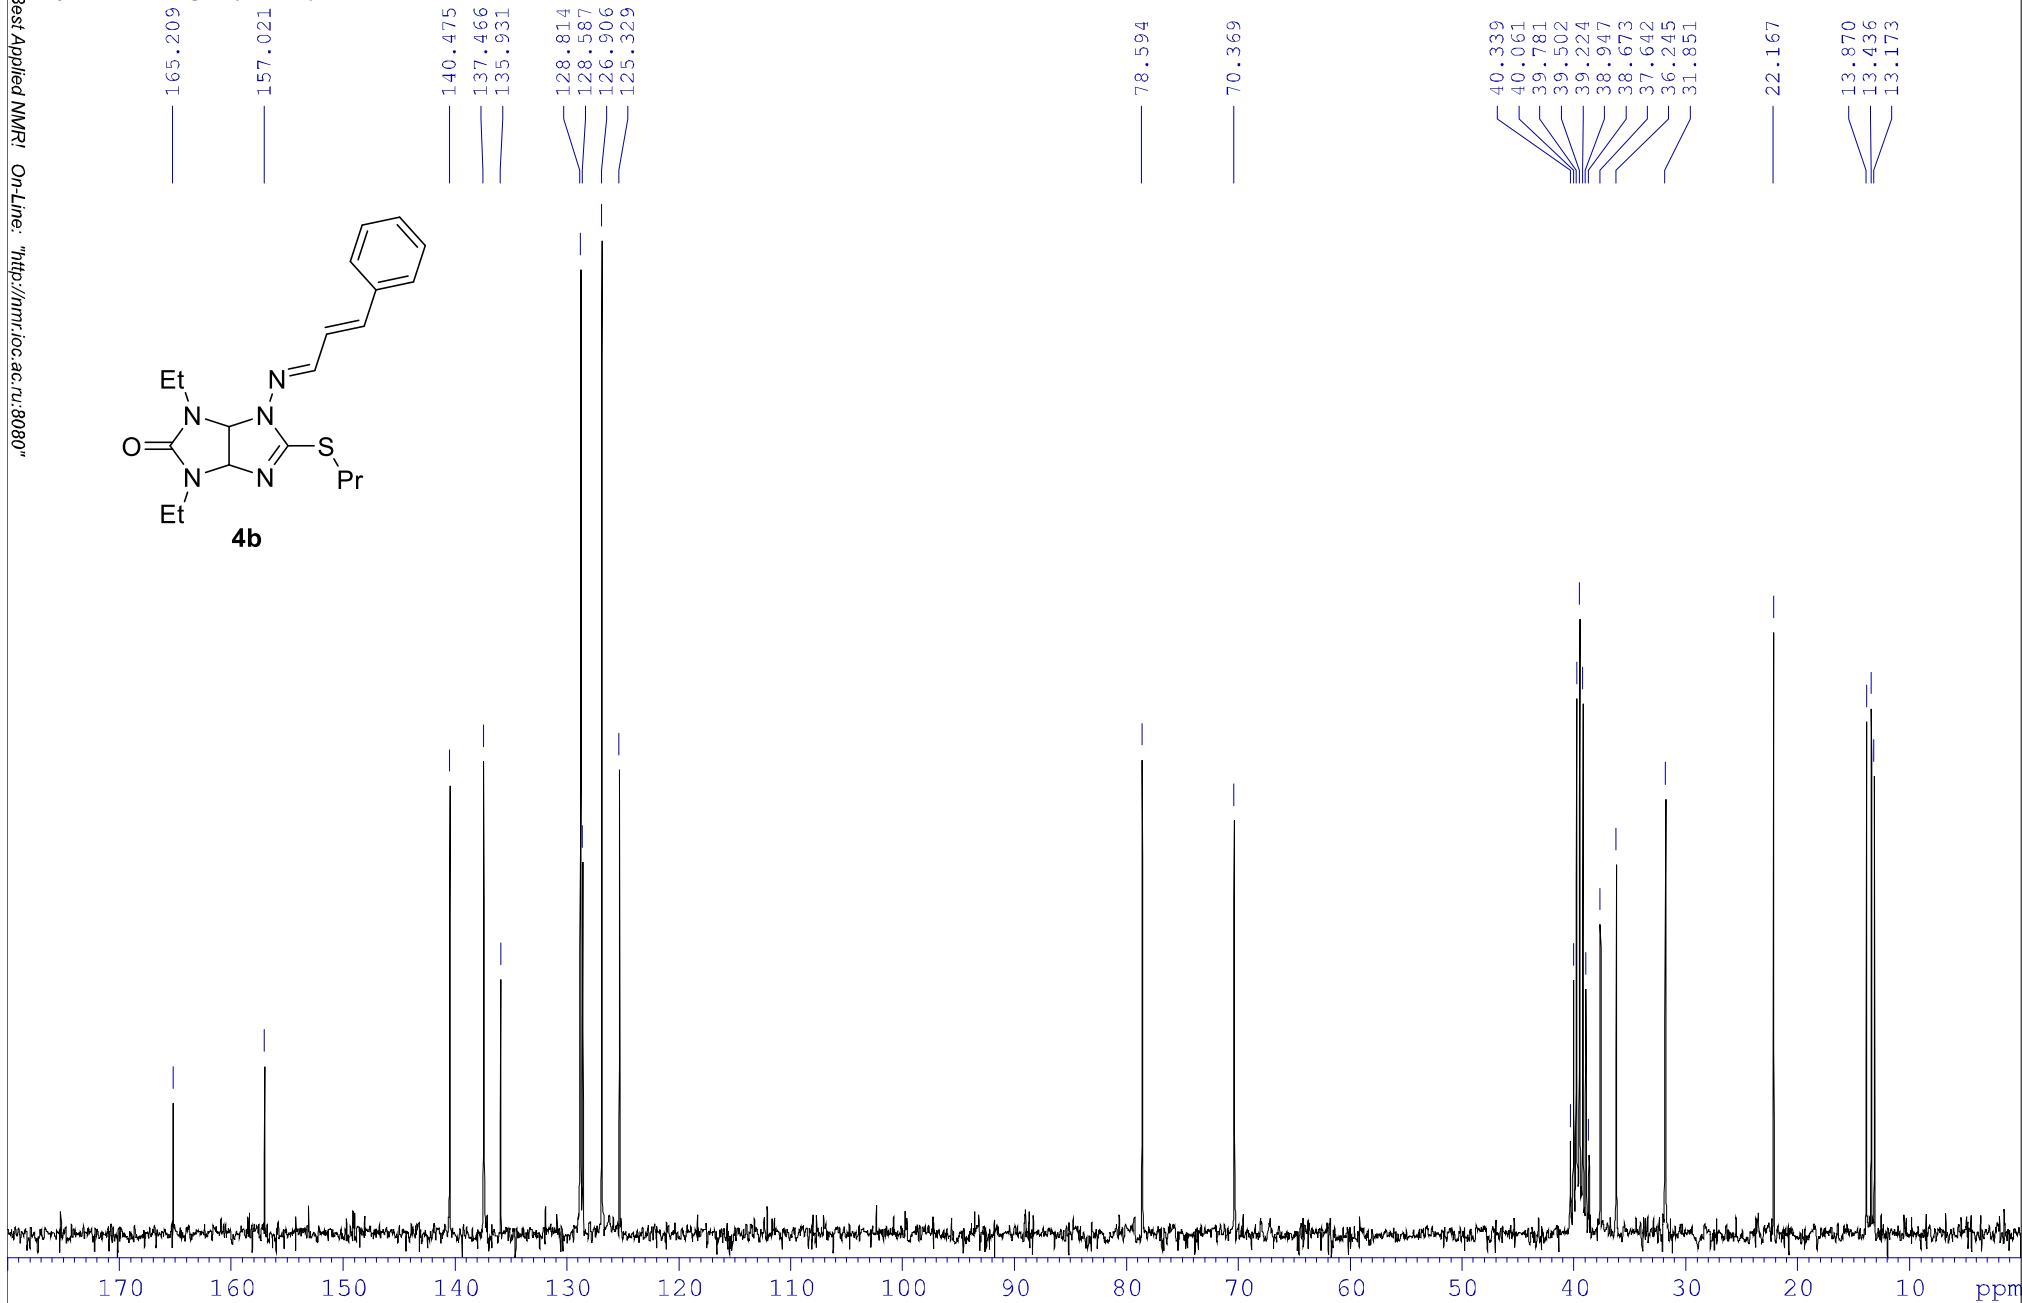

/KANI lav24cr2

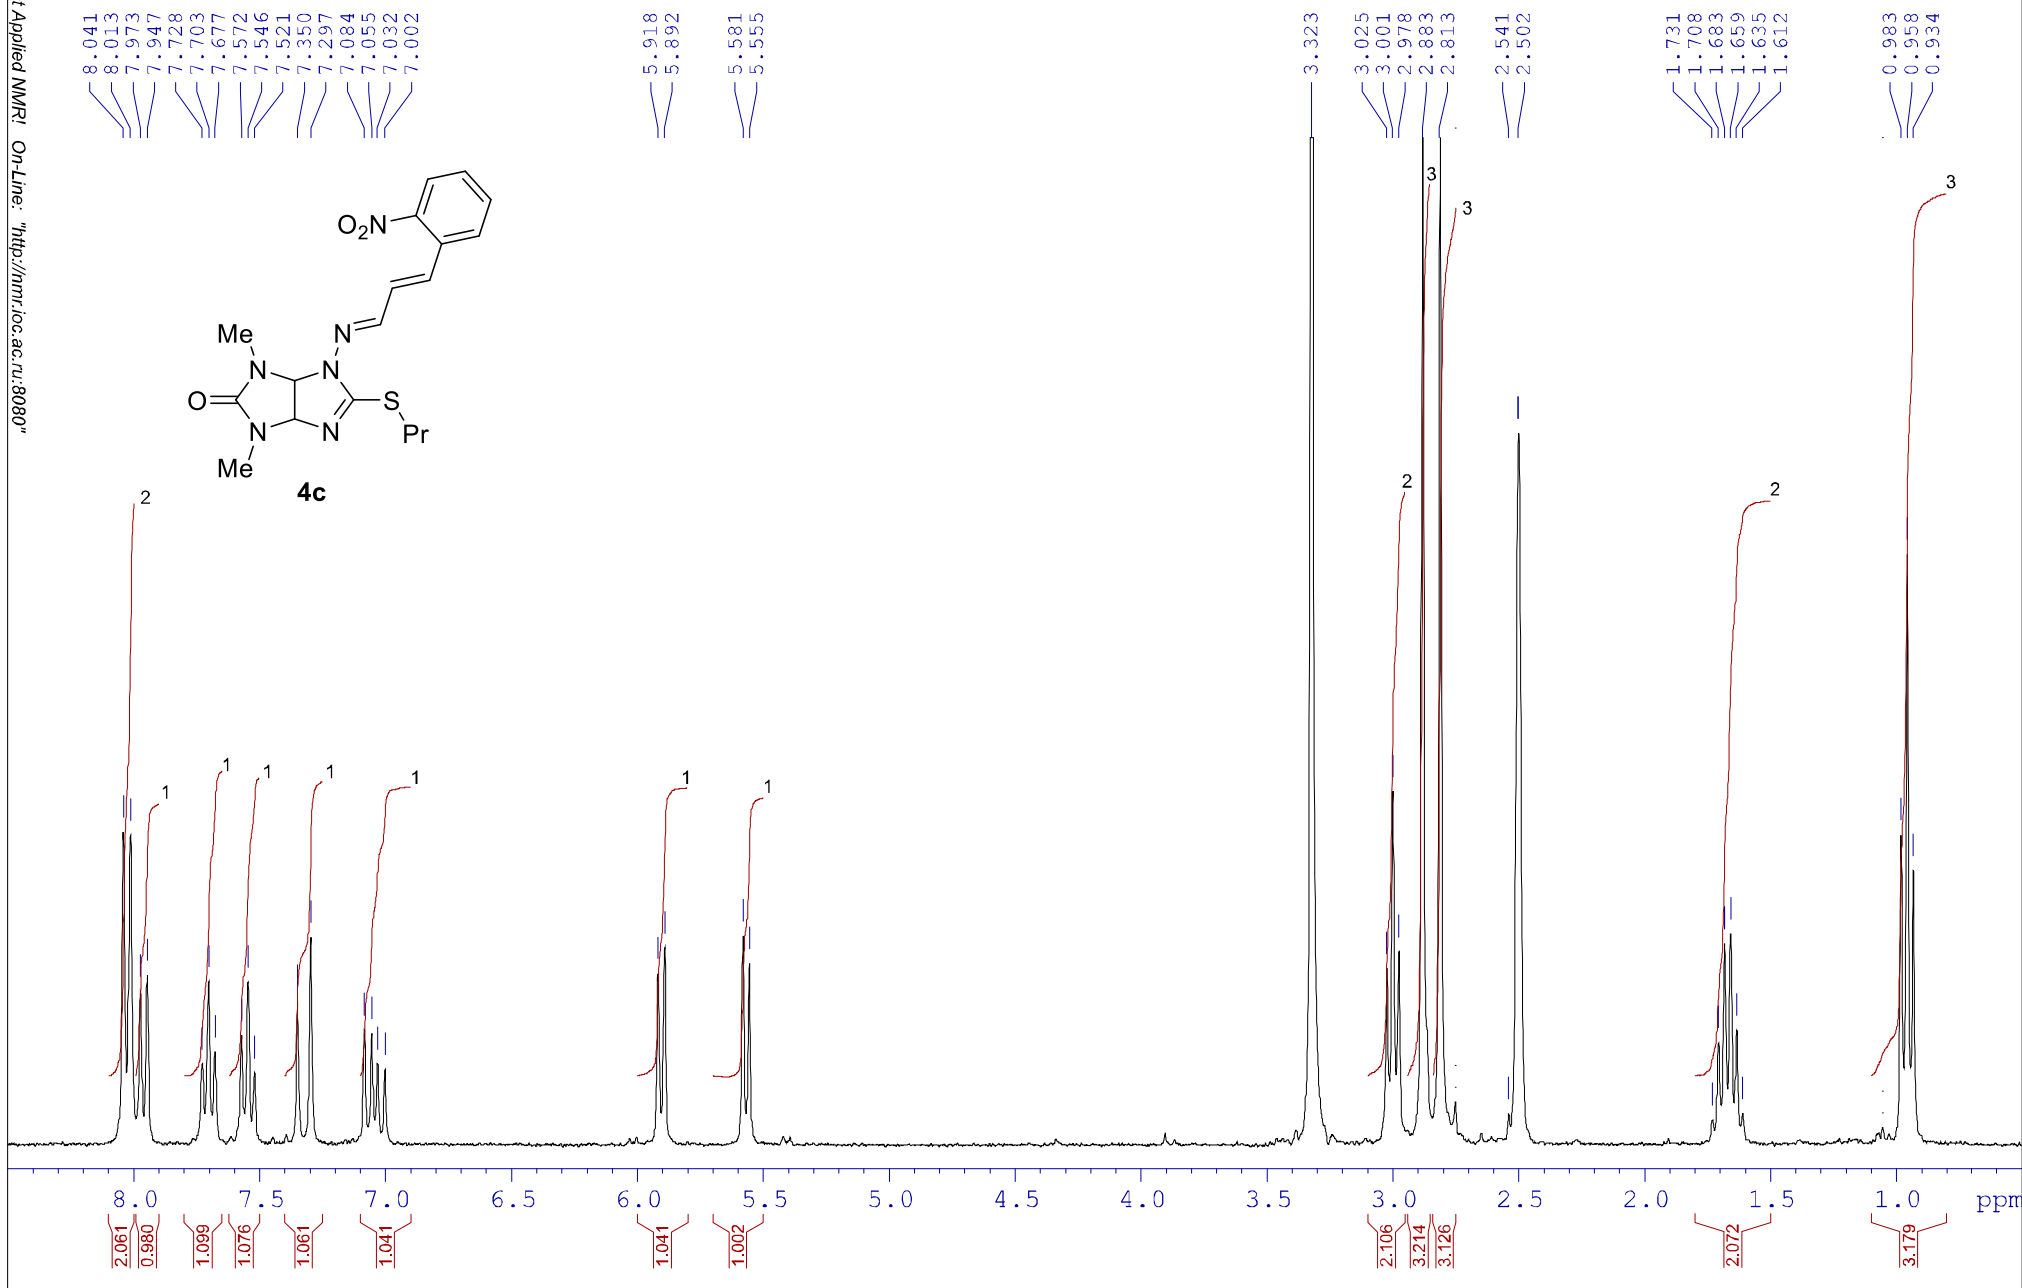

/KANI Lav24.1

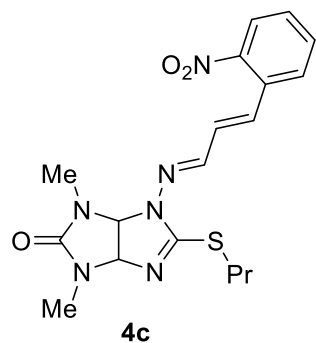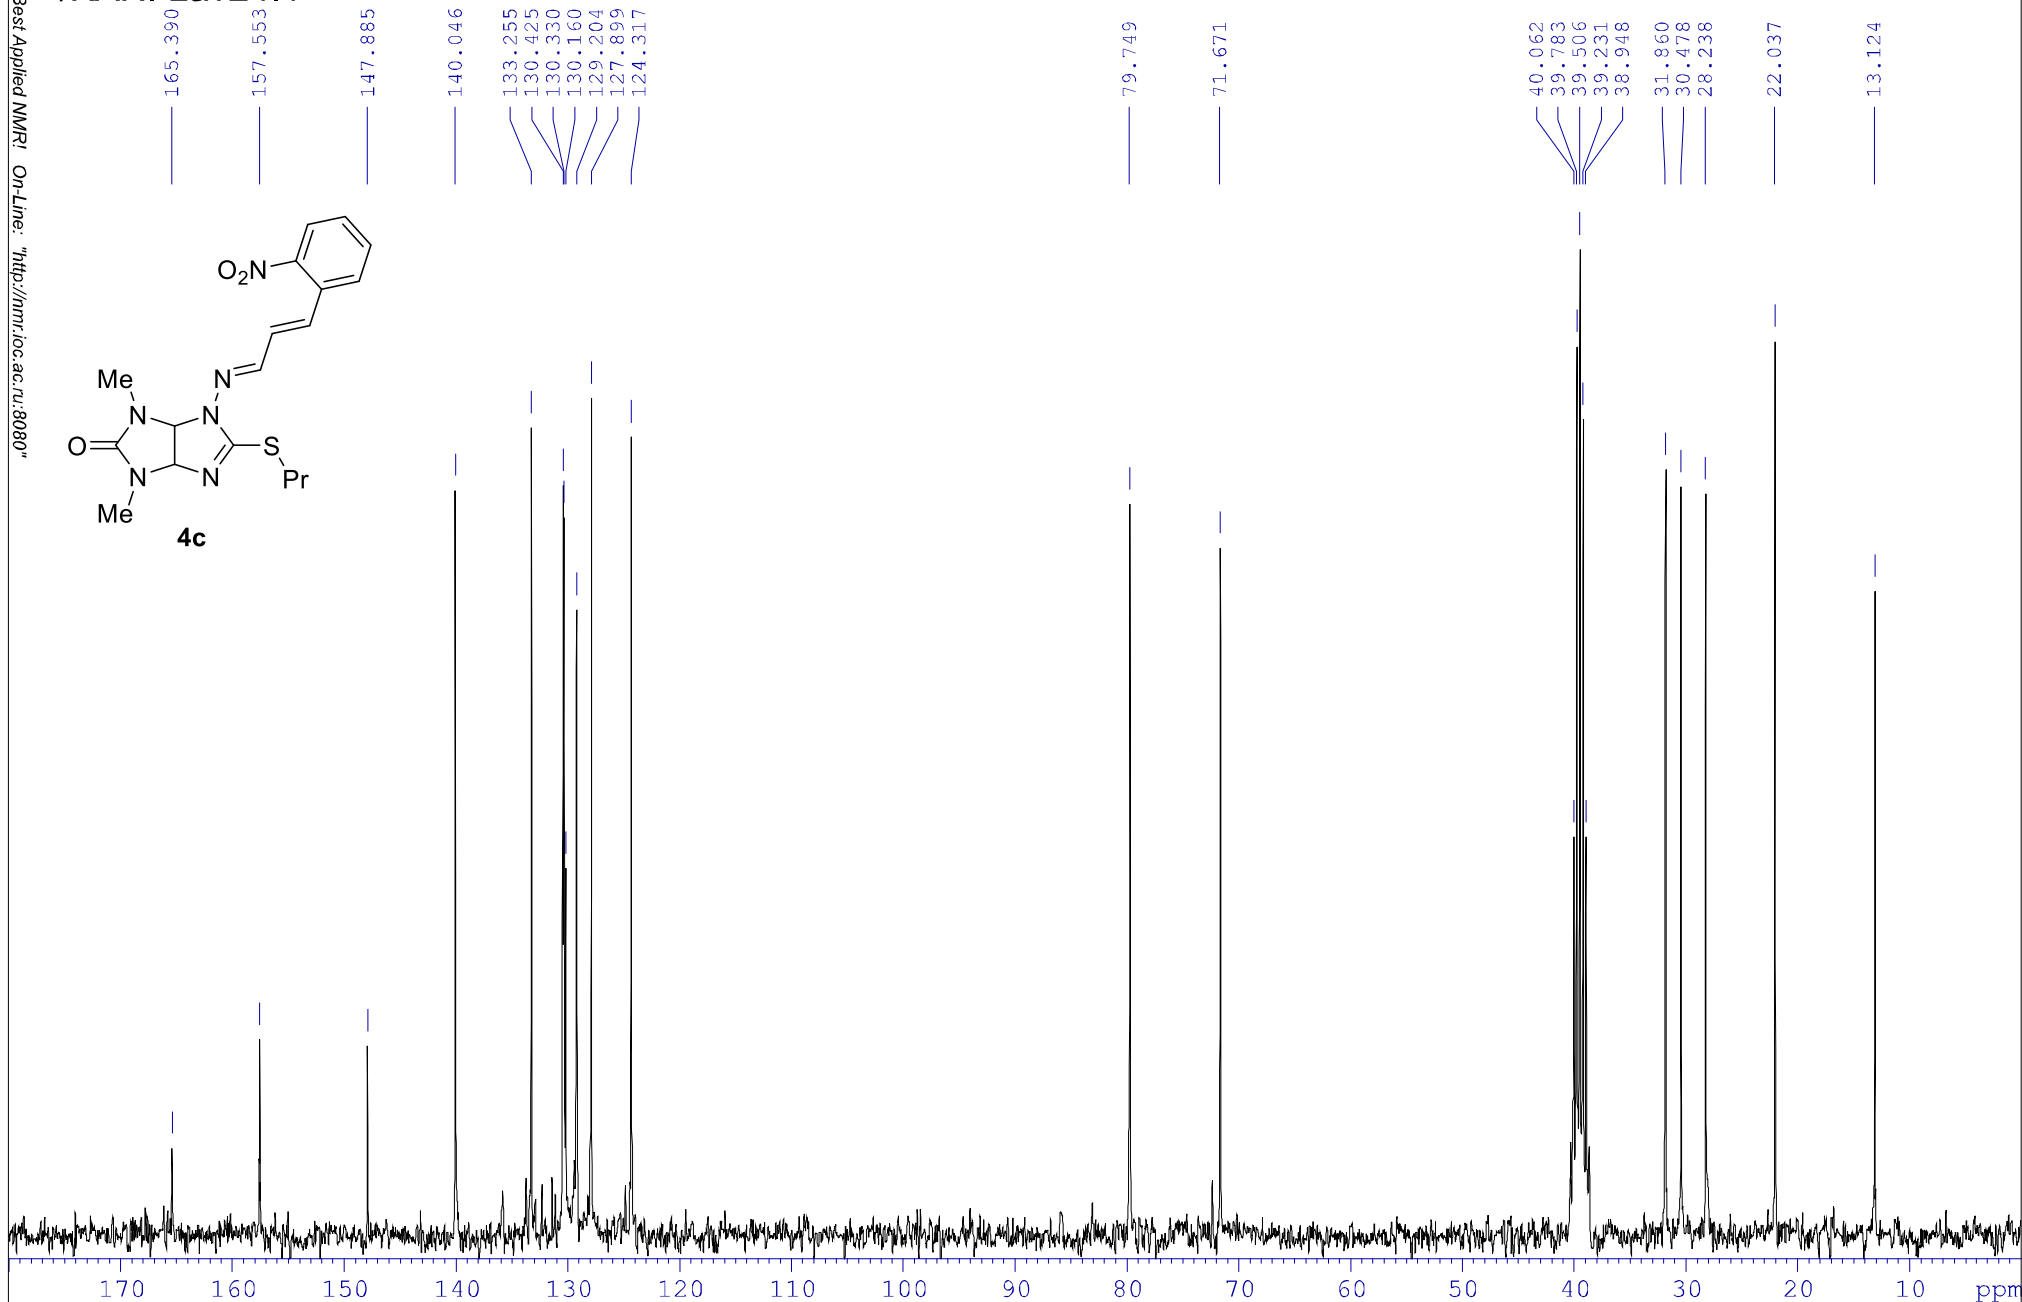

/KANI LAV8.2

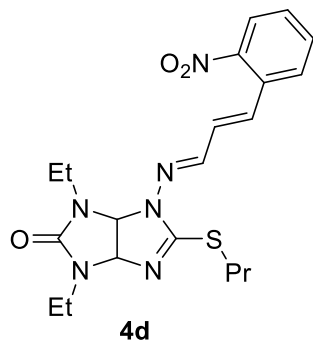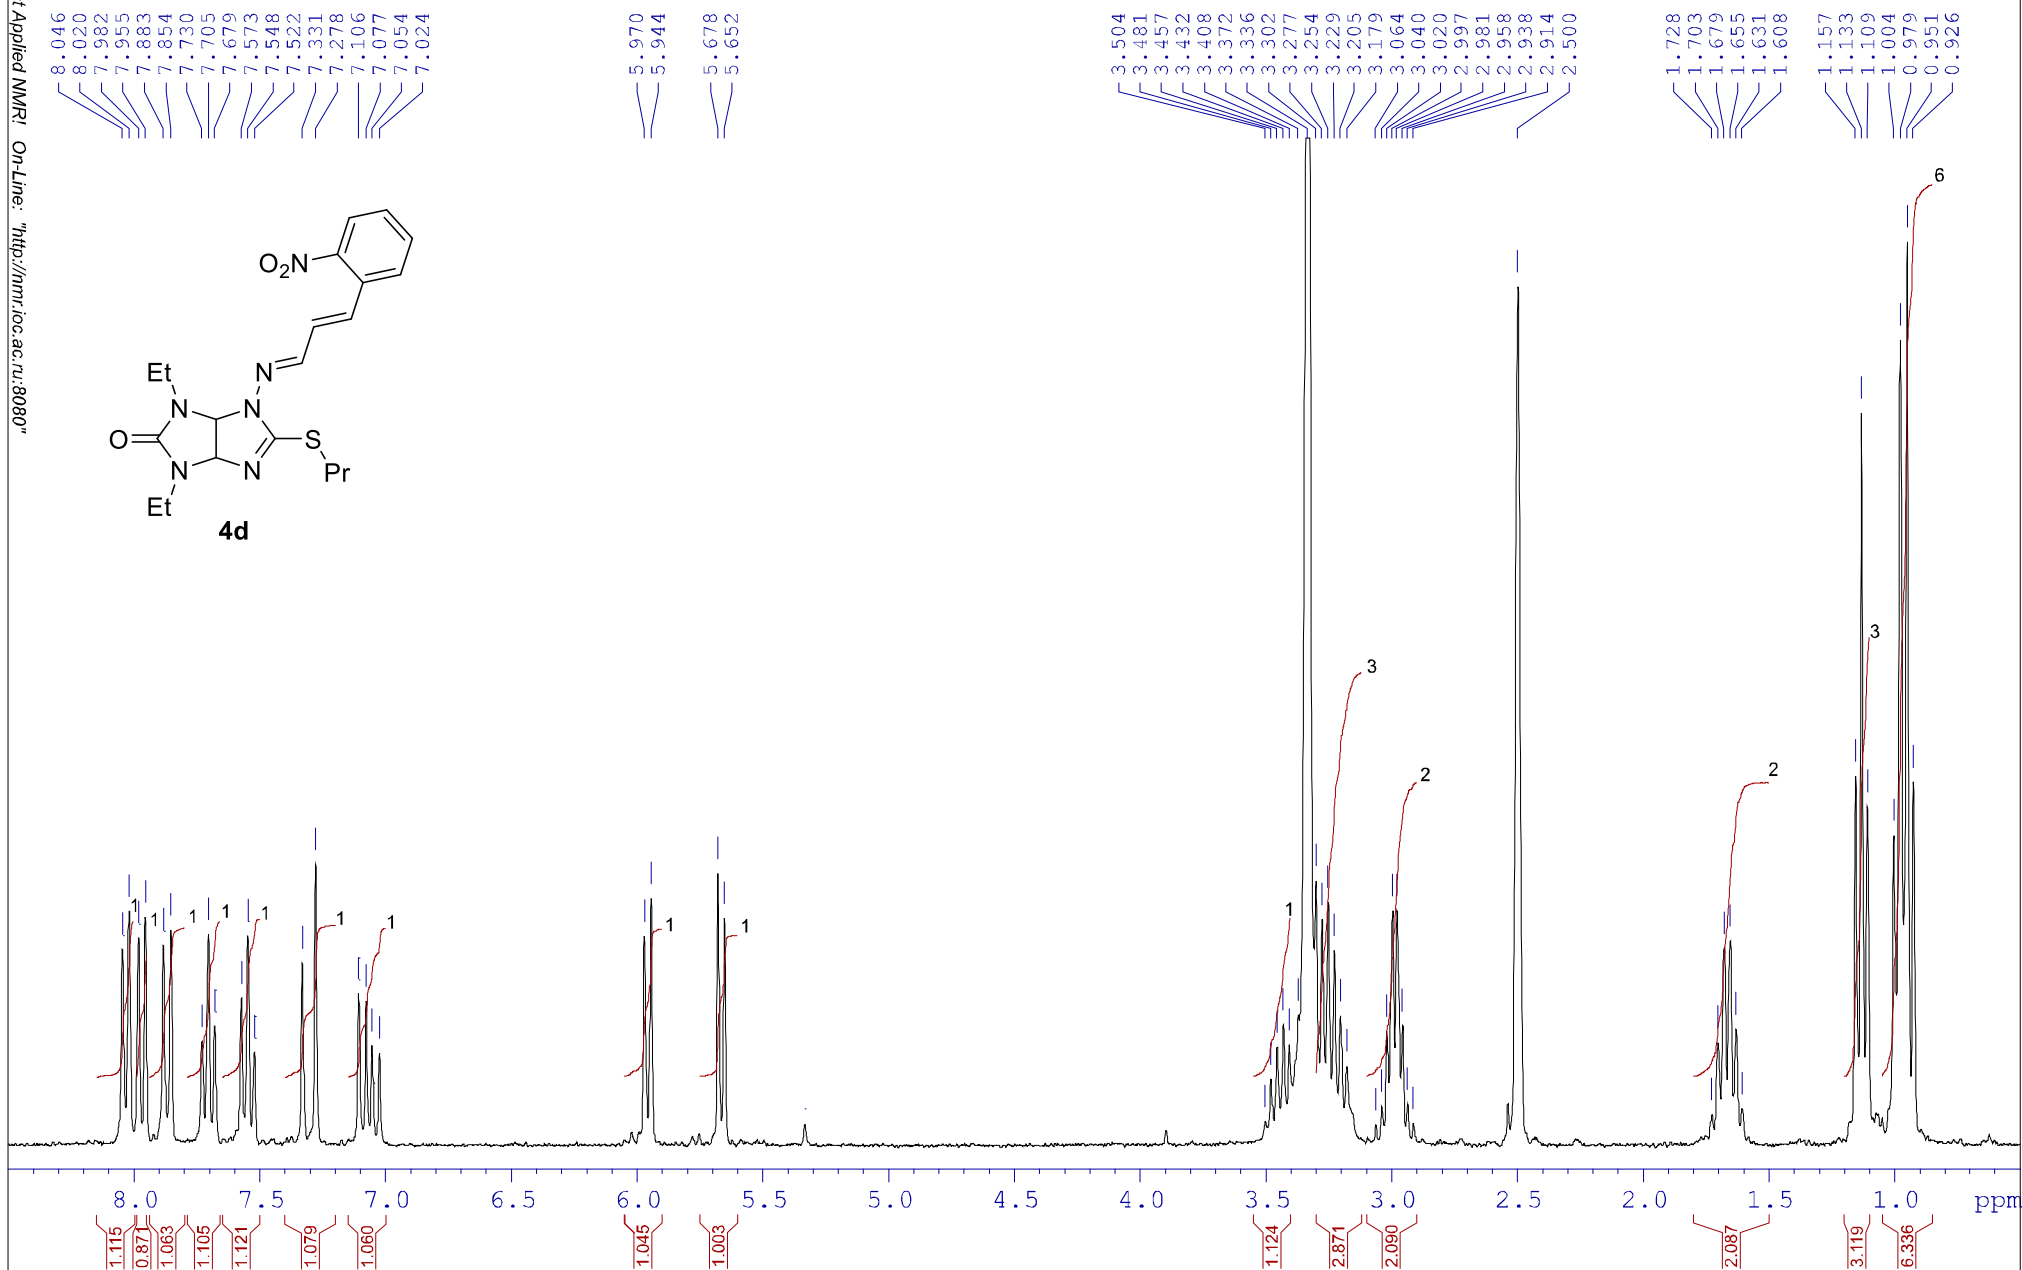



/KANI LAV8.2

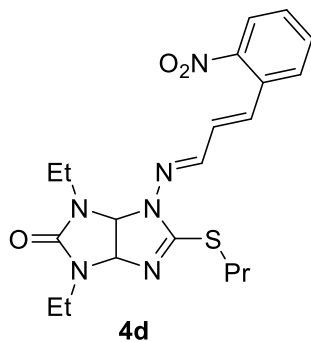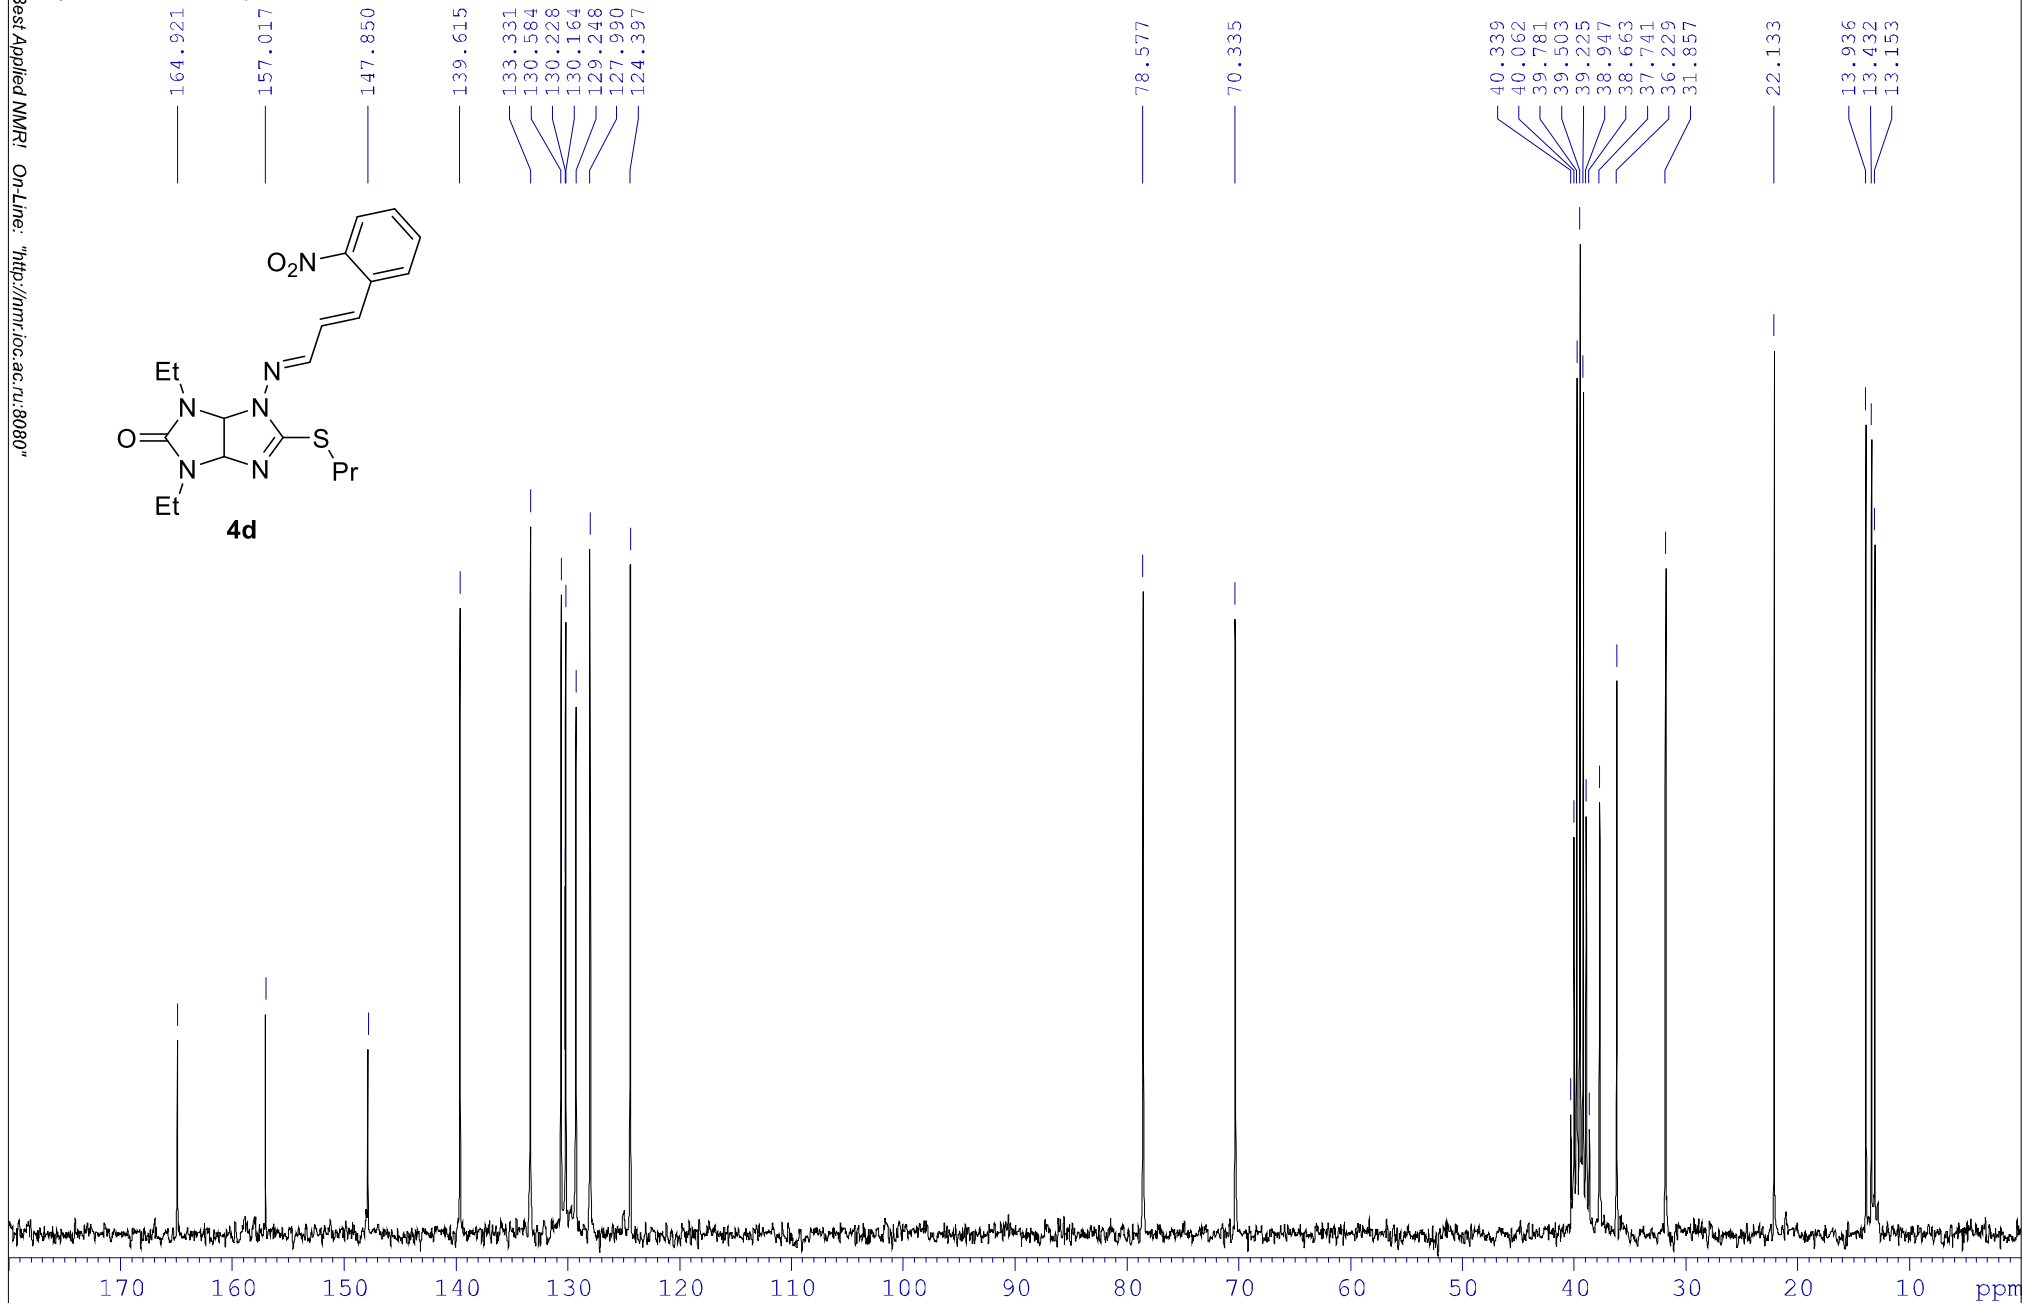

/KANI lav25.2

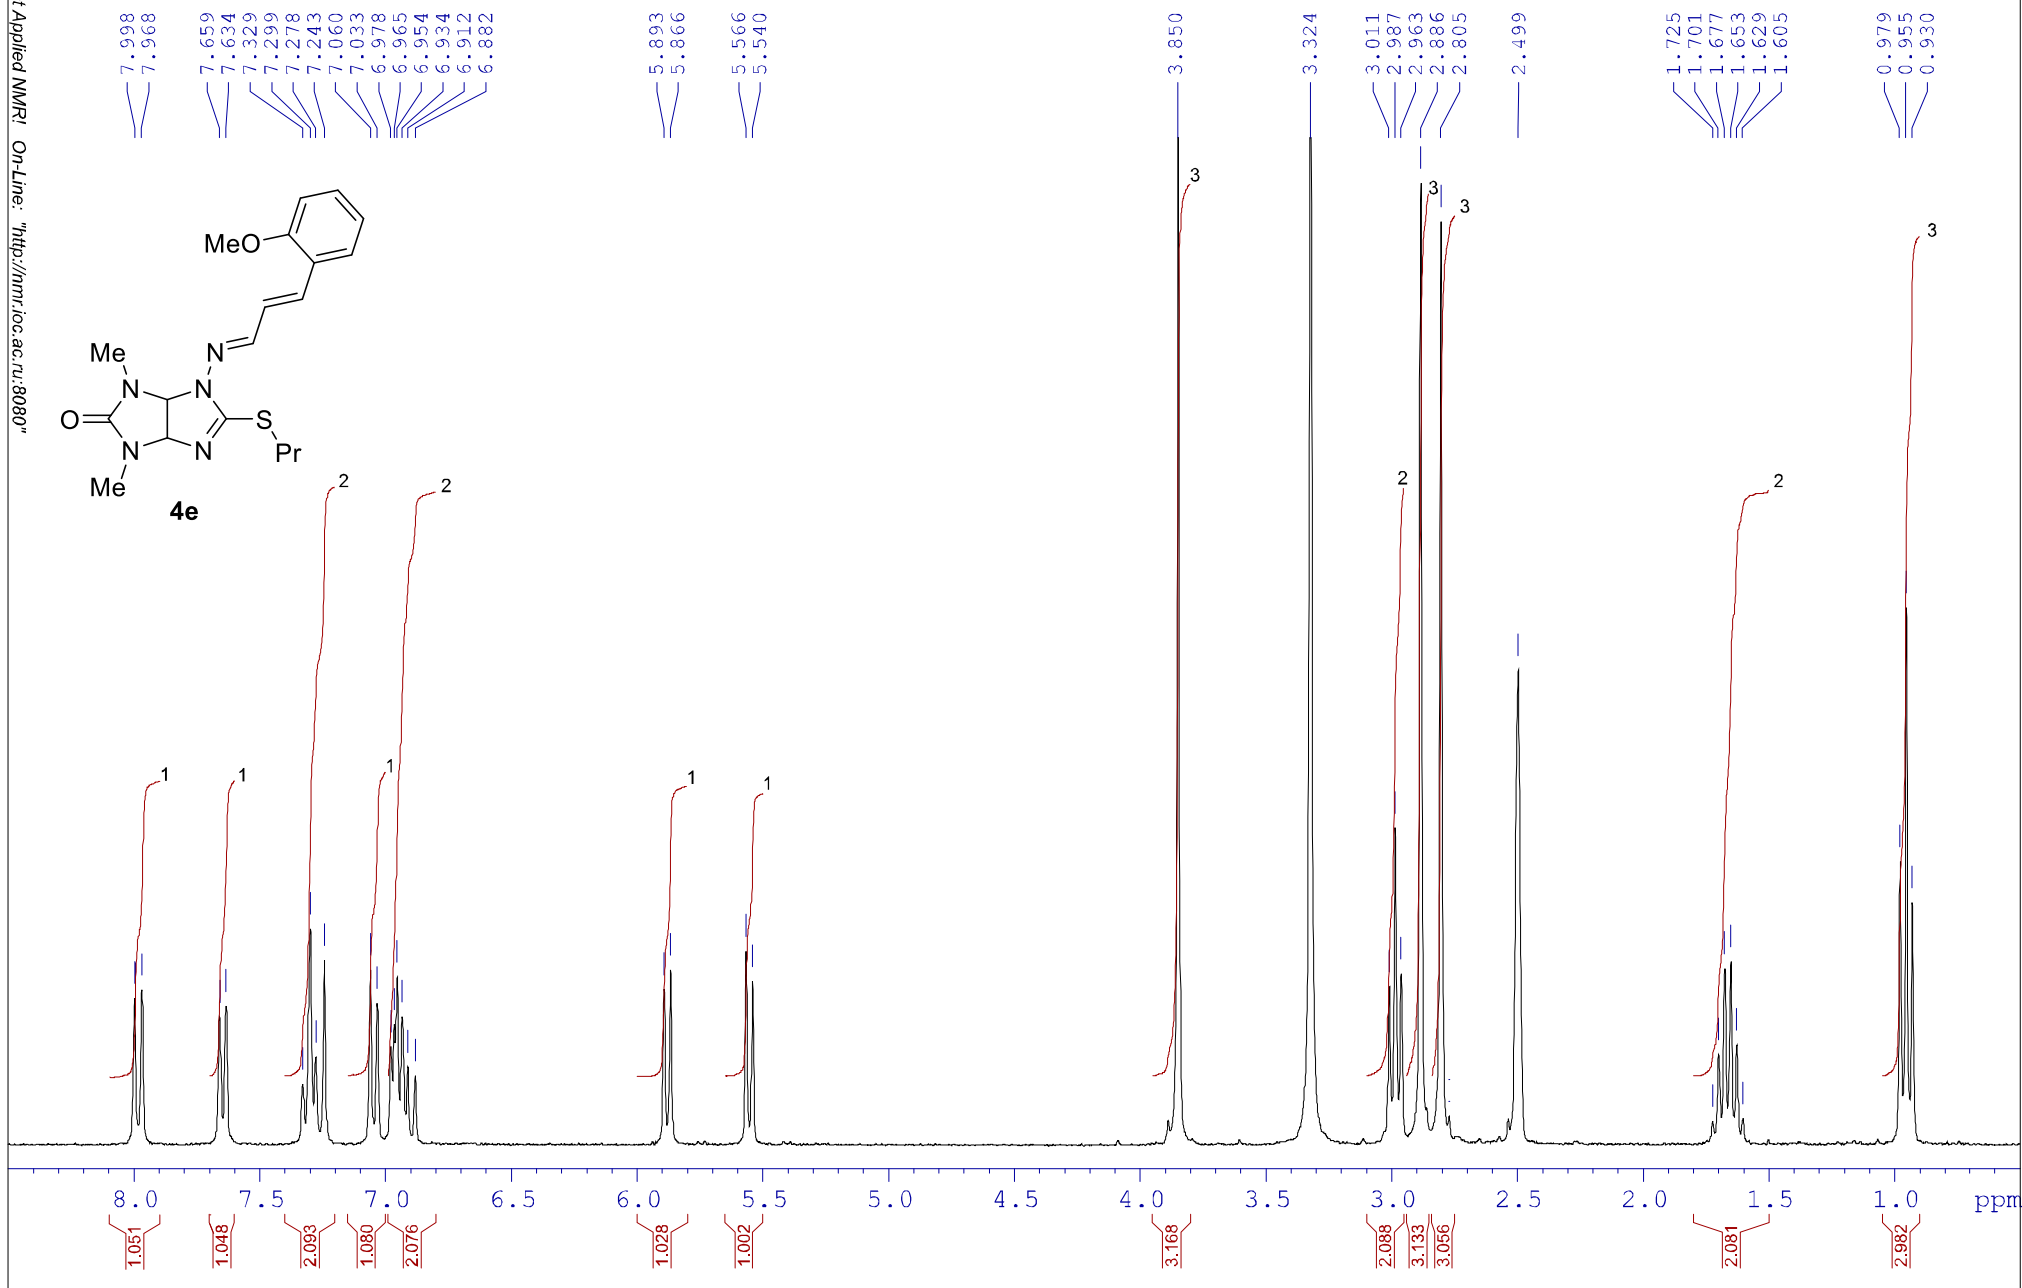

/KANI lav25.2

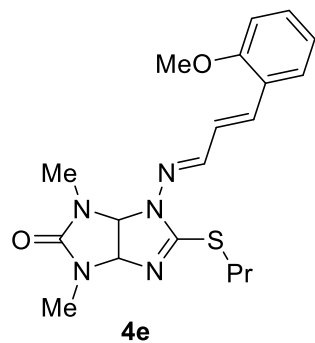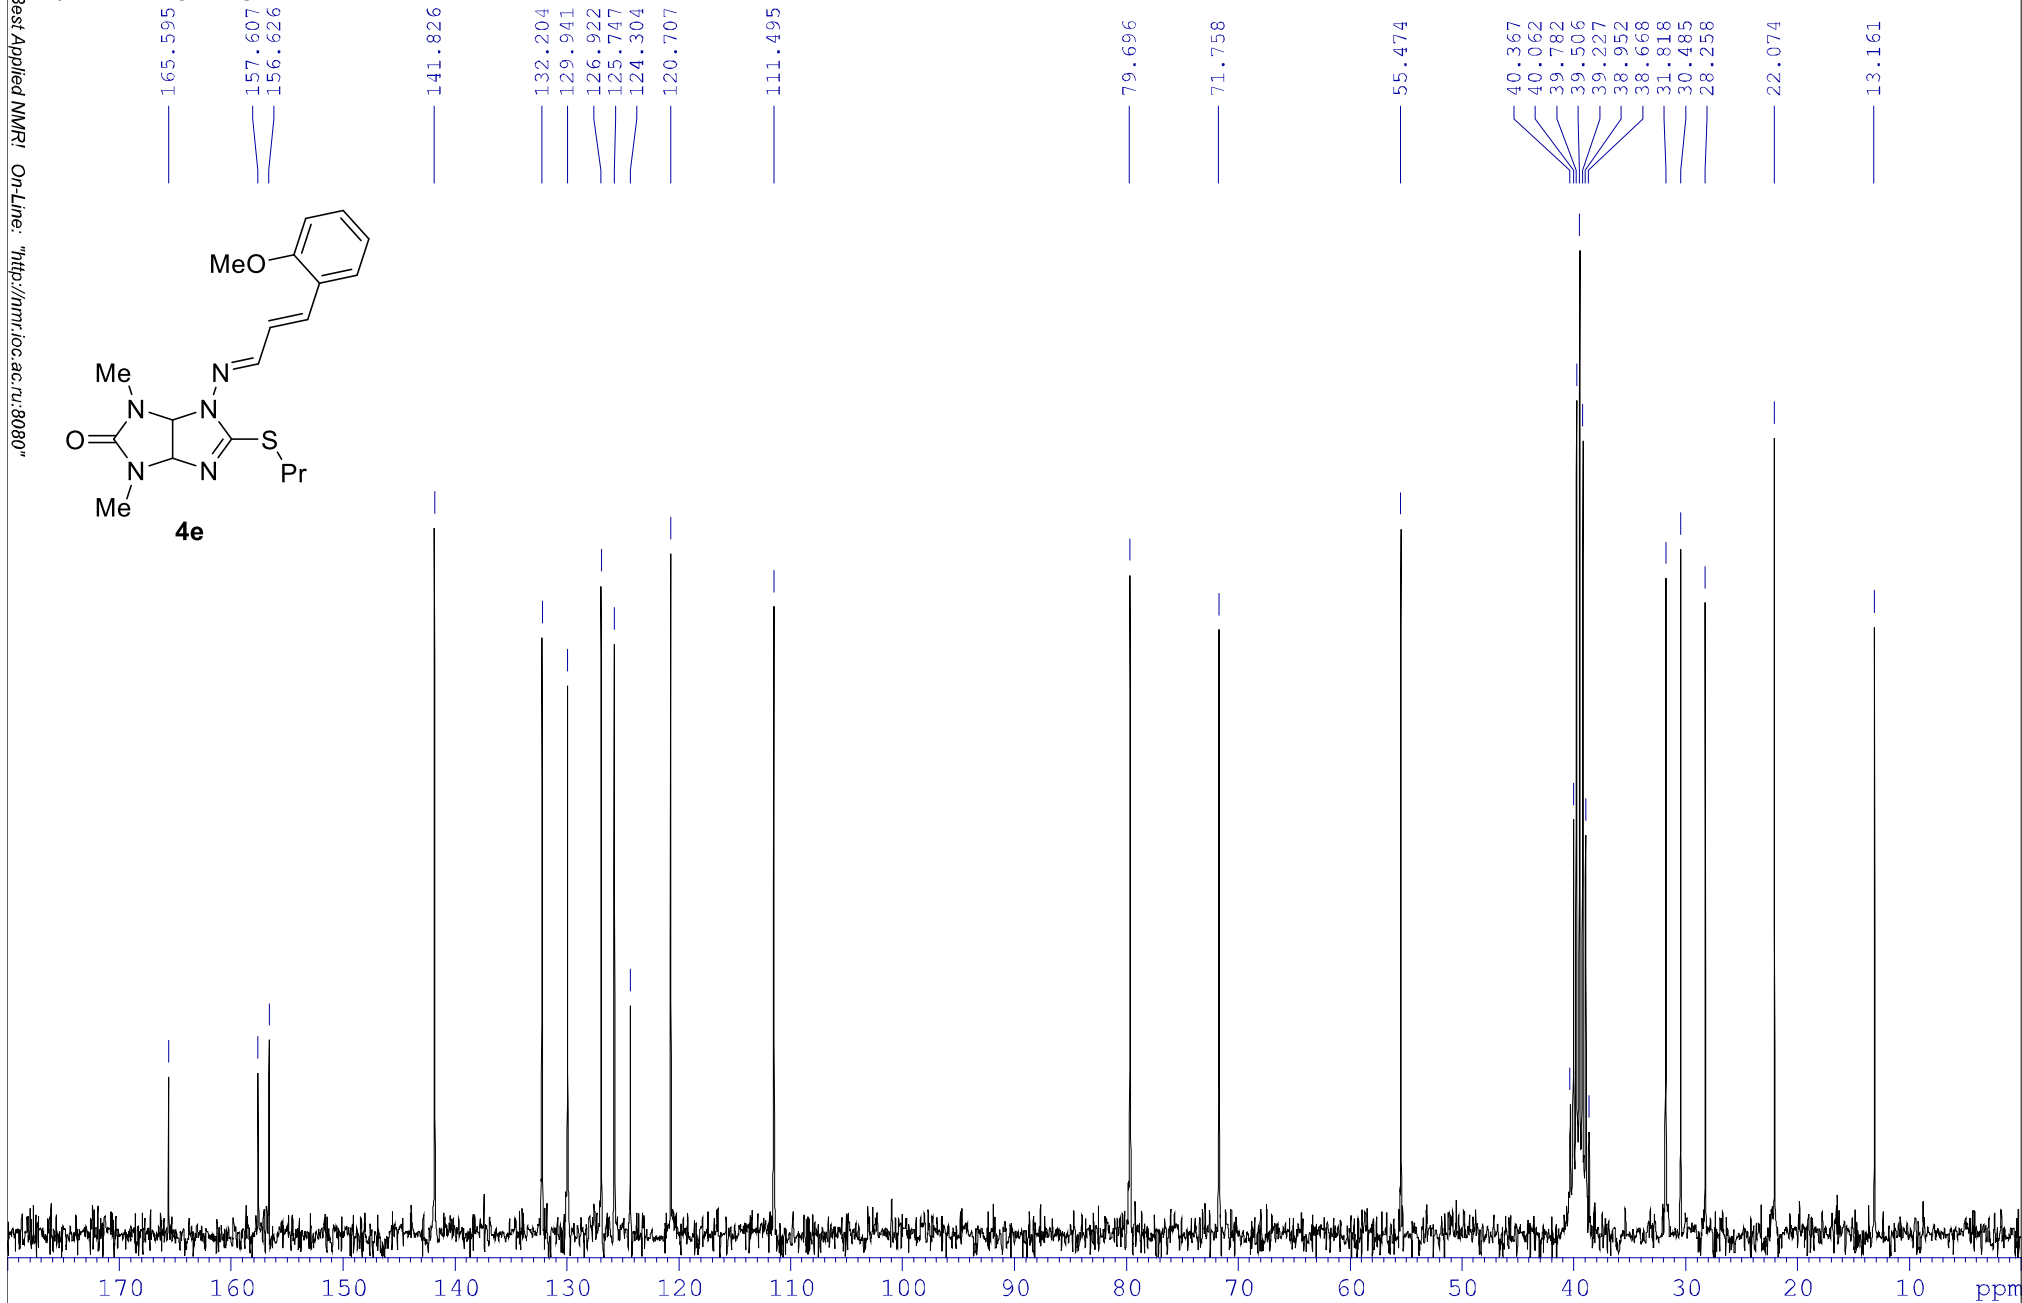

/KANI lav34

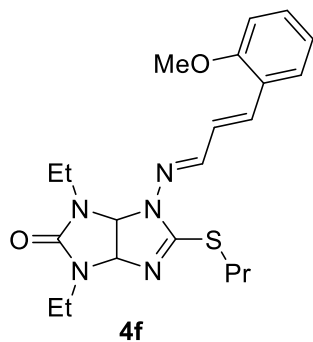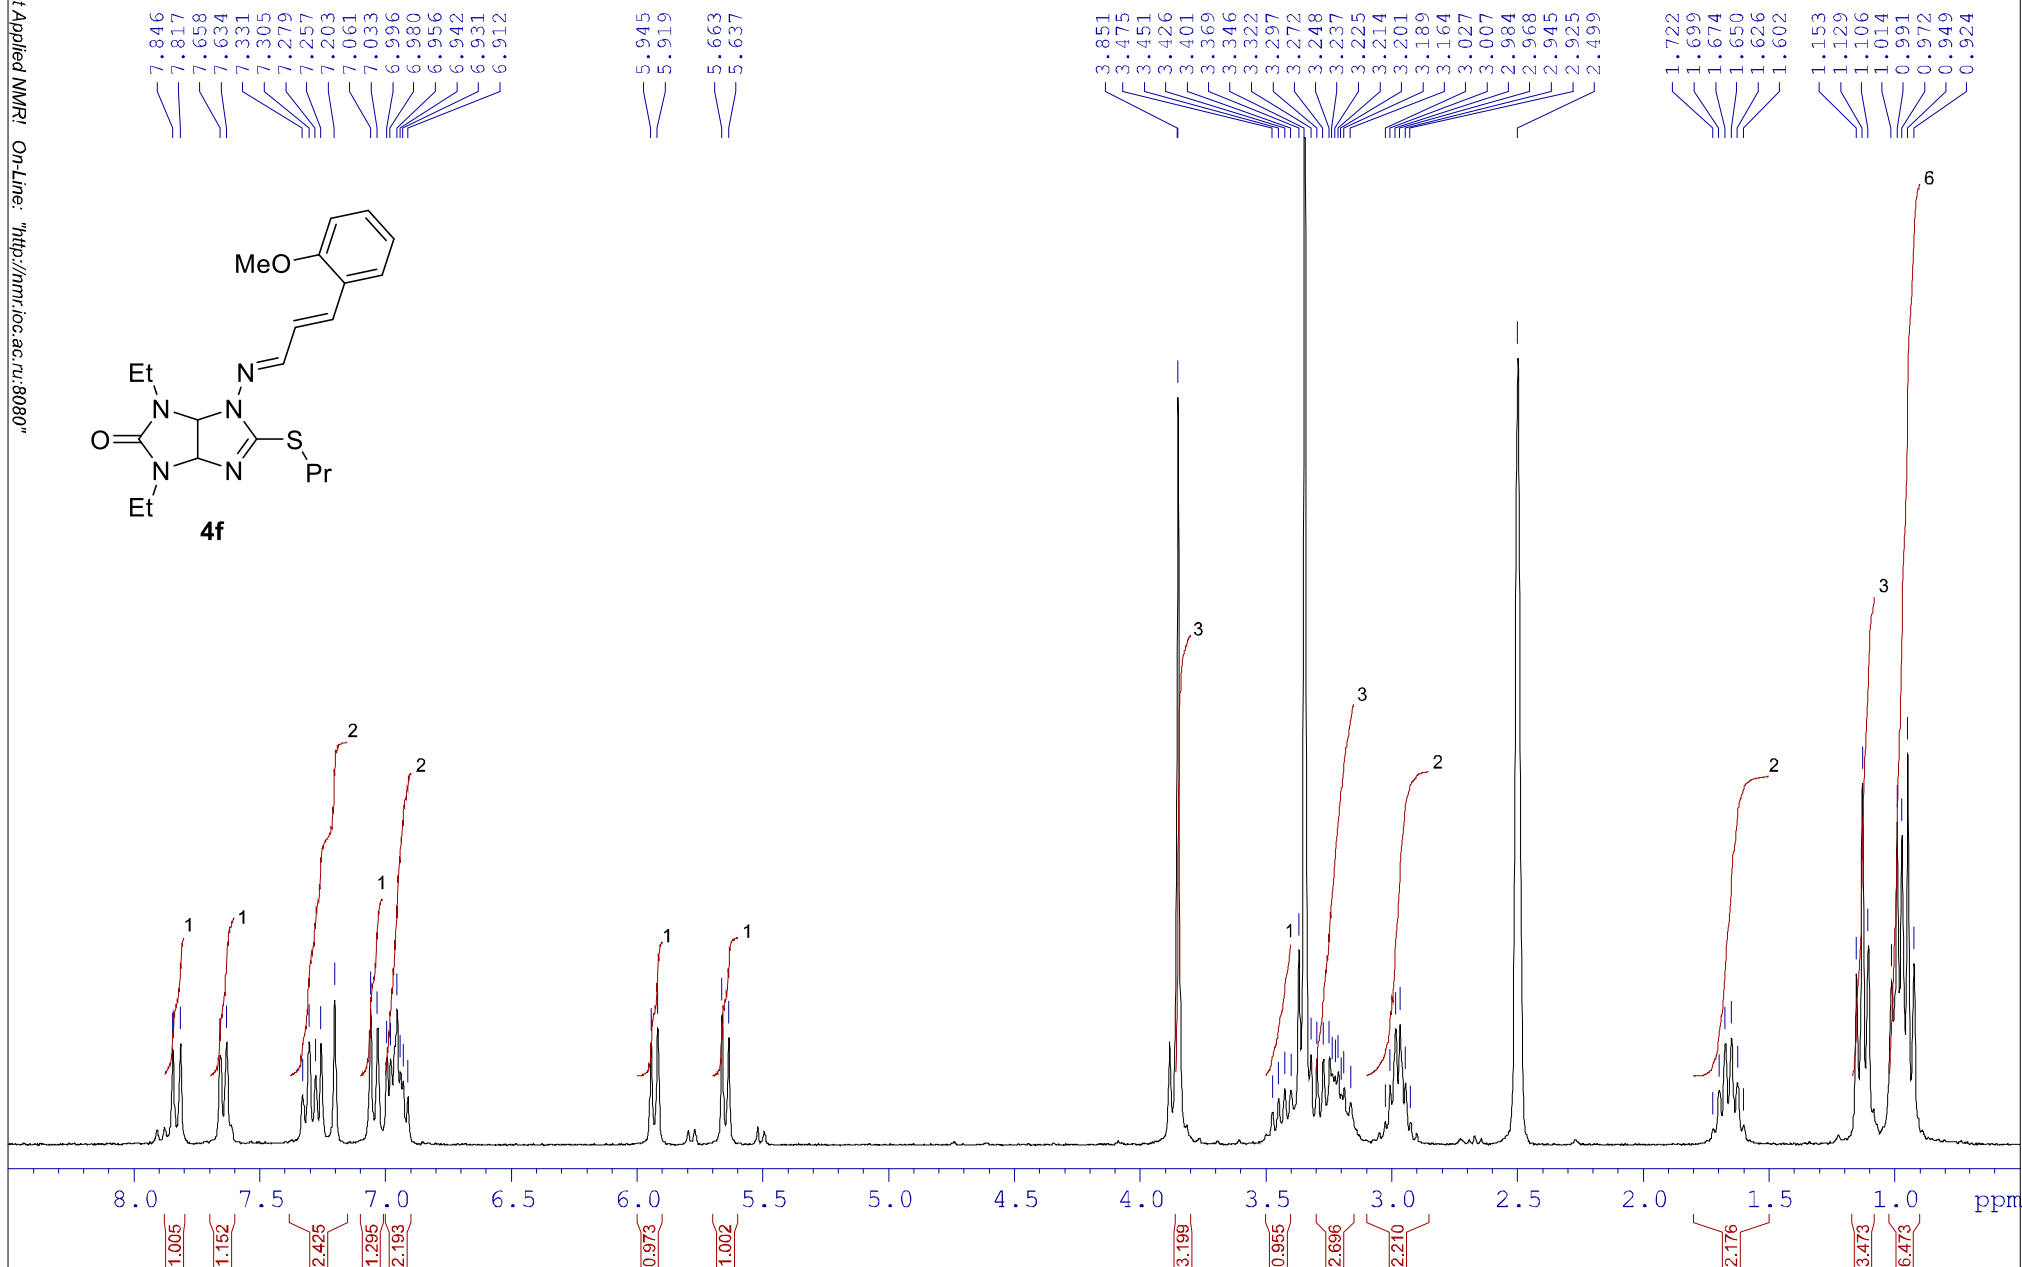

/KANI lav34

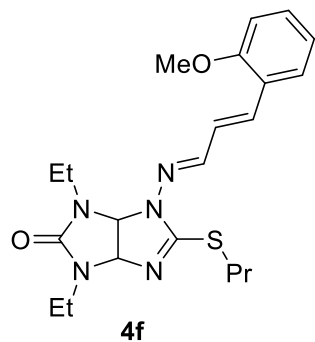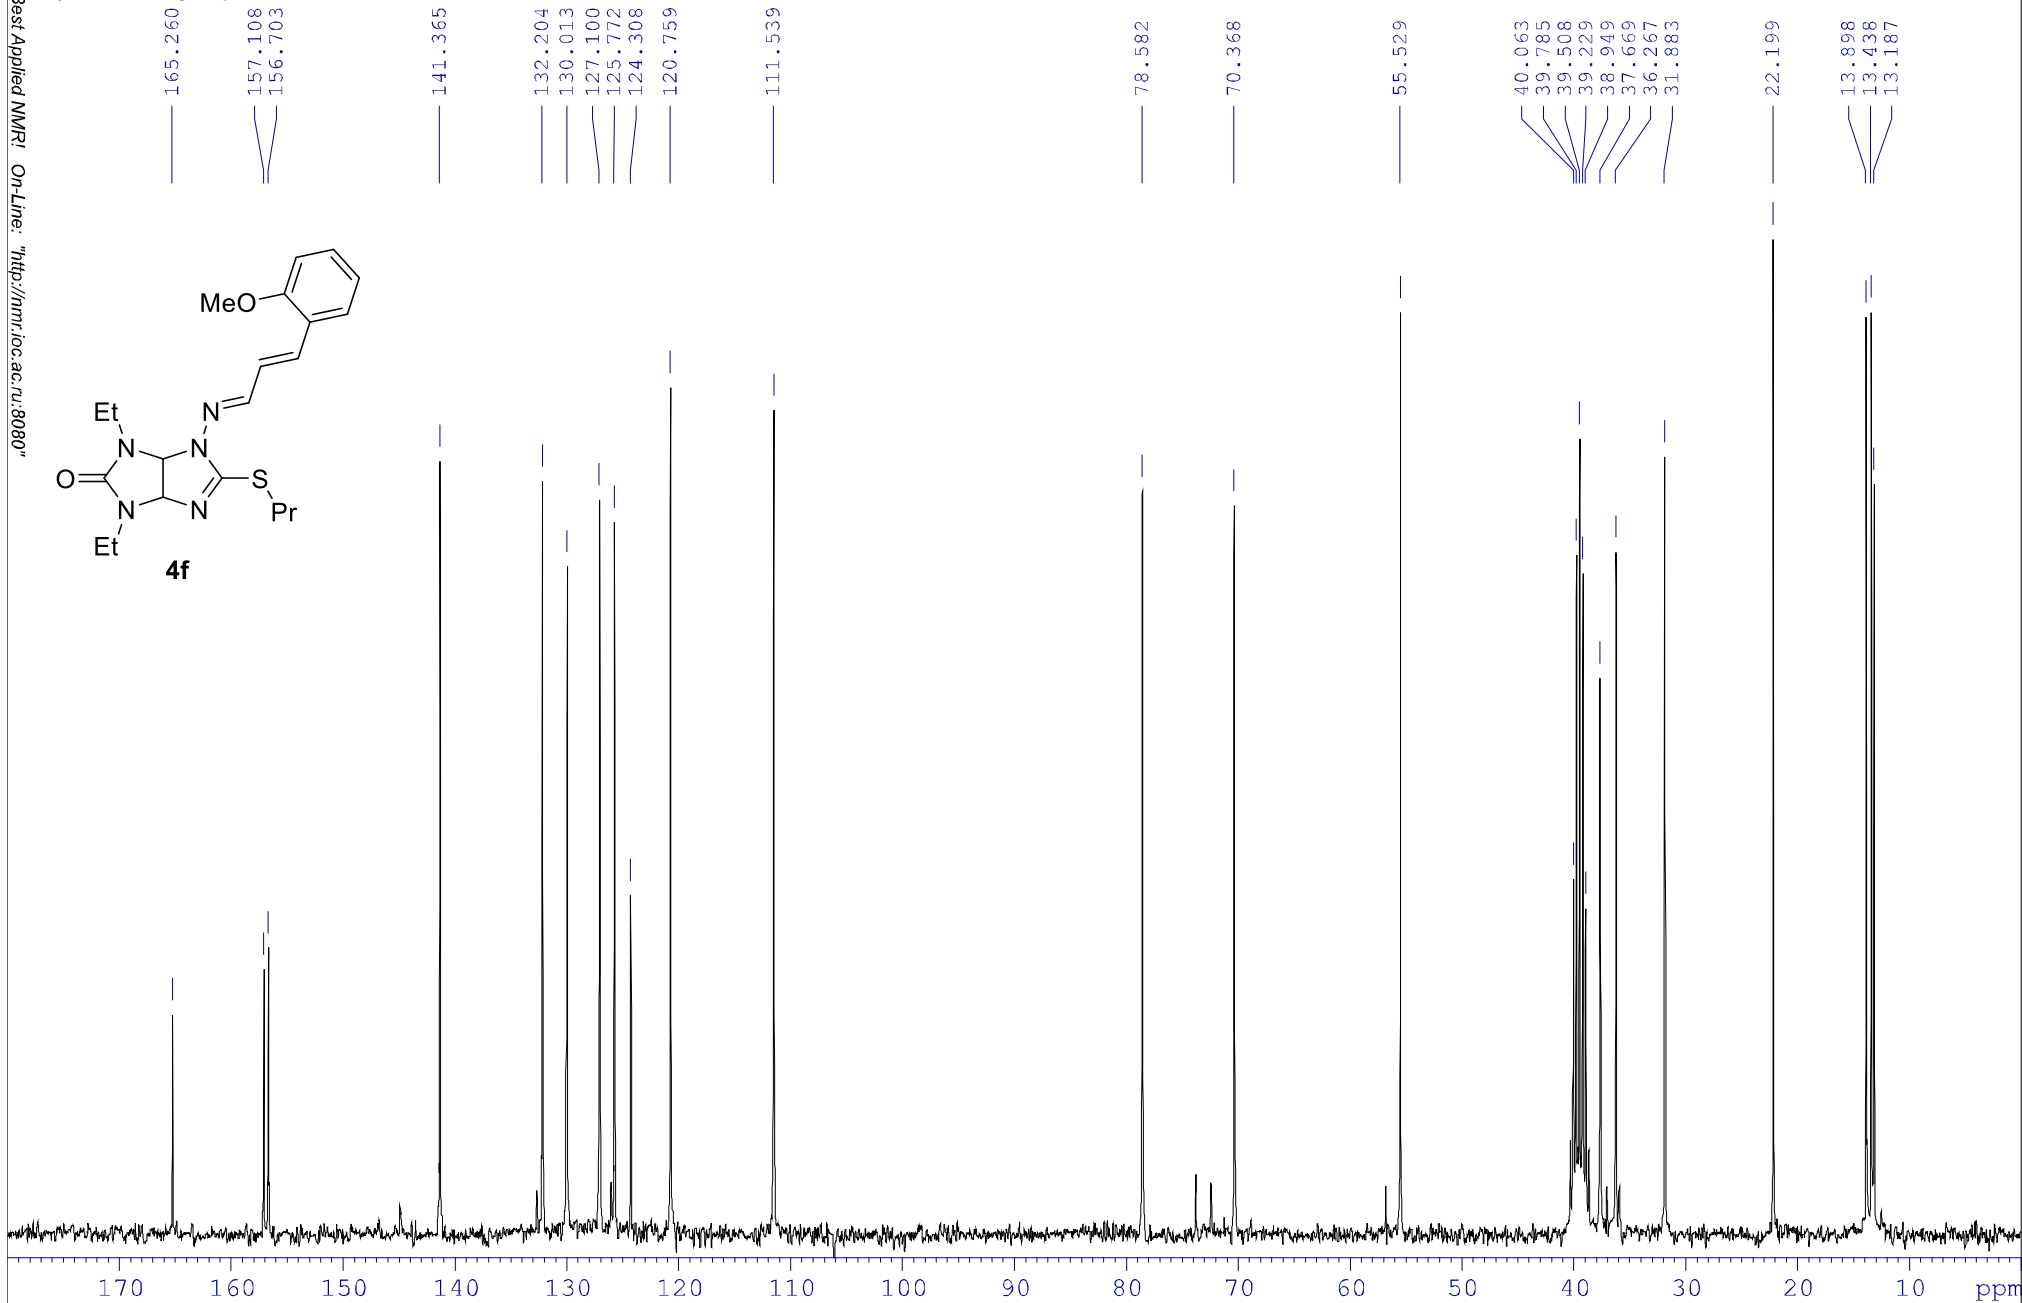

/KANI Lav55.1

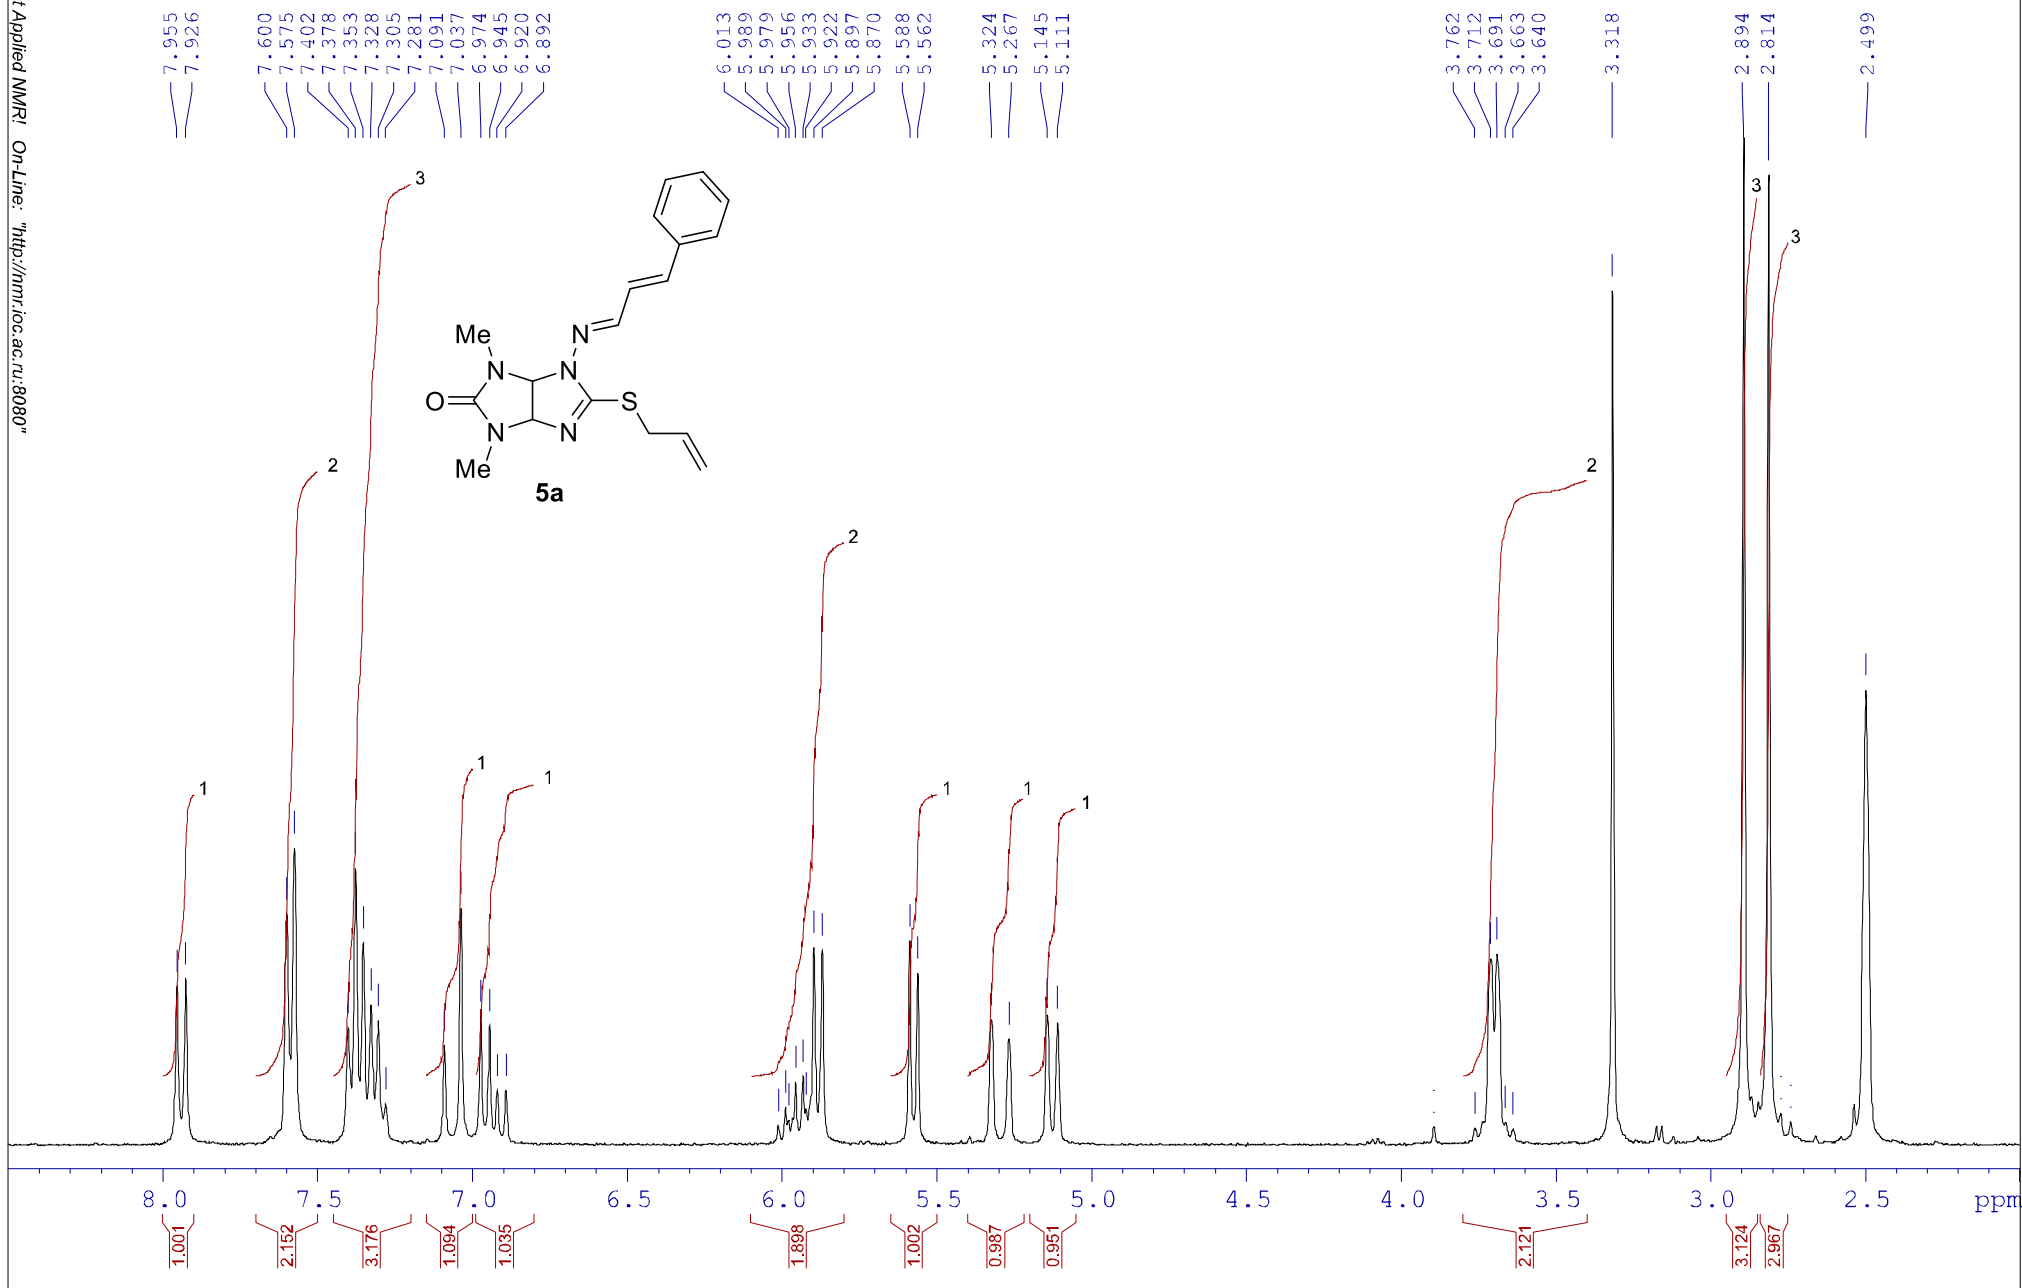

/KANI Lav55.1

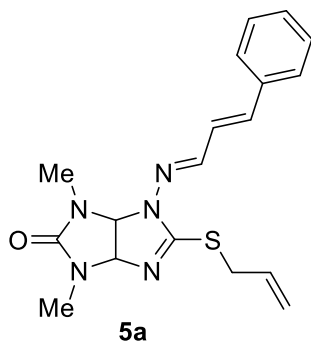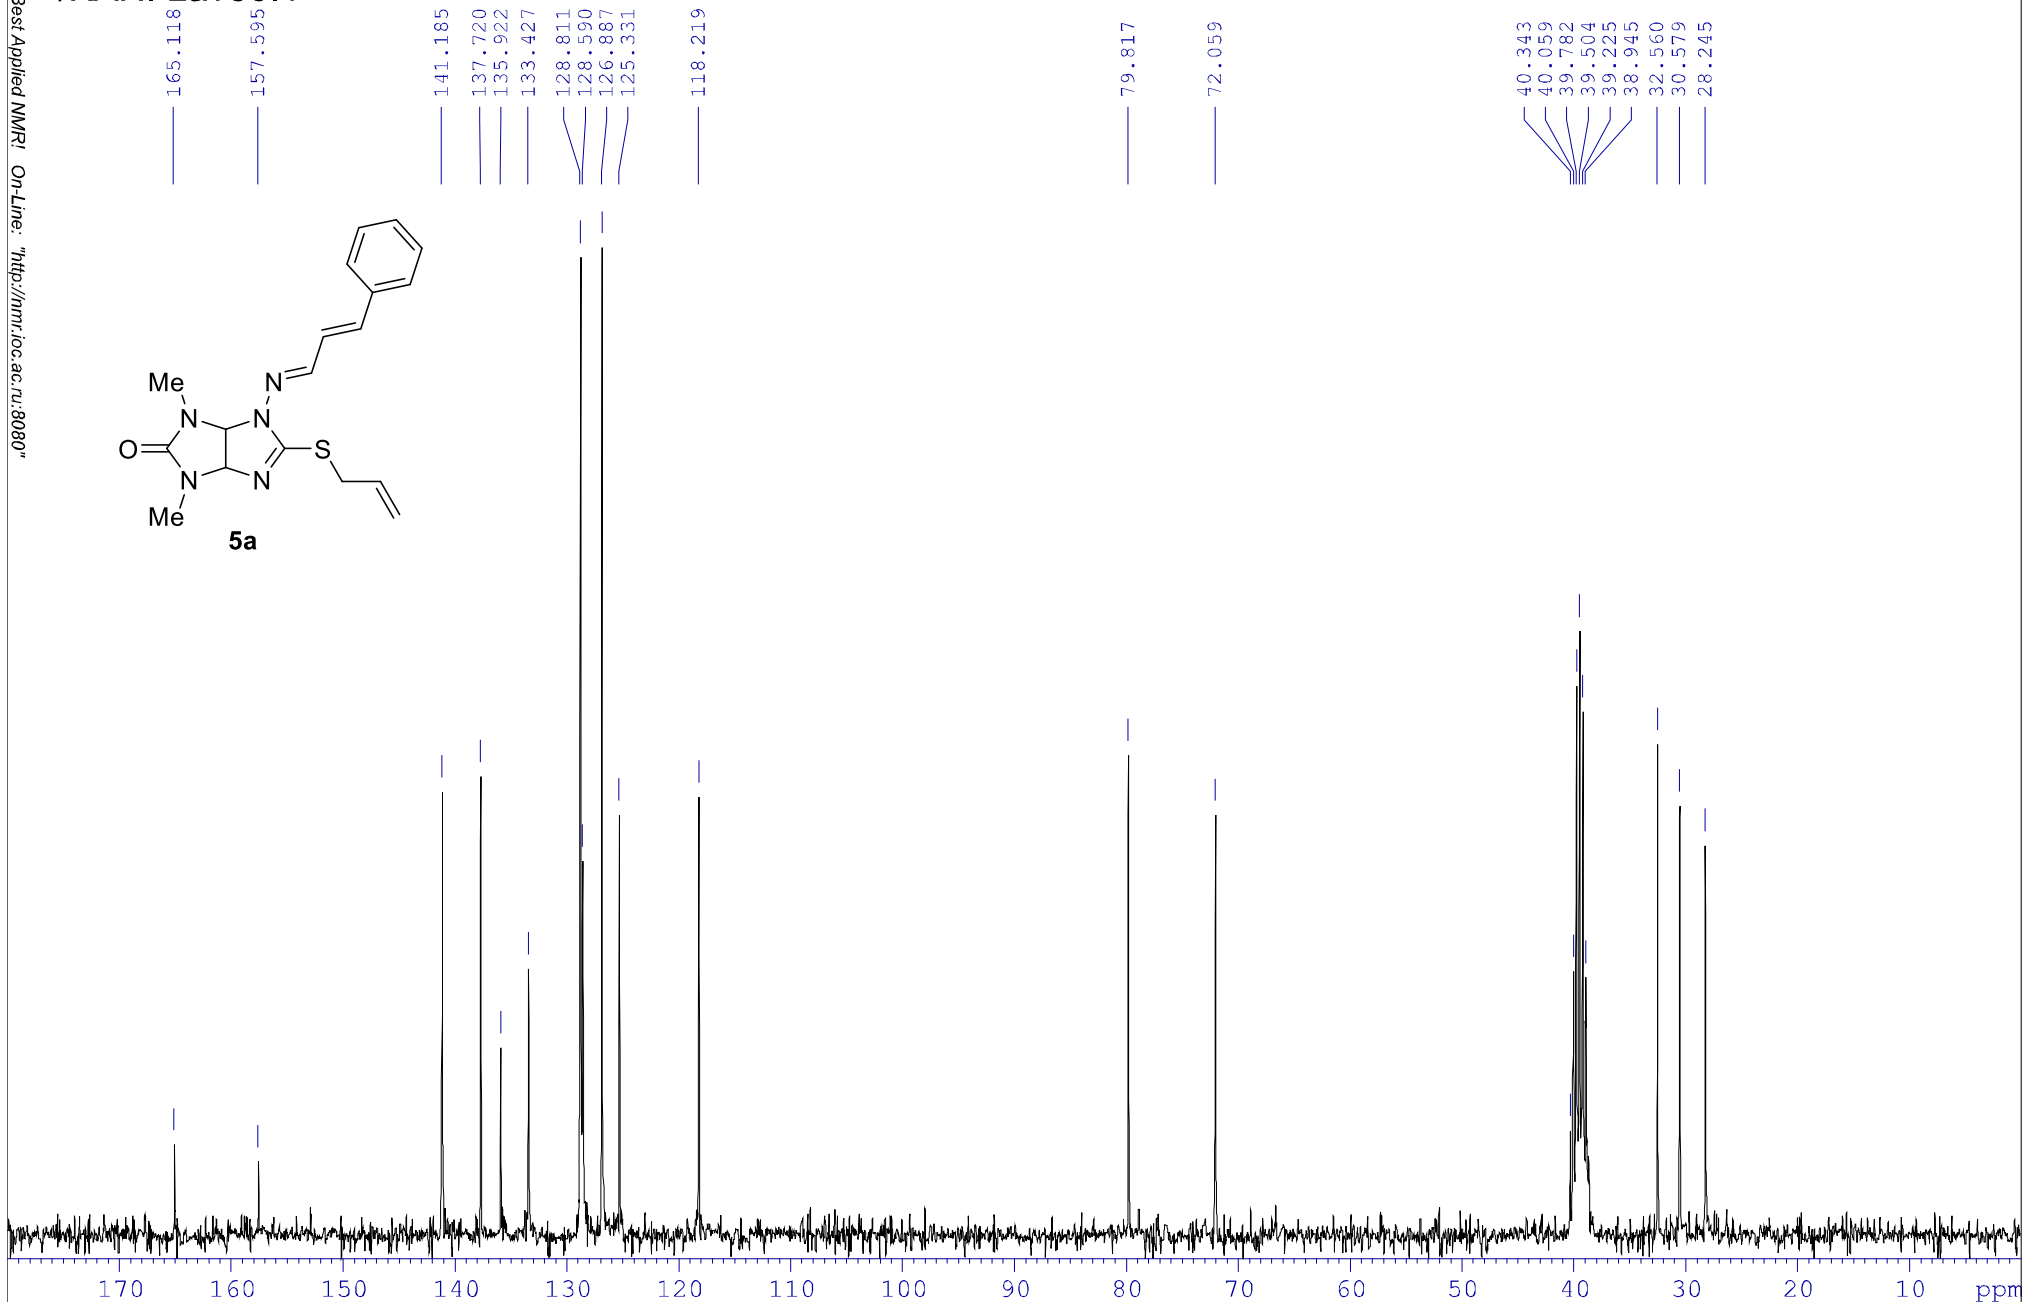

/KANI Lav40.kr1

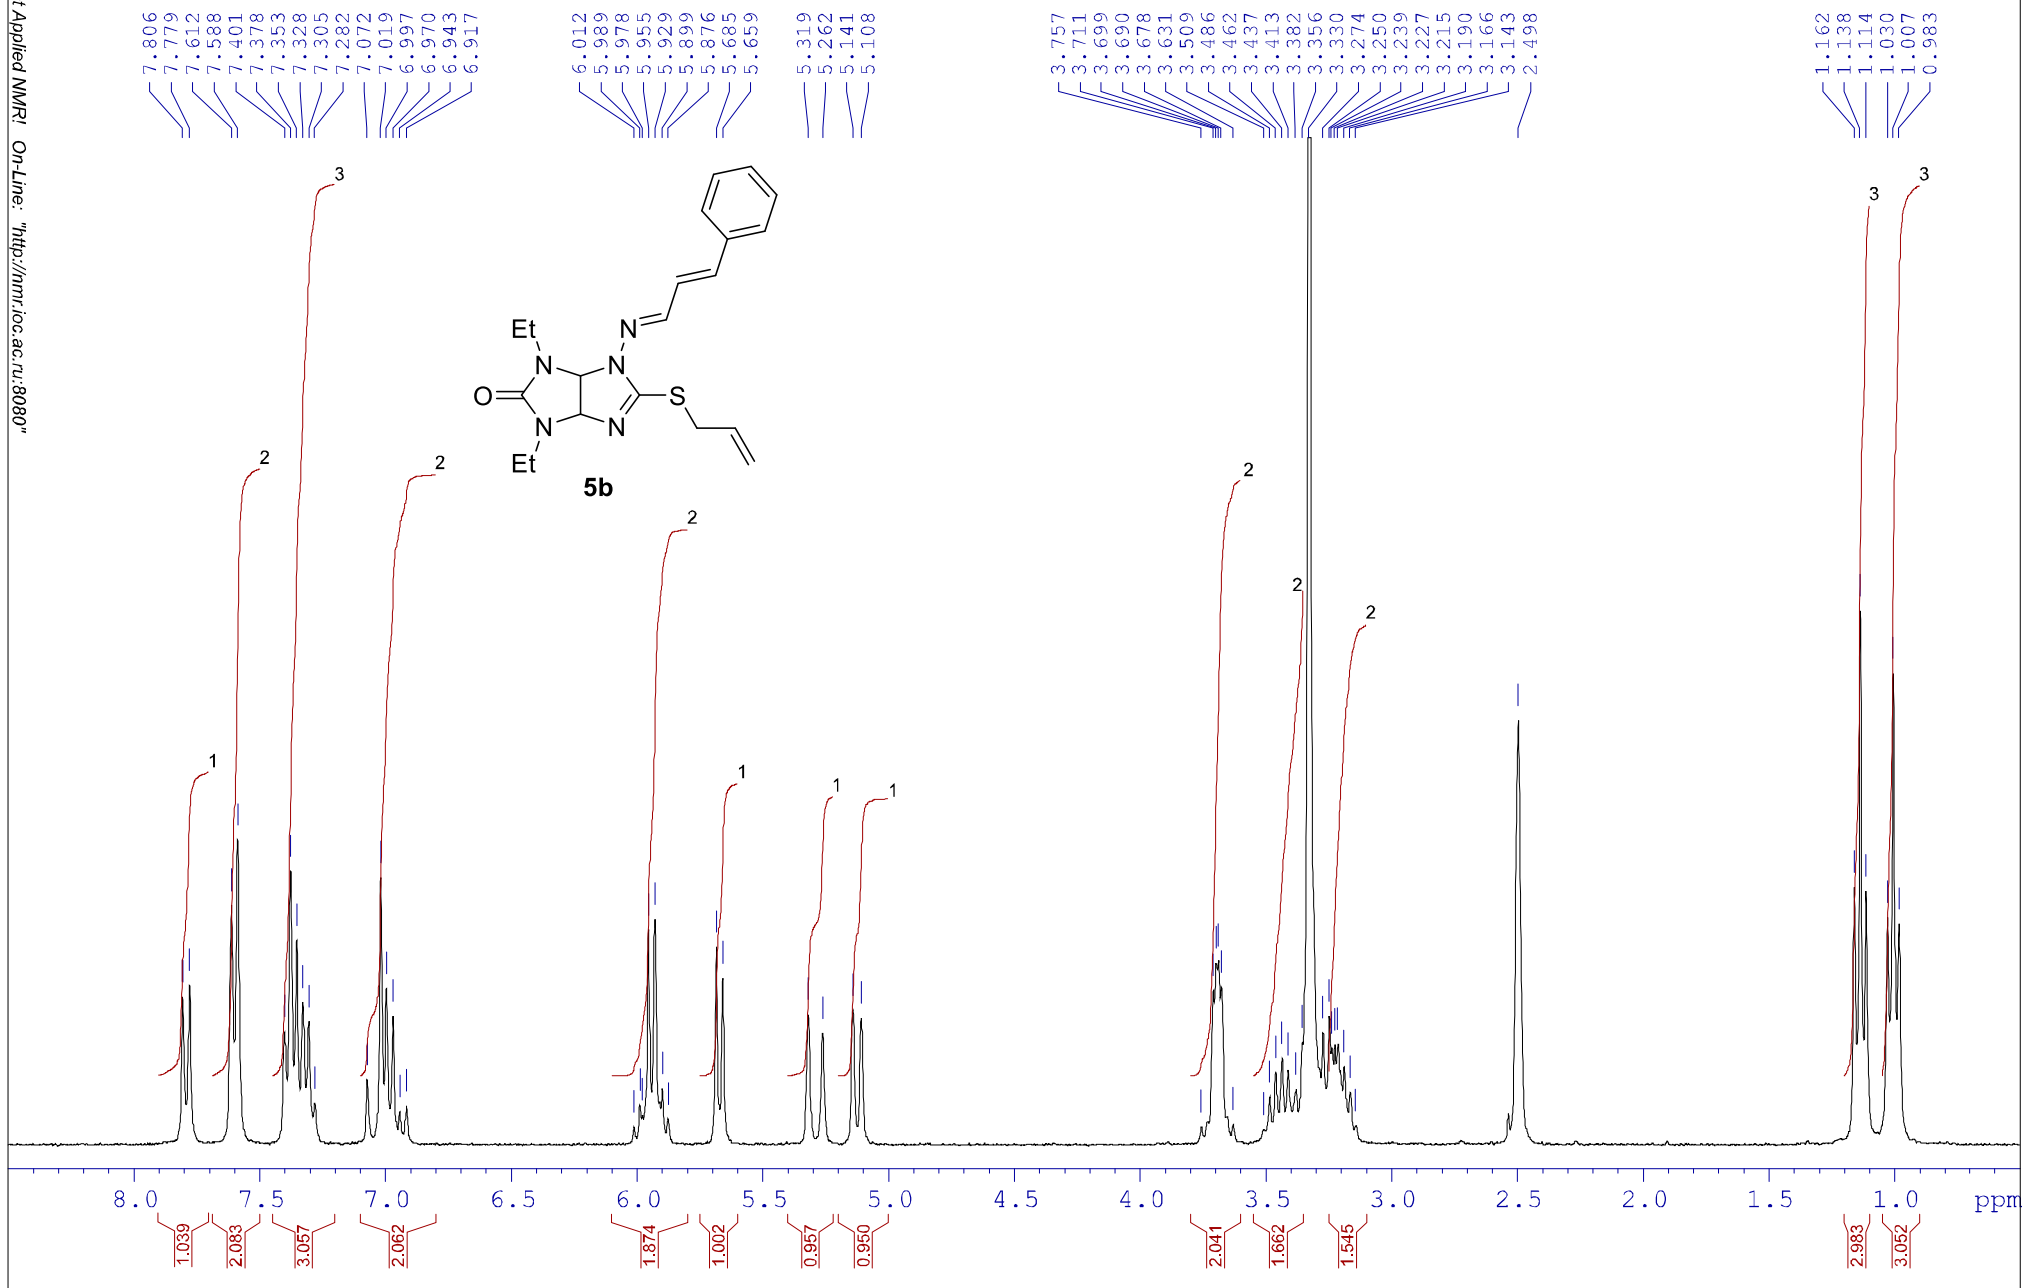



/KANI Lav40.kr1

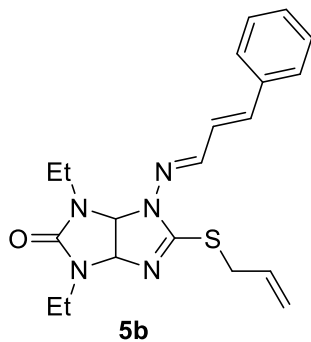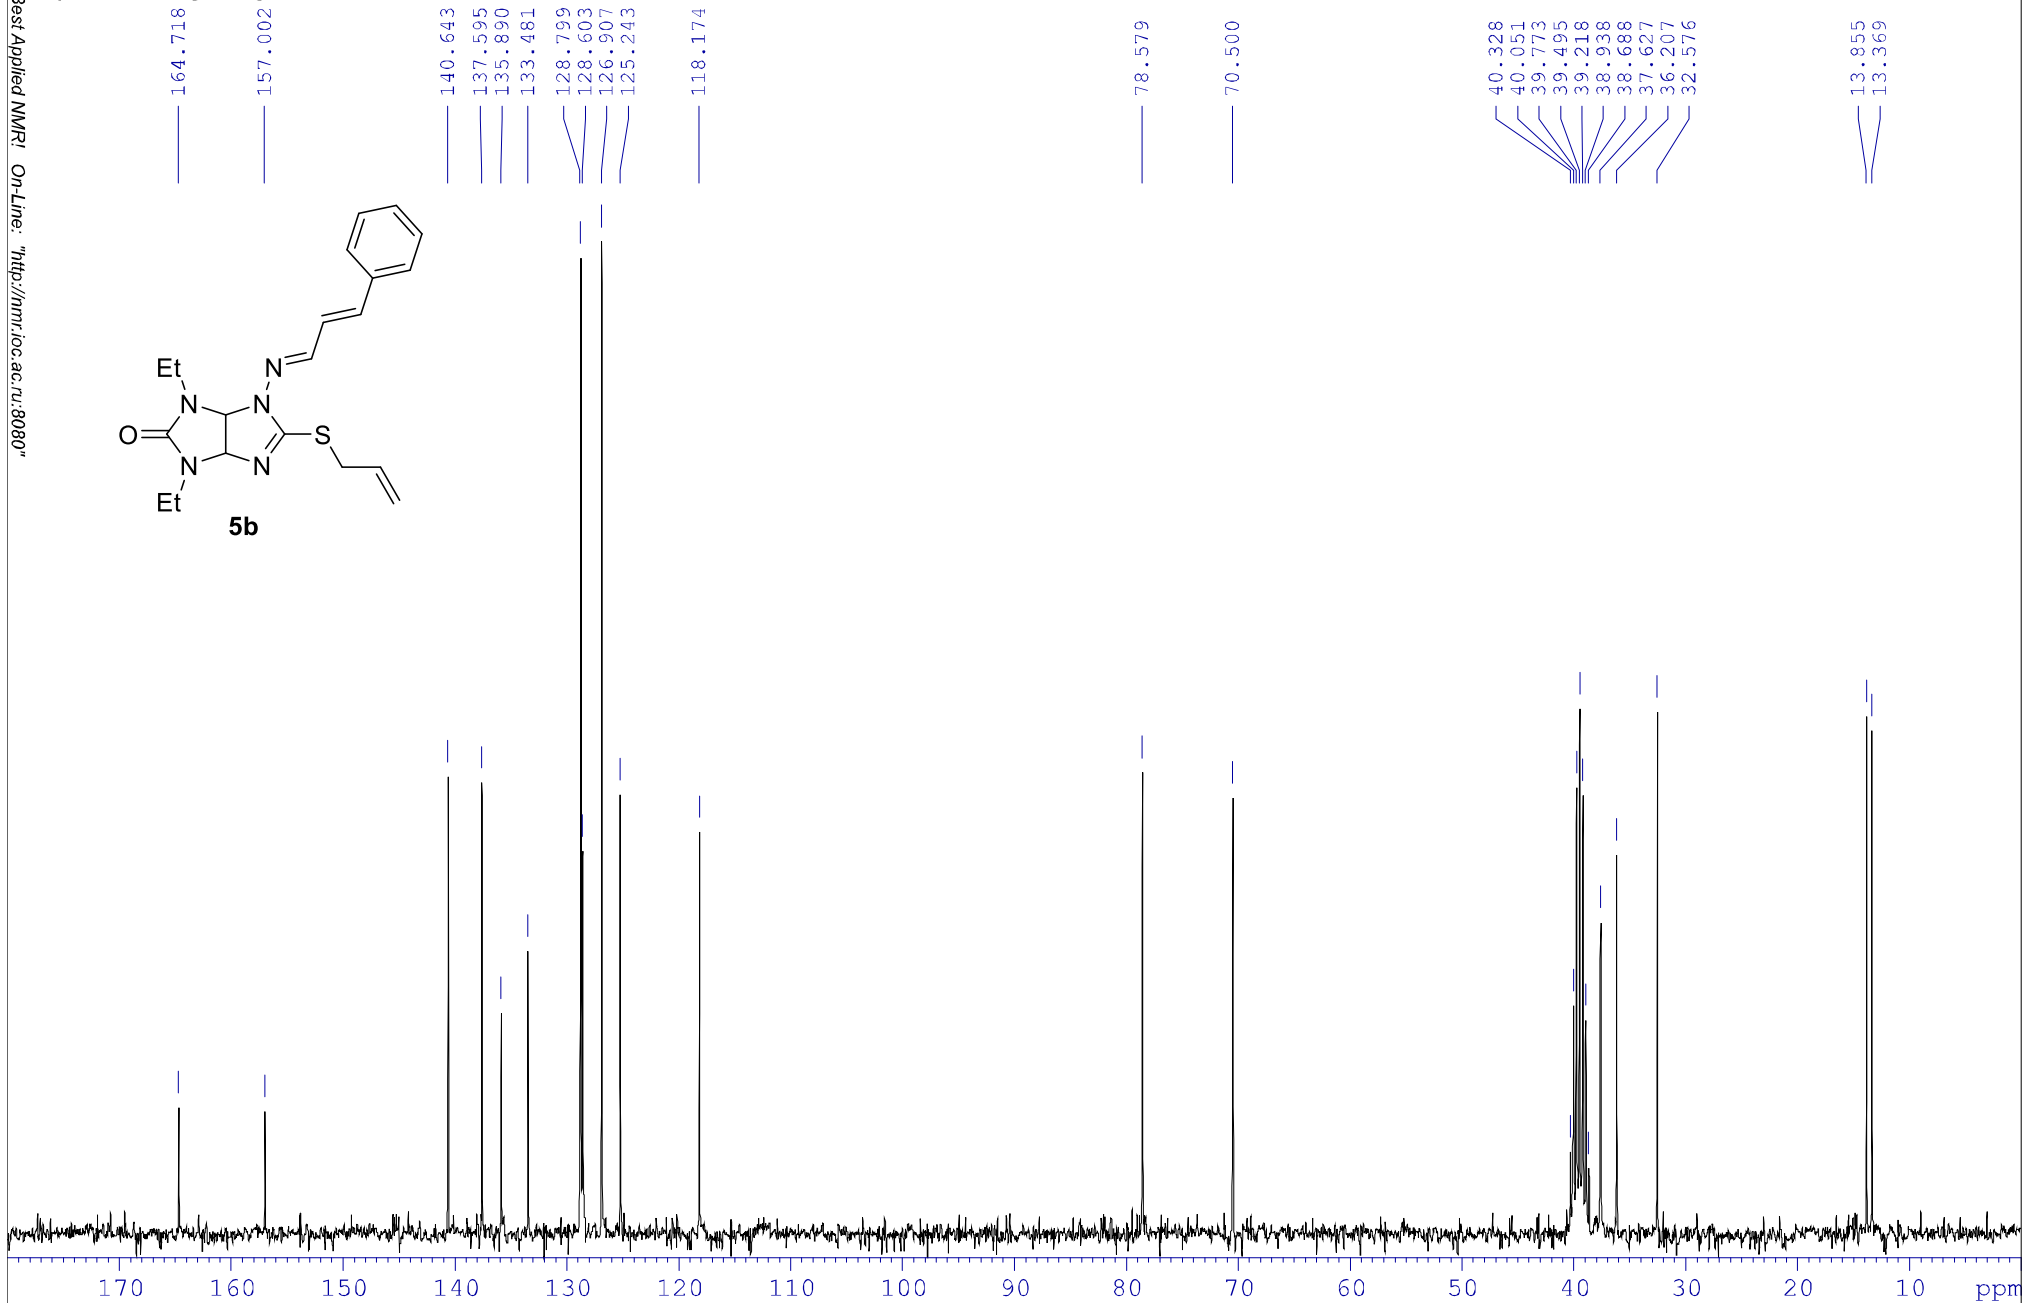

/KANI Lav39.1

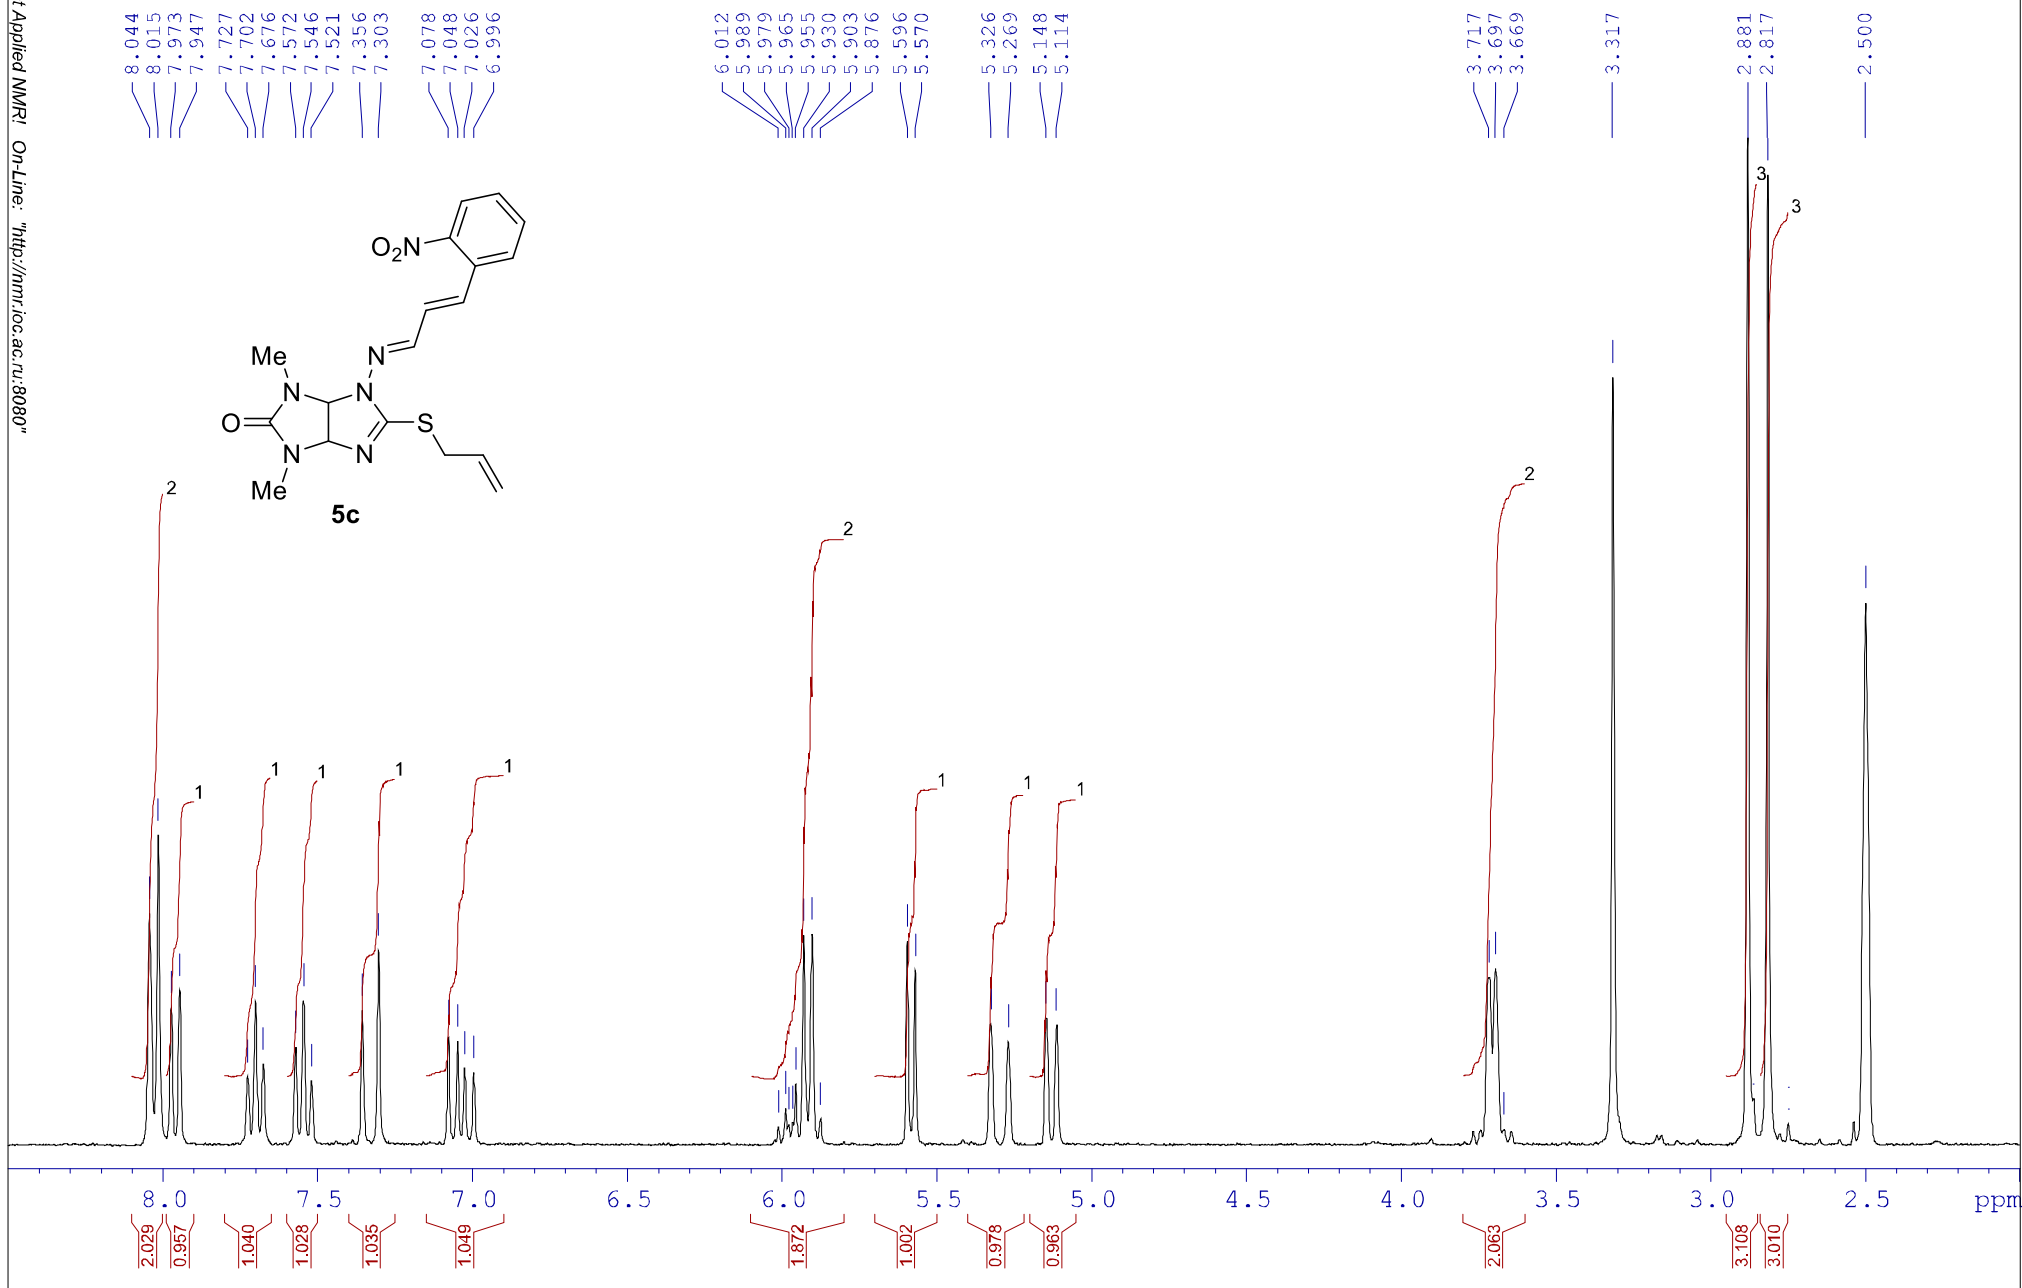

/KANI Lav39.1

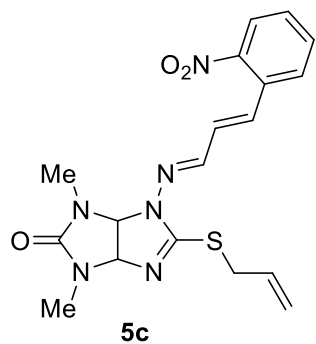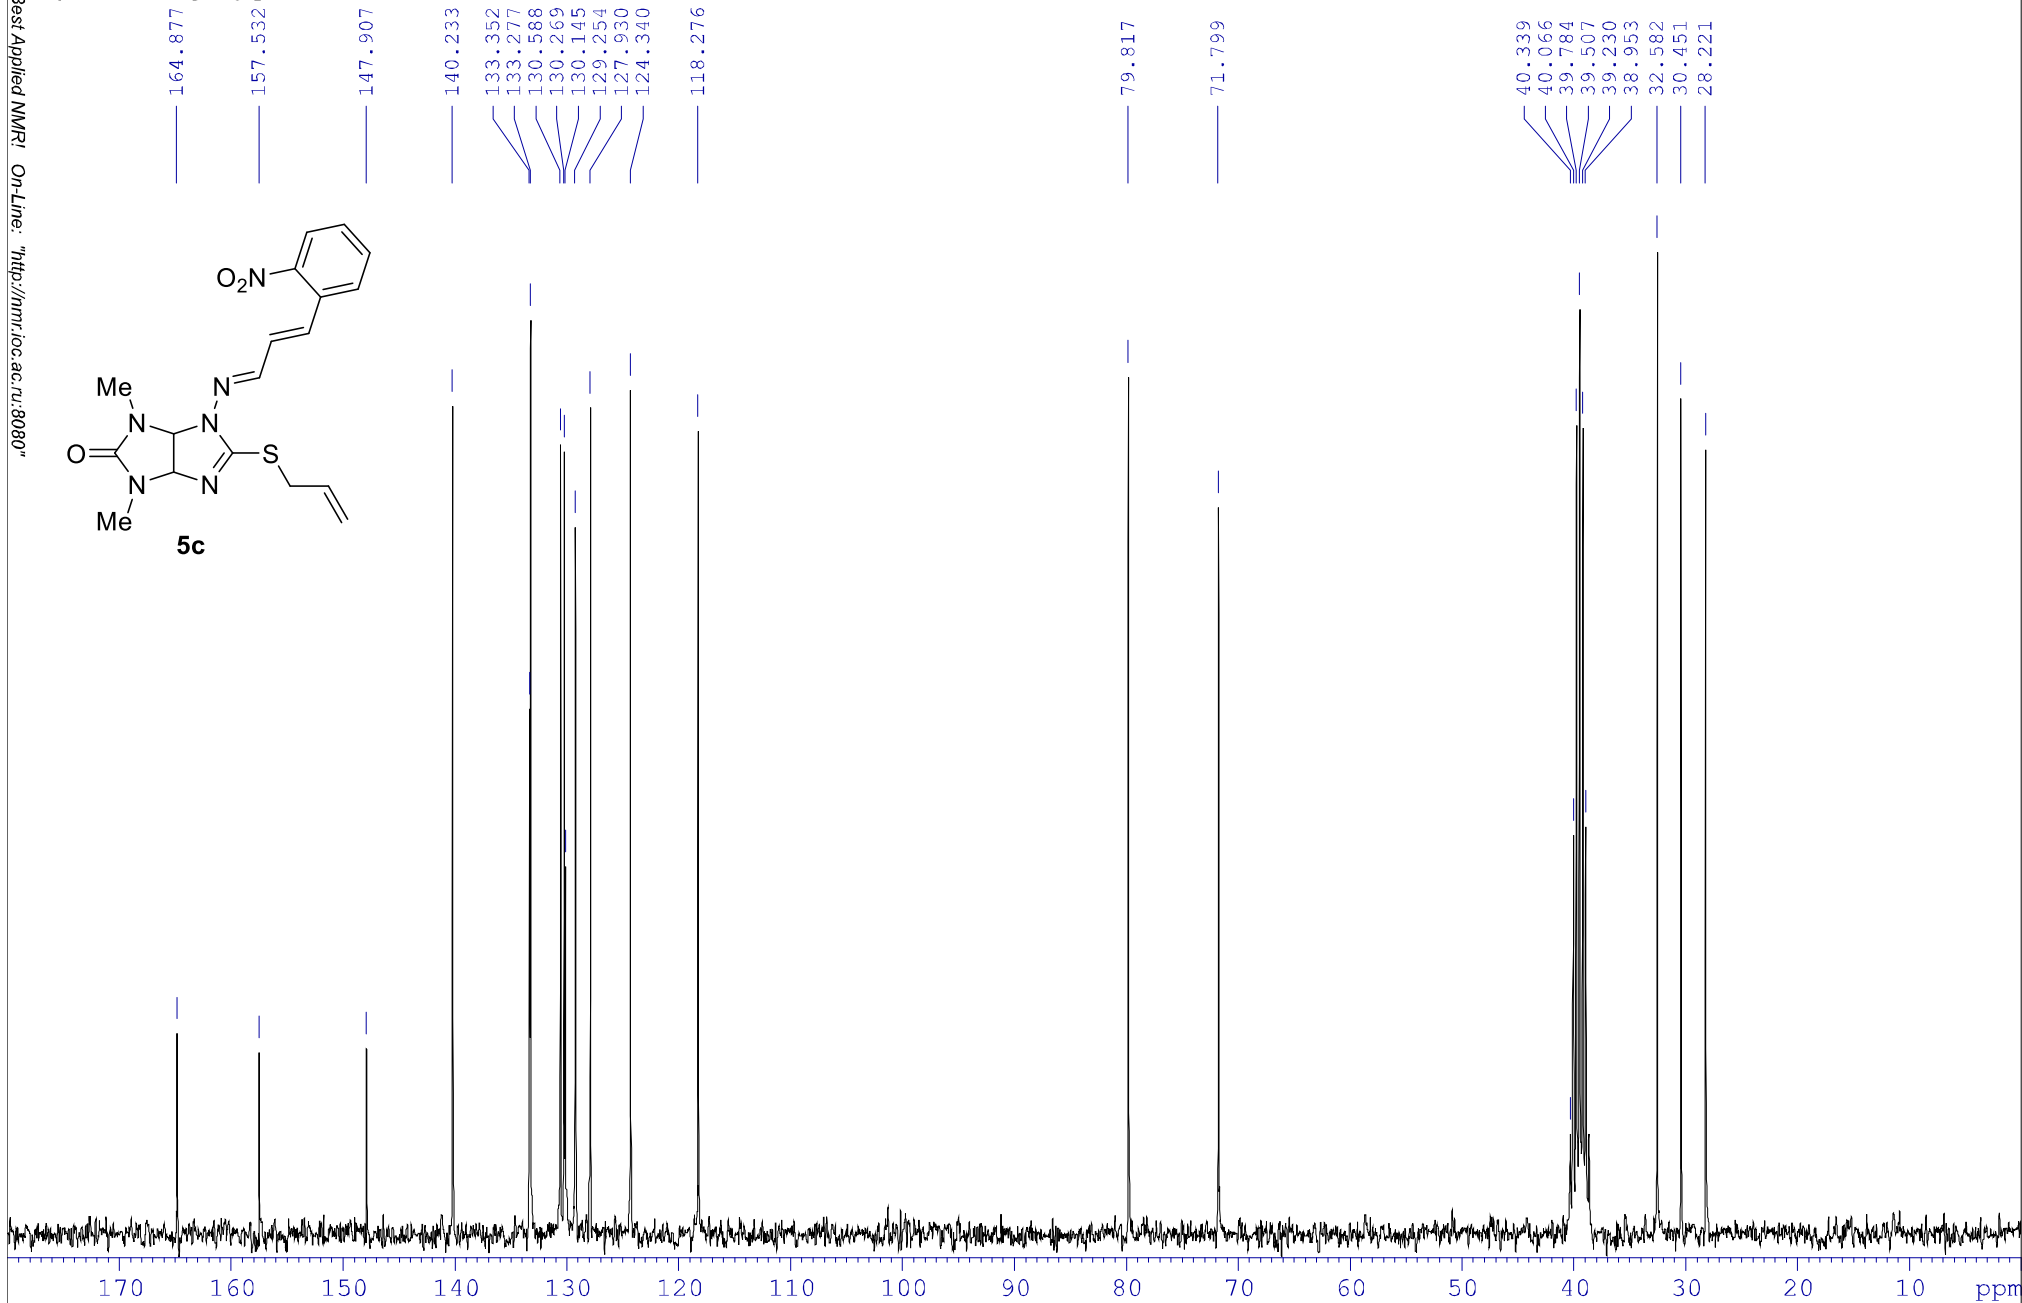

/KANI lav38.1

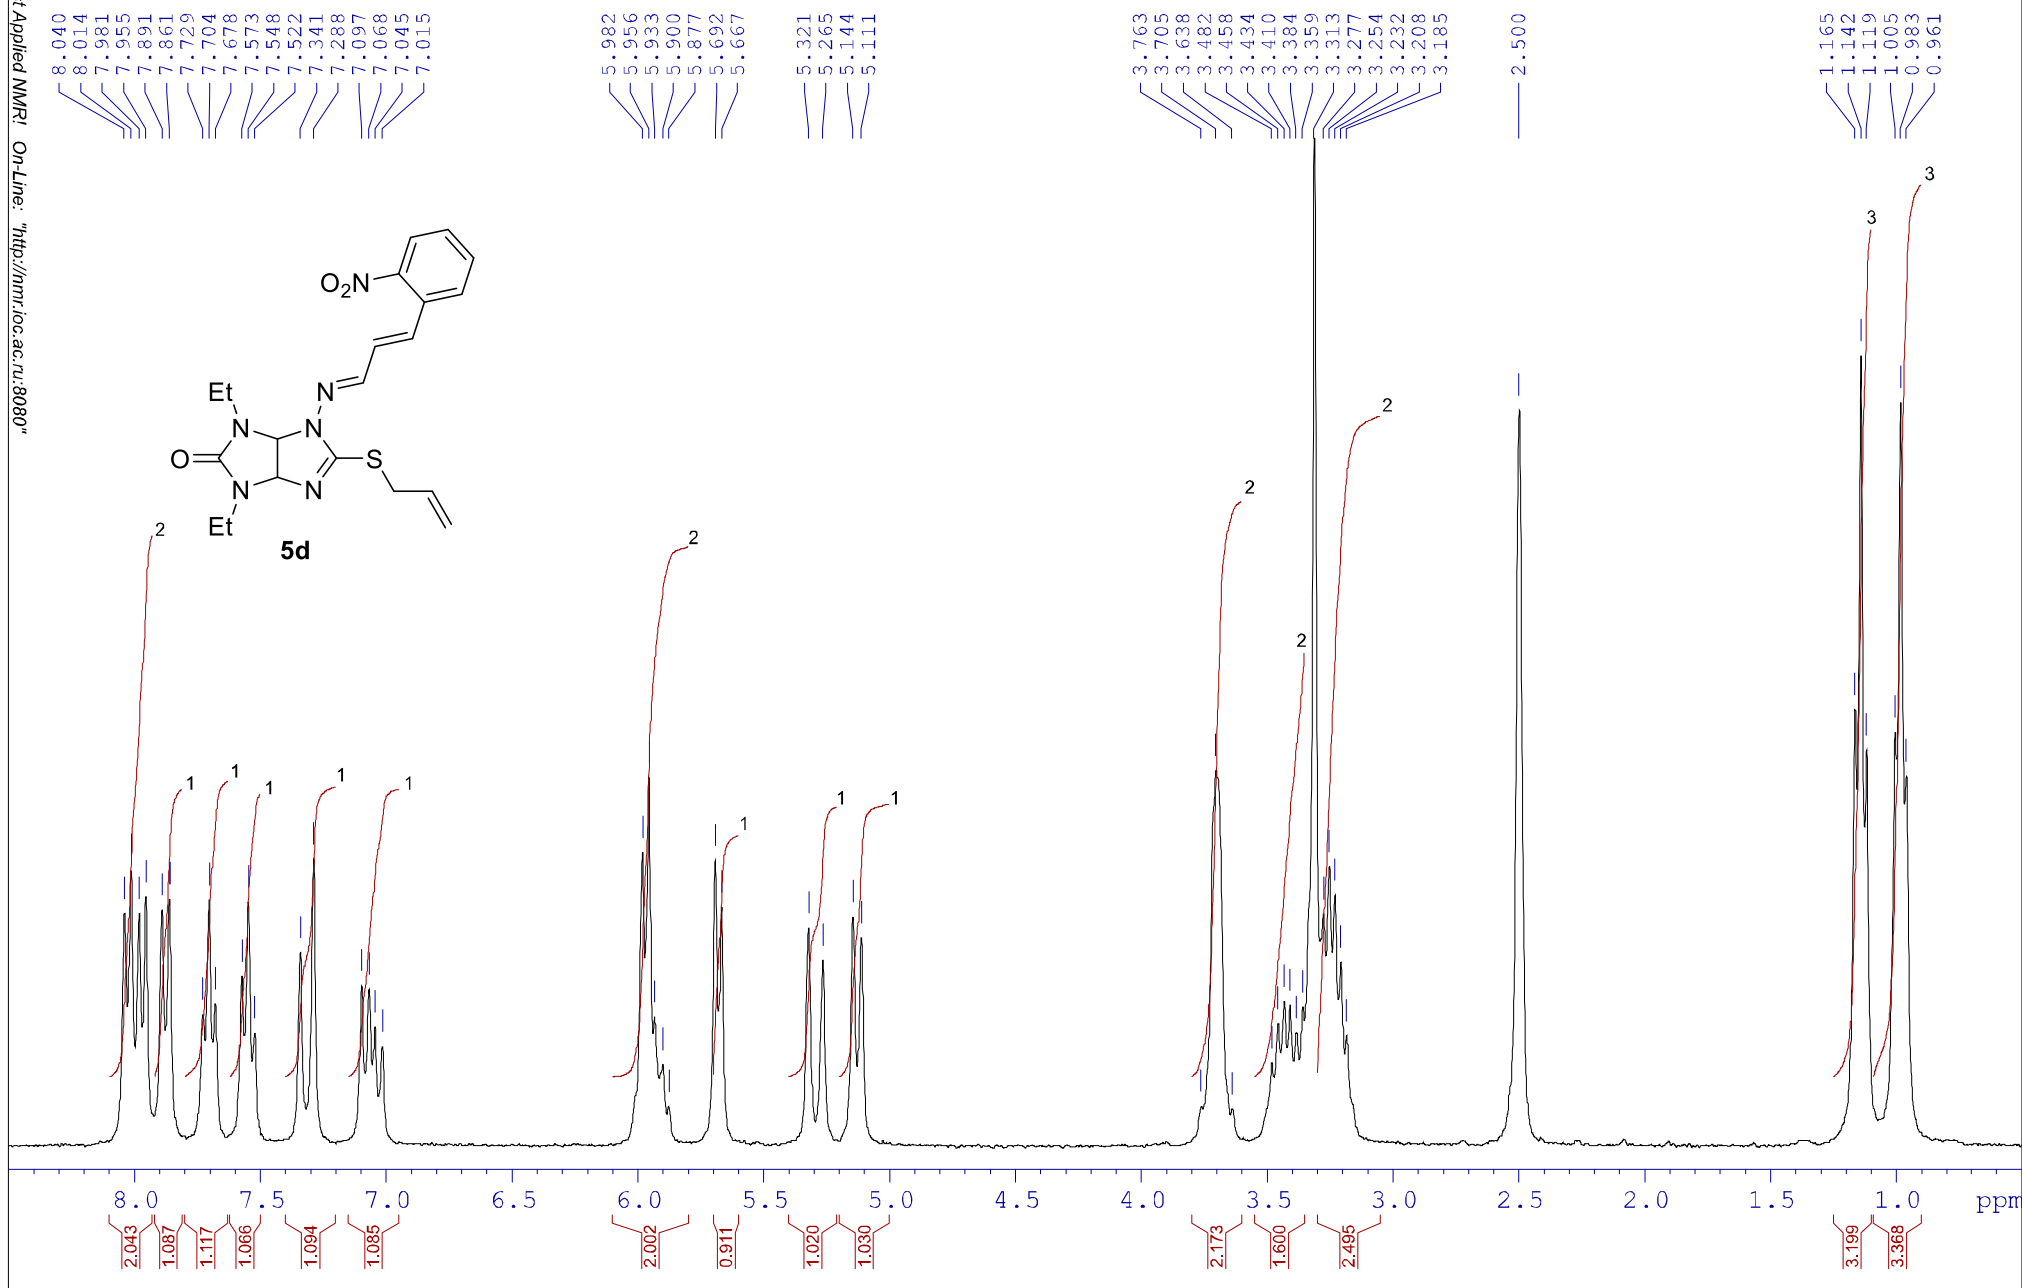

/KANI lav38.1

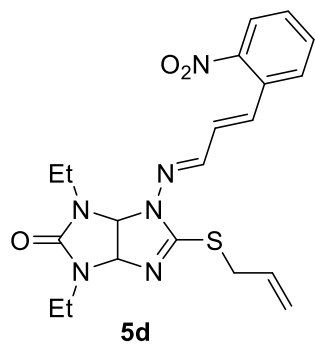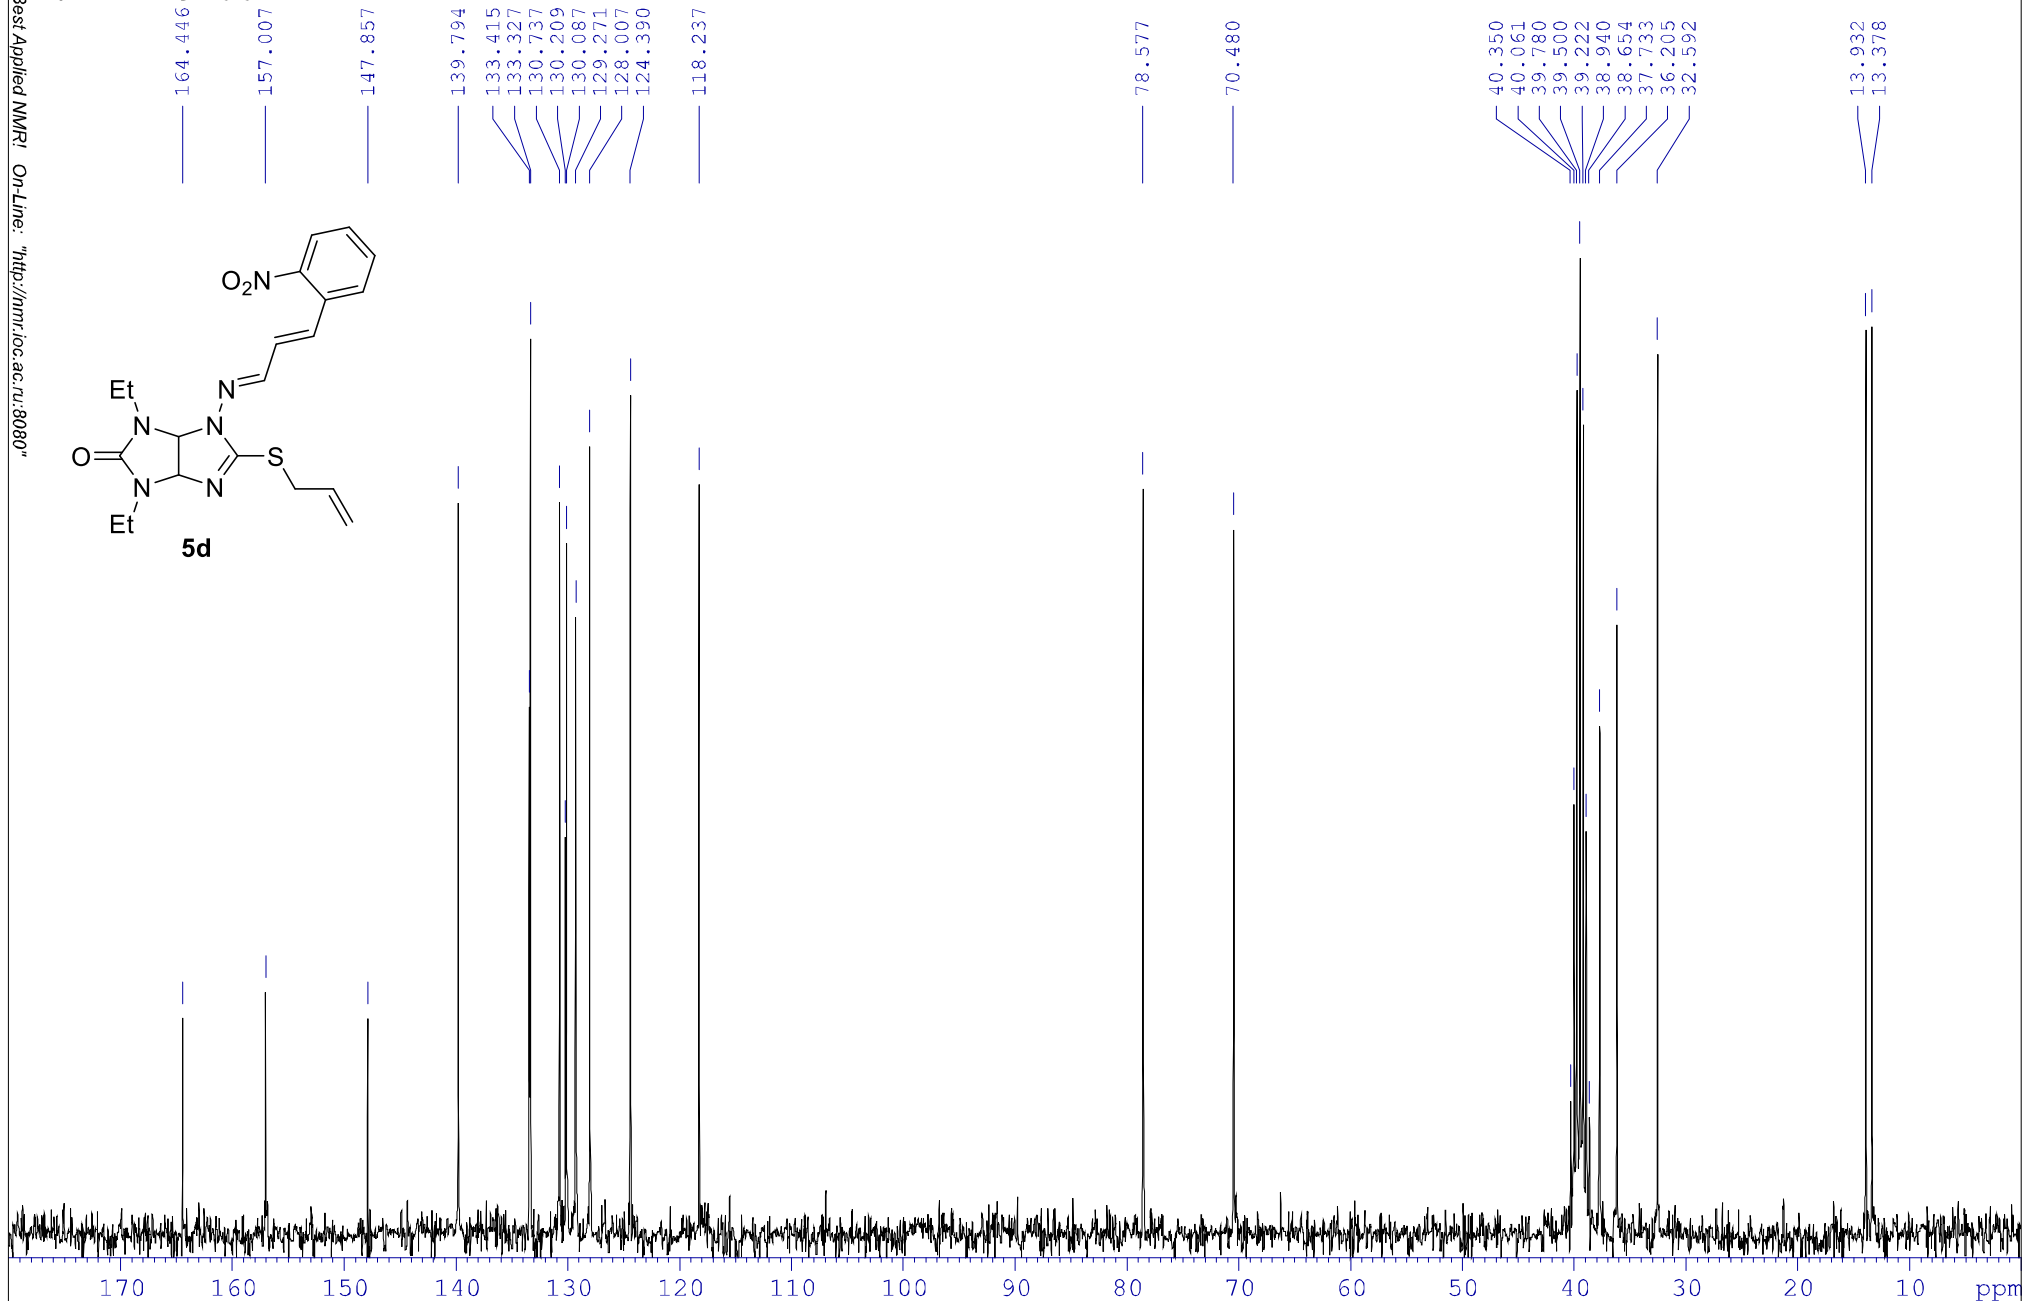

/KANI lav50.1

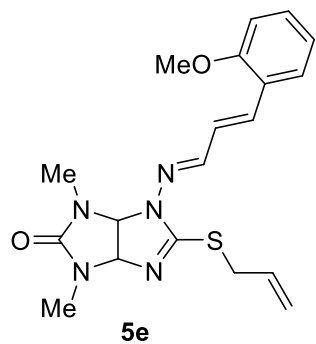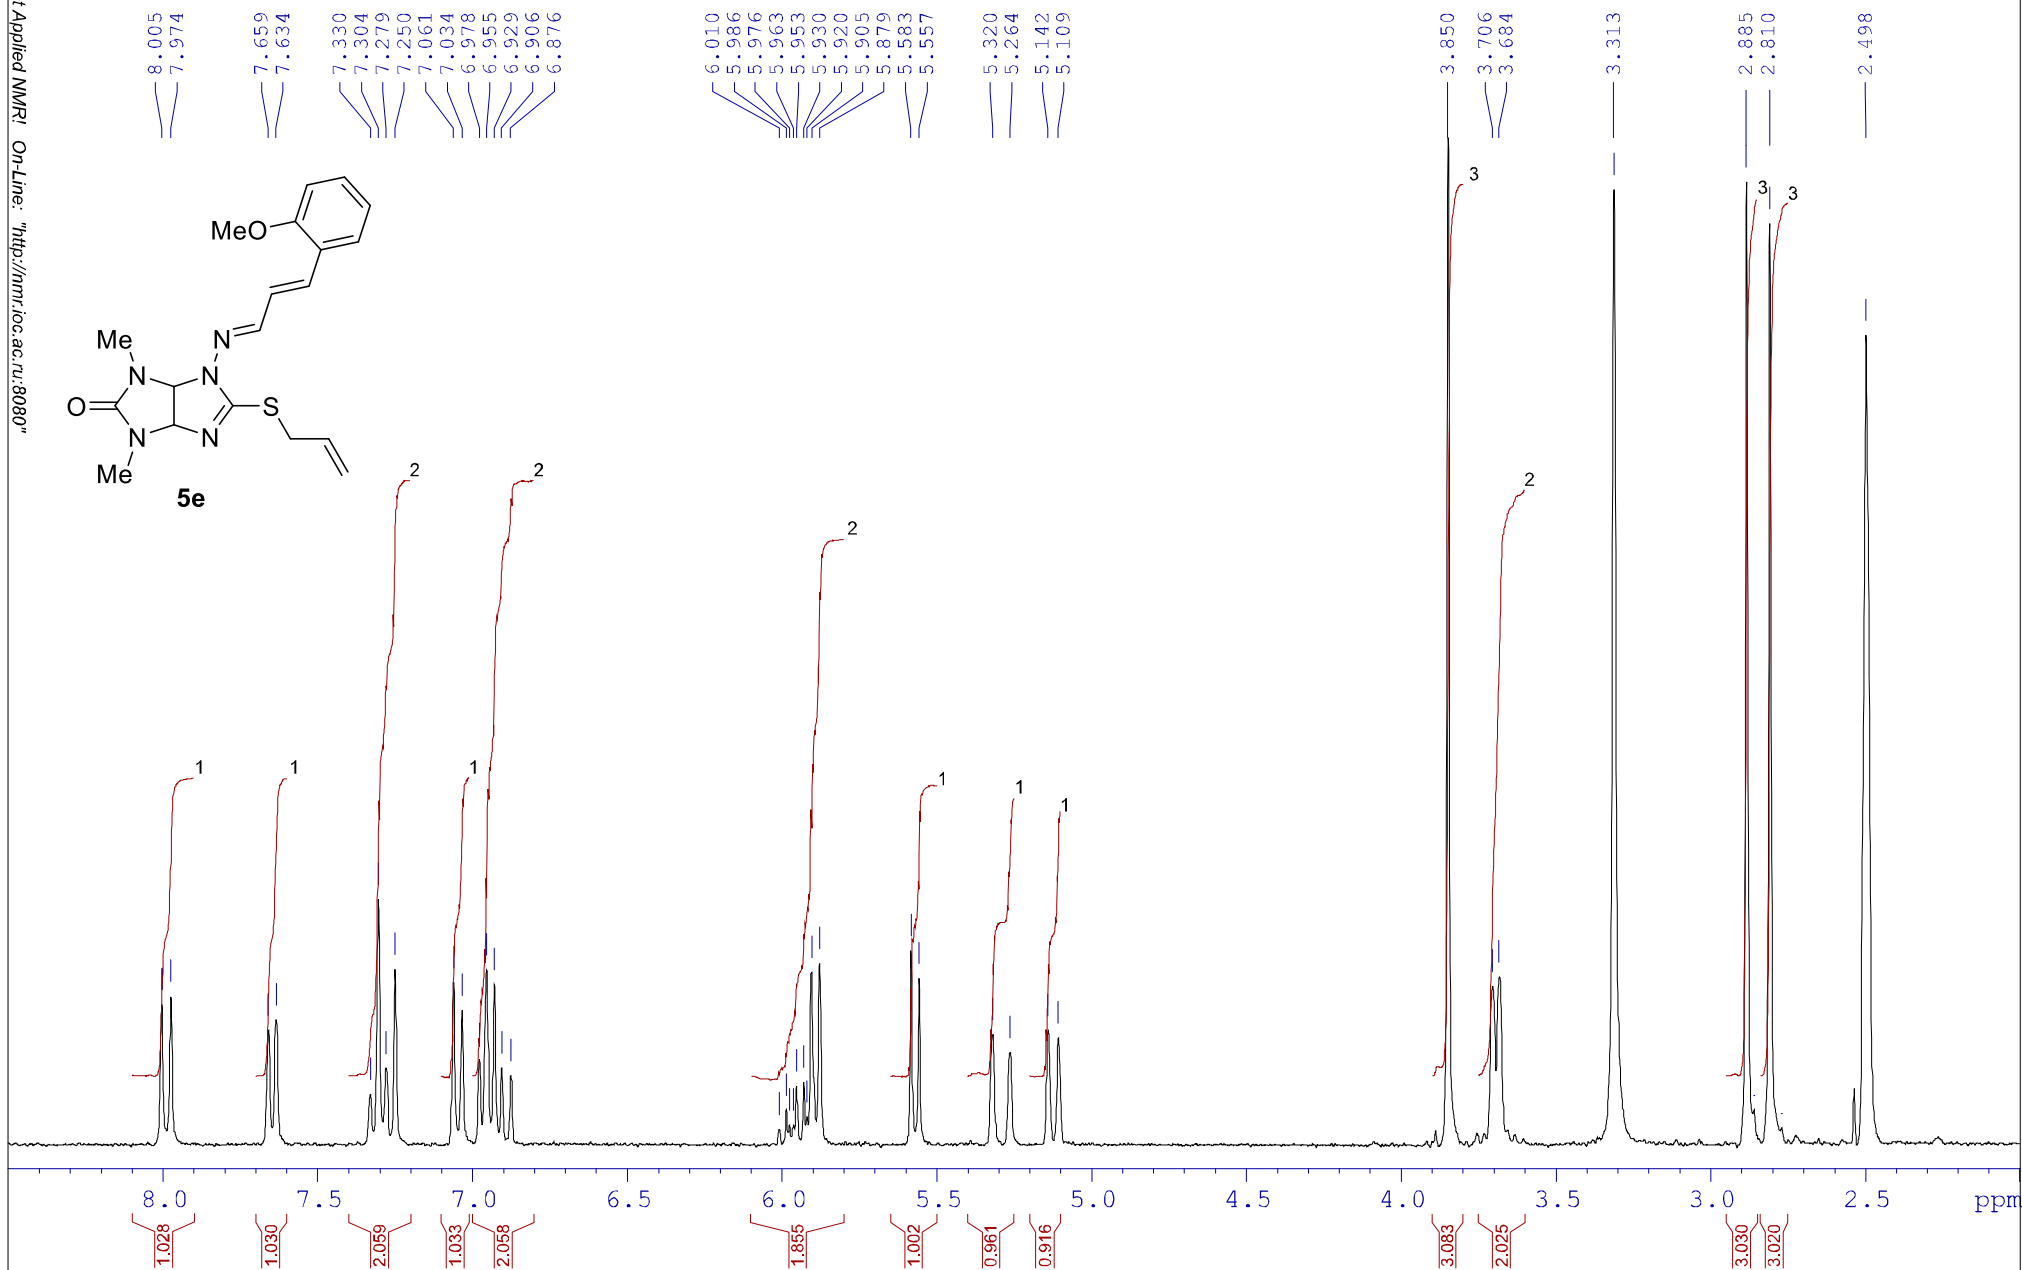

/KANI lav50.1

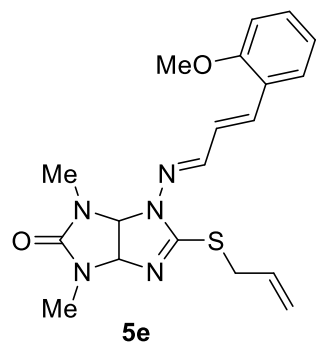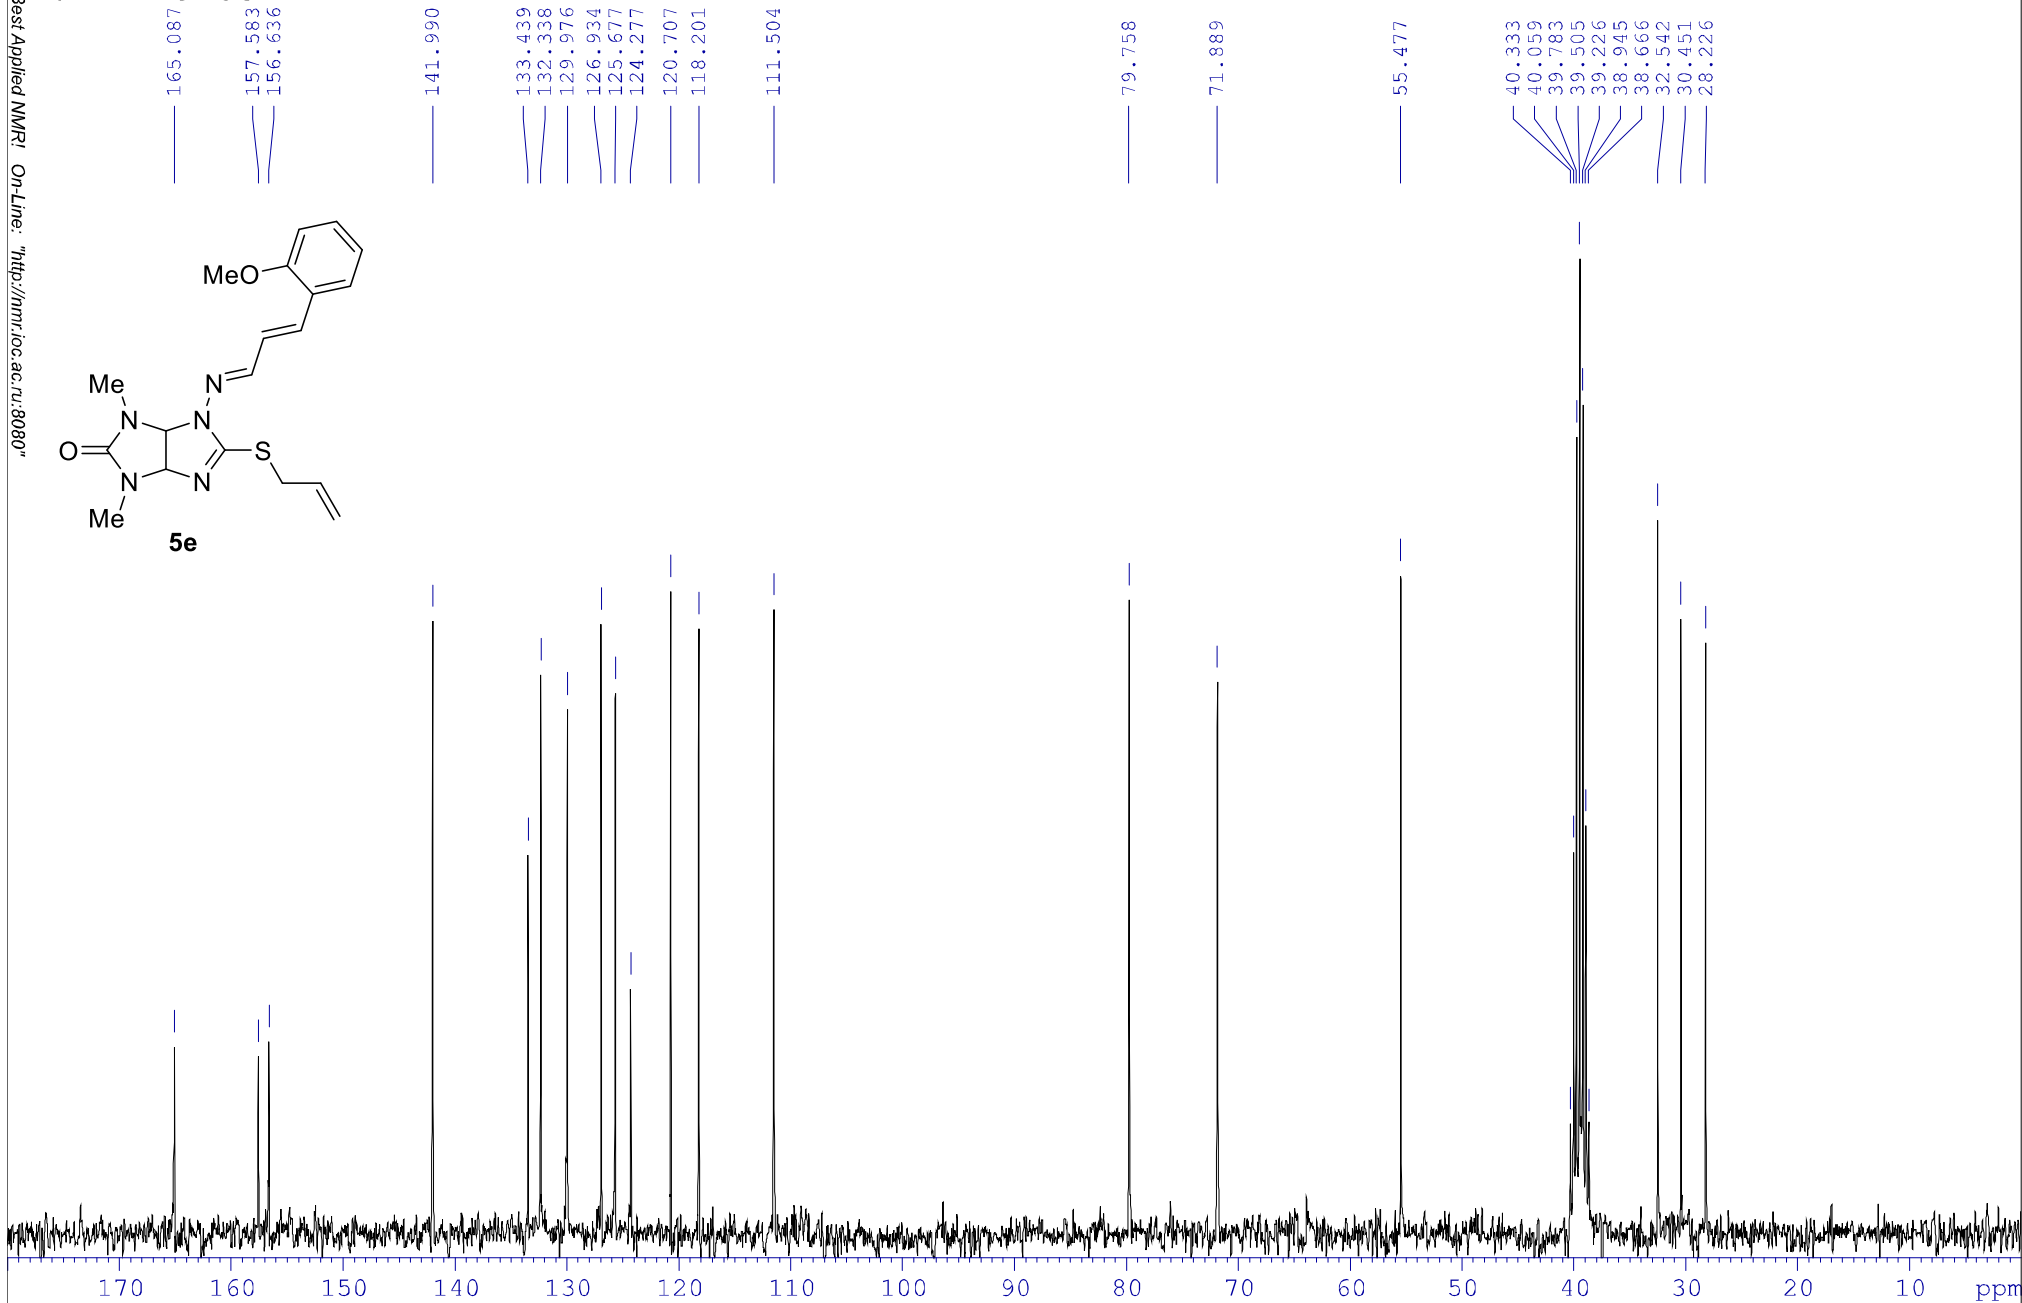

/KANI lav51.1

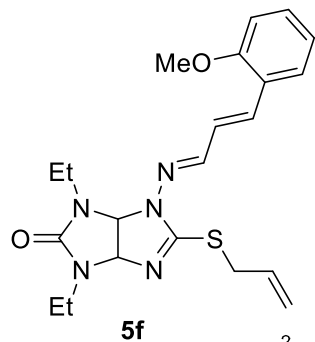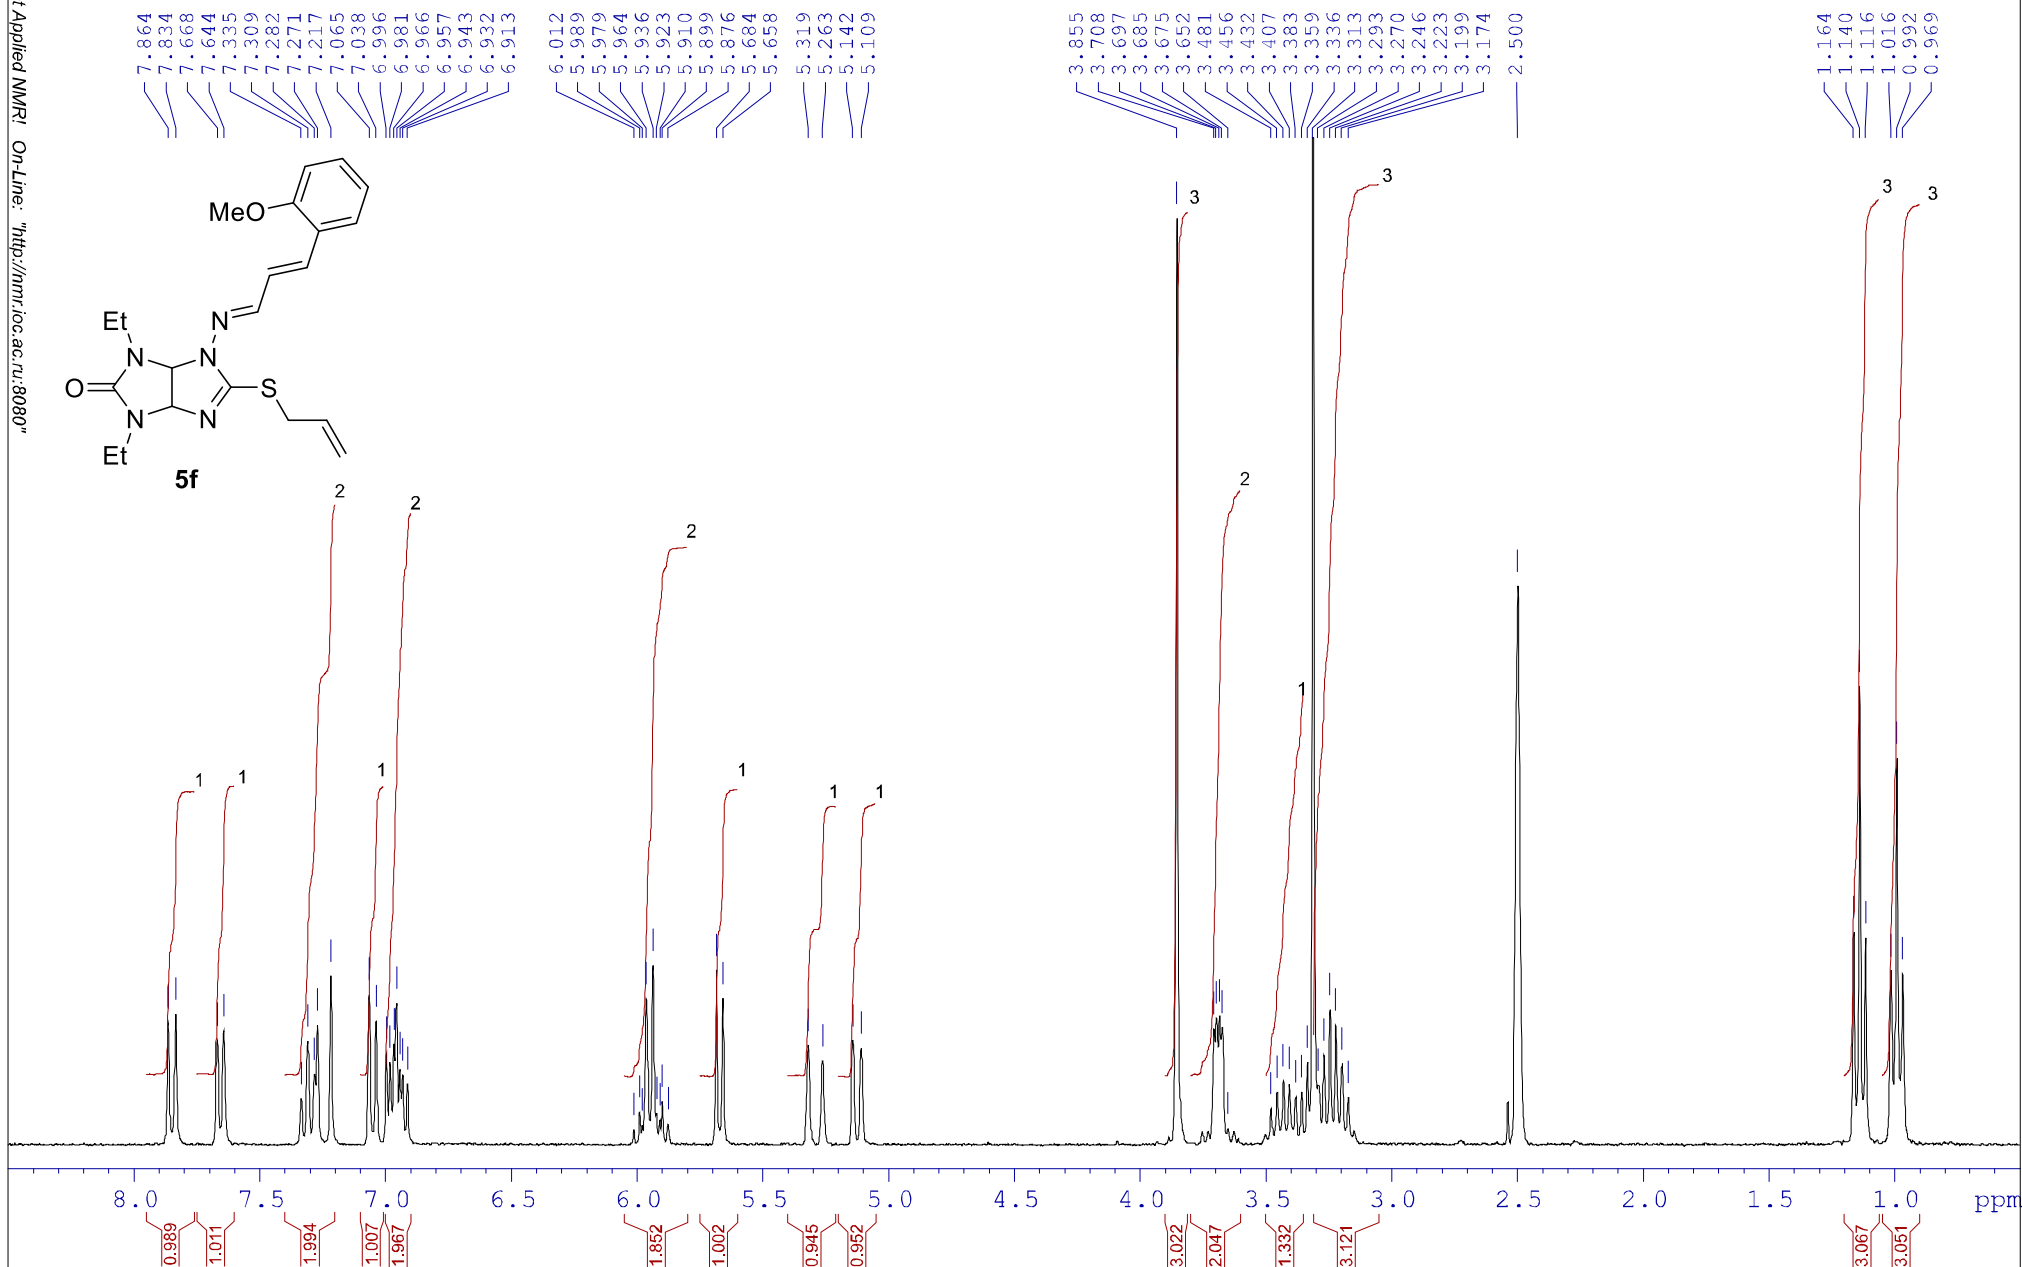



/KANI lav51.1

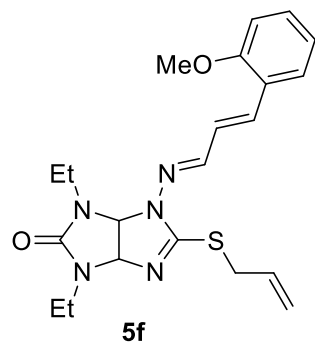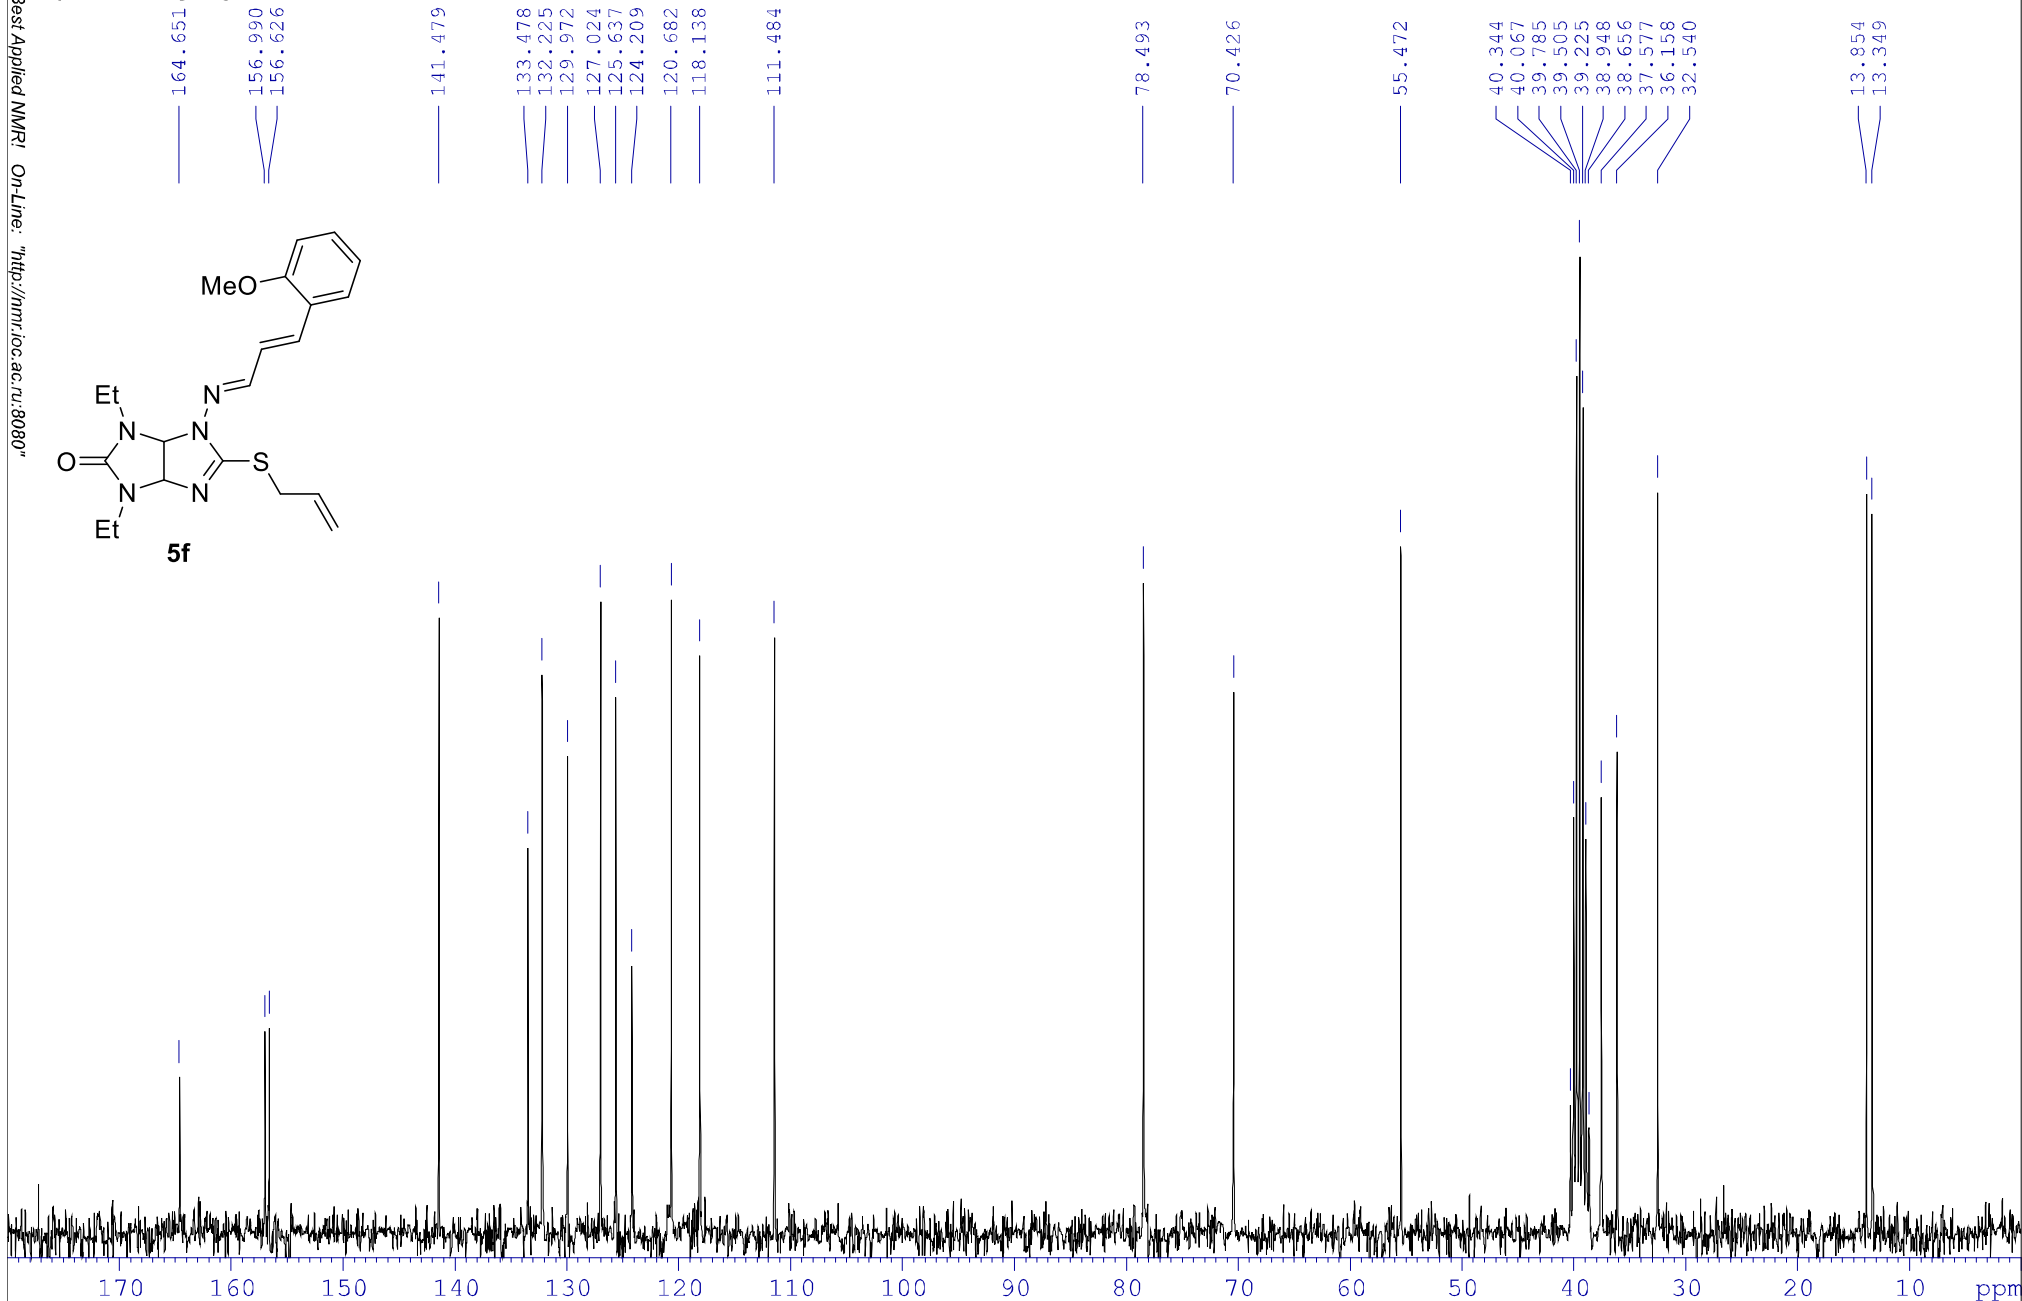

/KANI VEE186.1

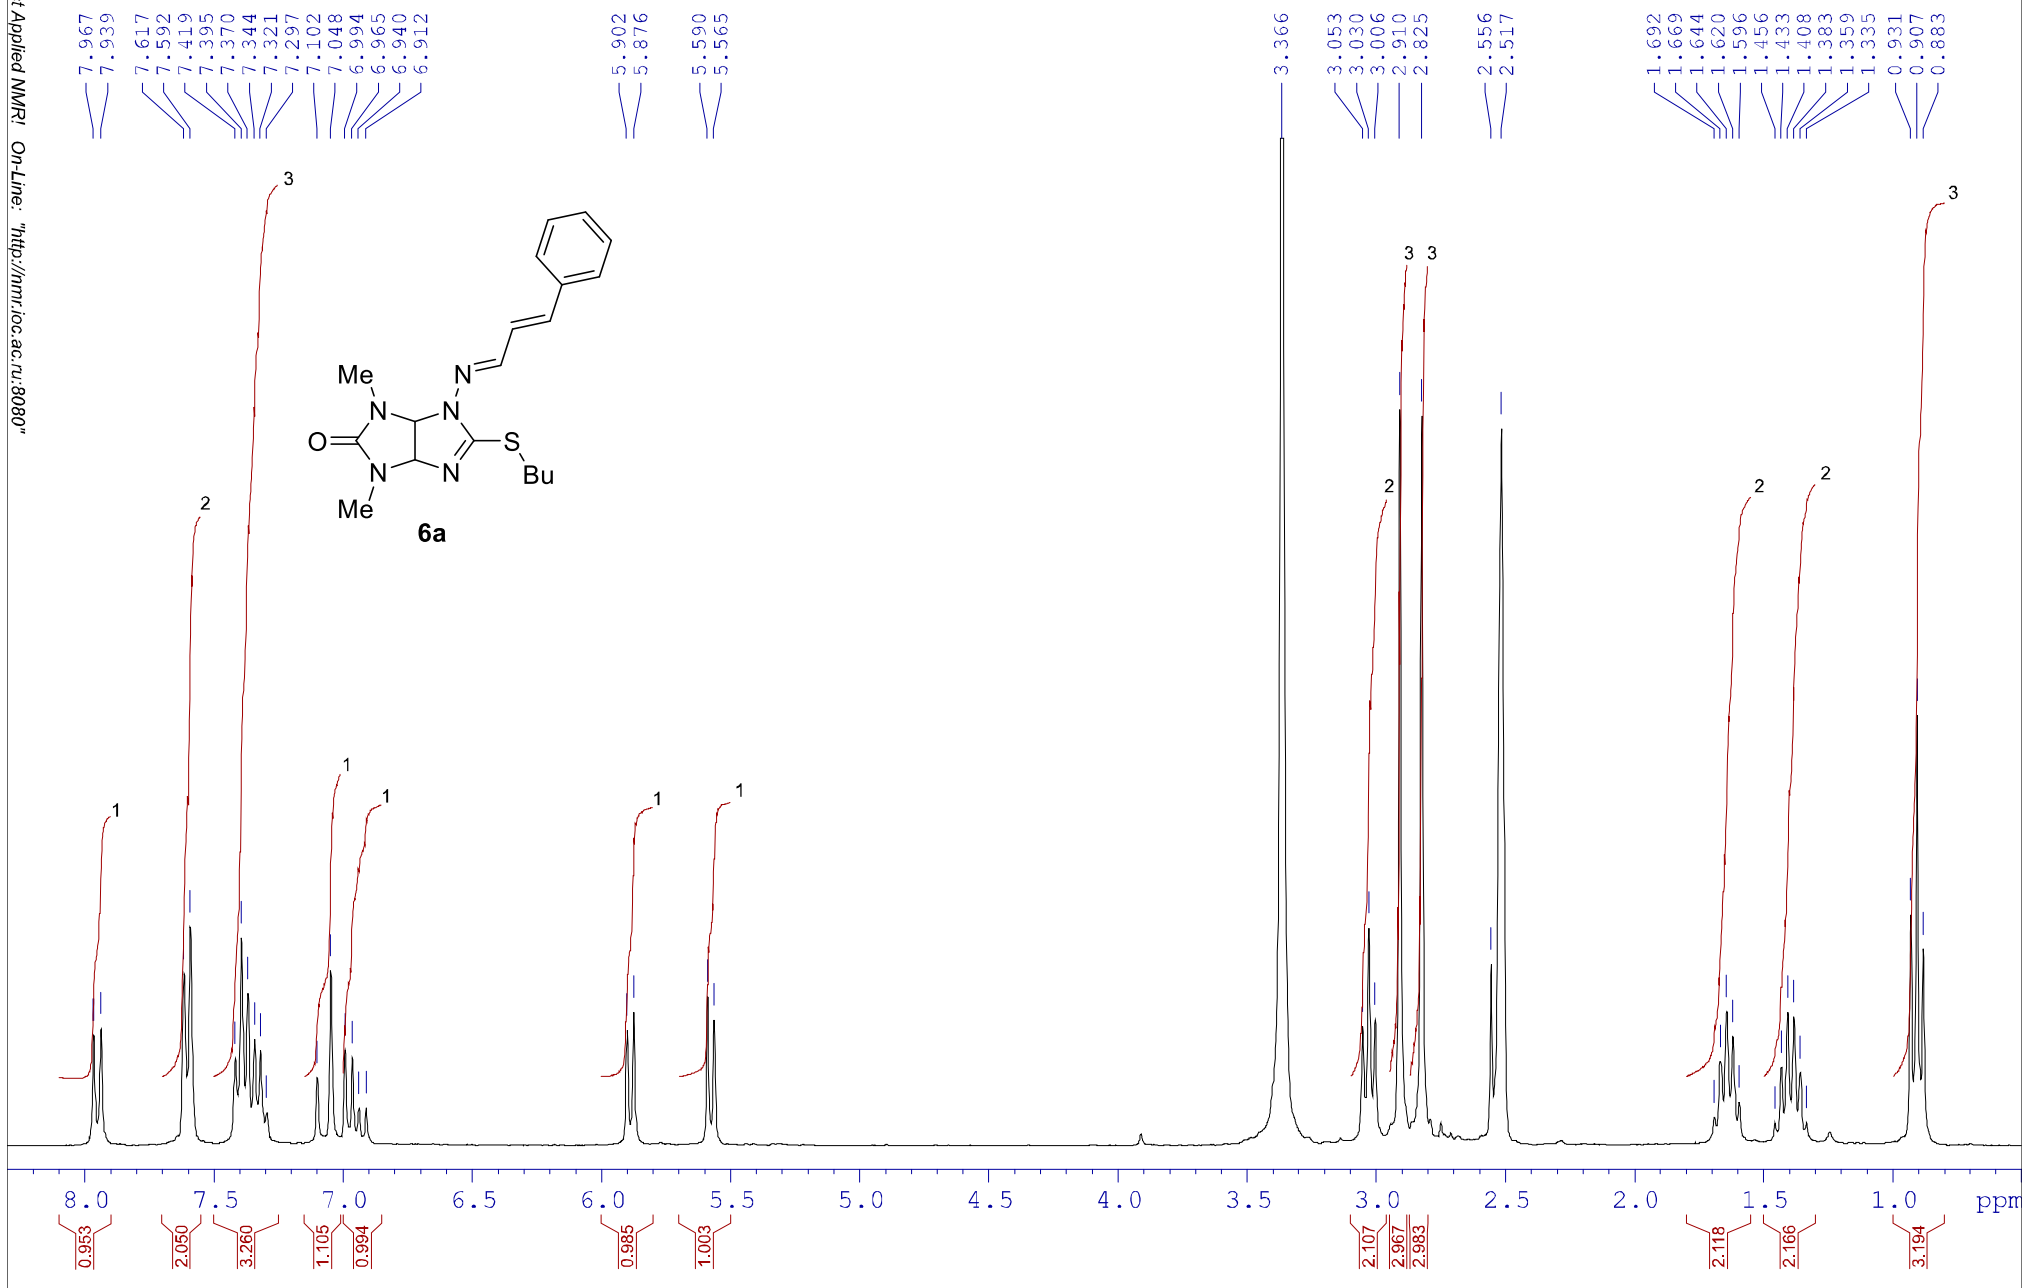

/KANI VEE186.1

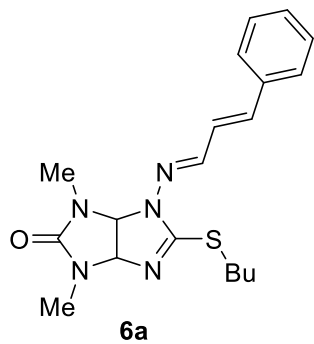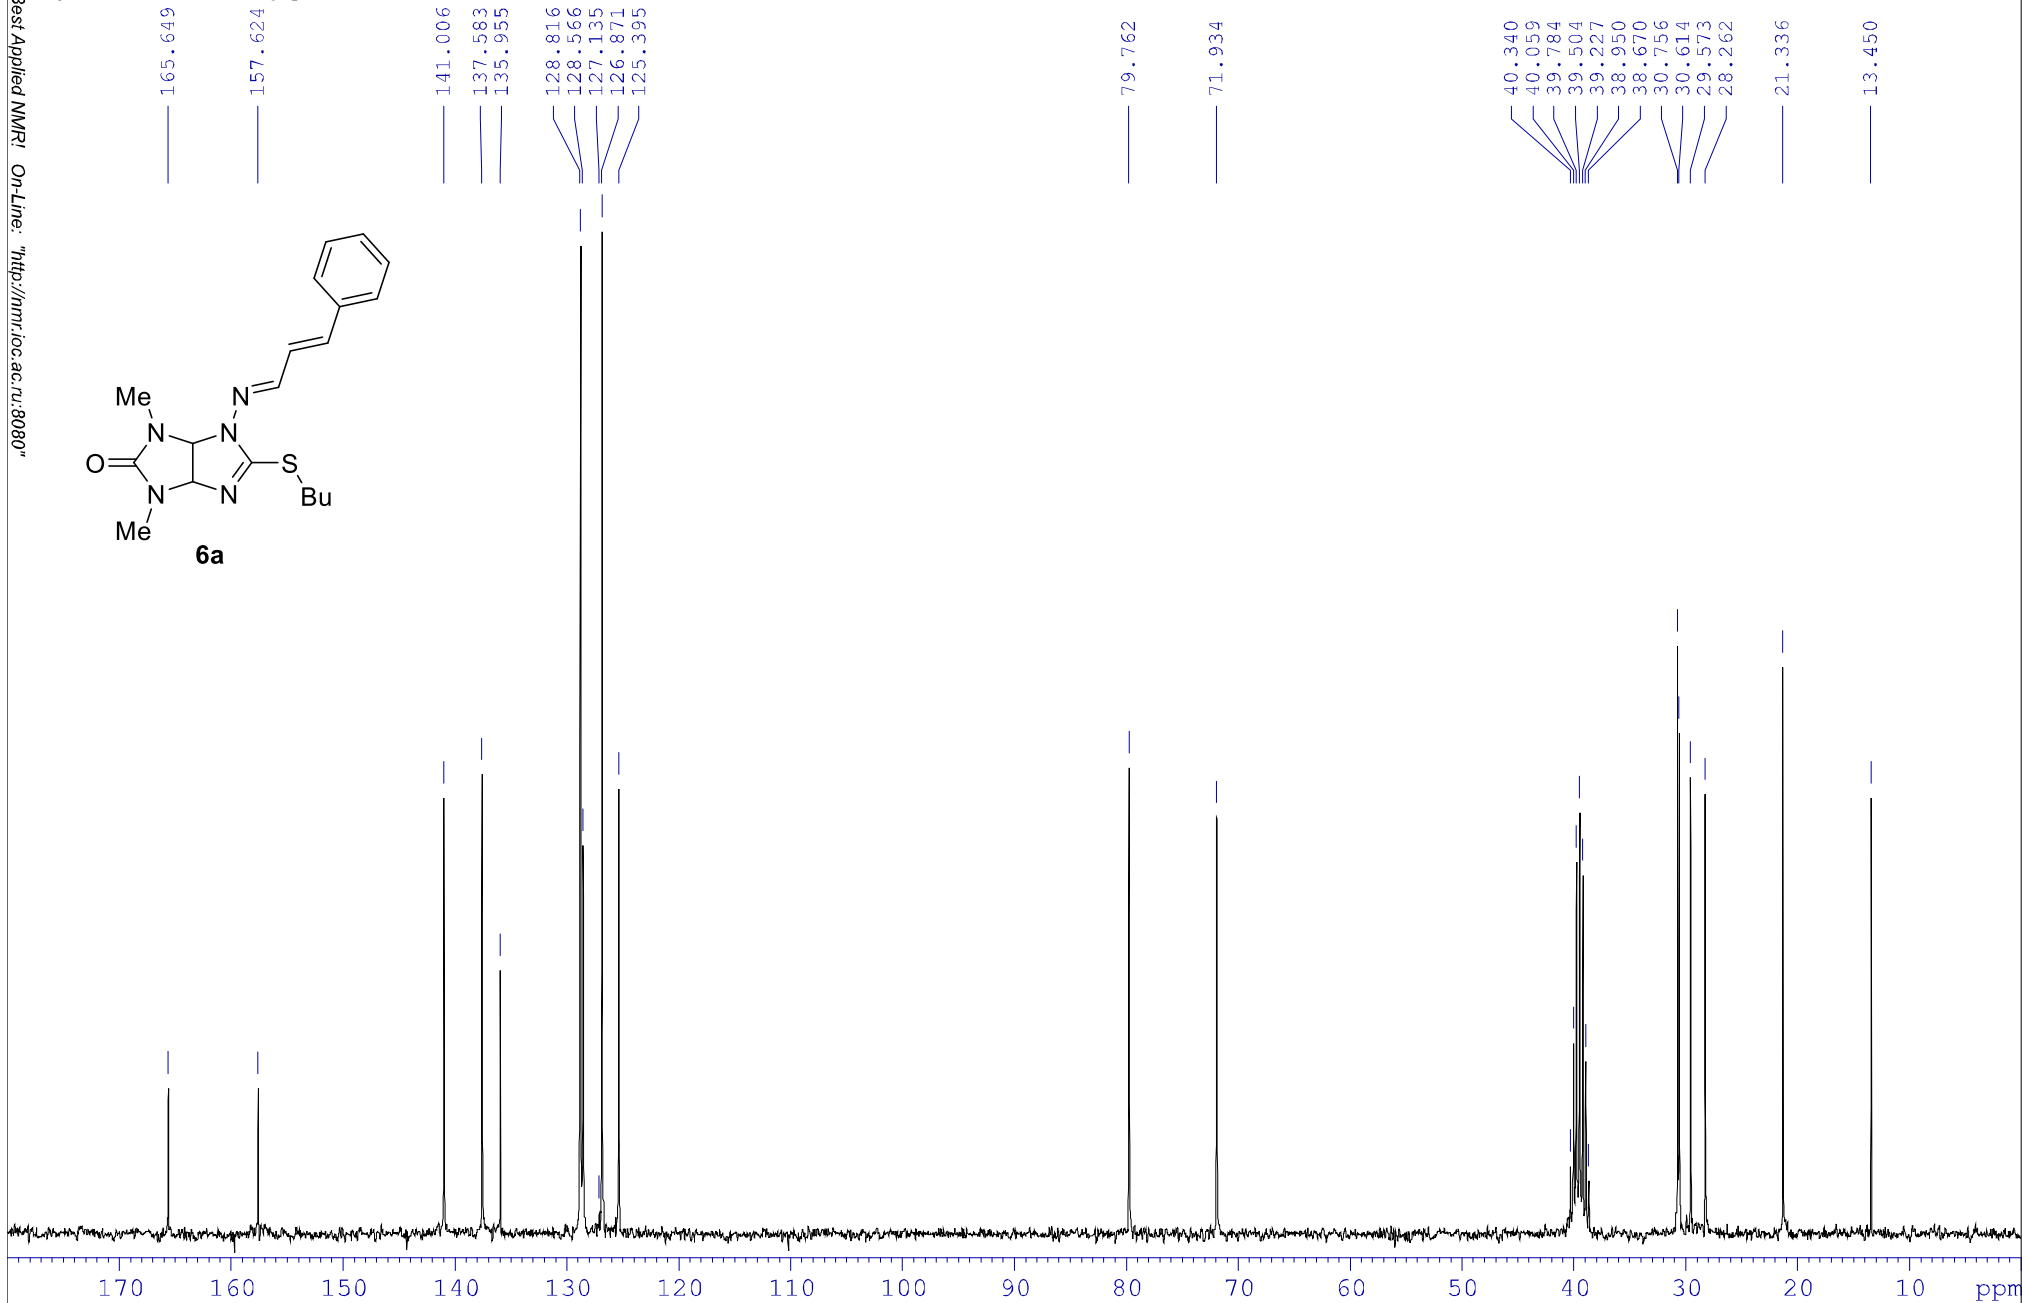

# /KANI VEE207.1 Gazieva-00765

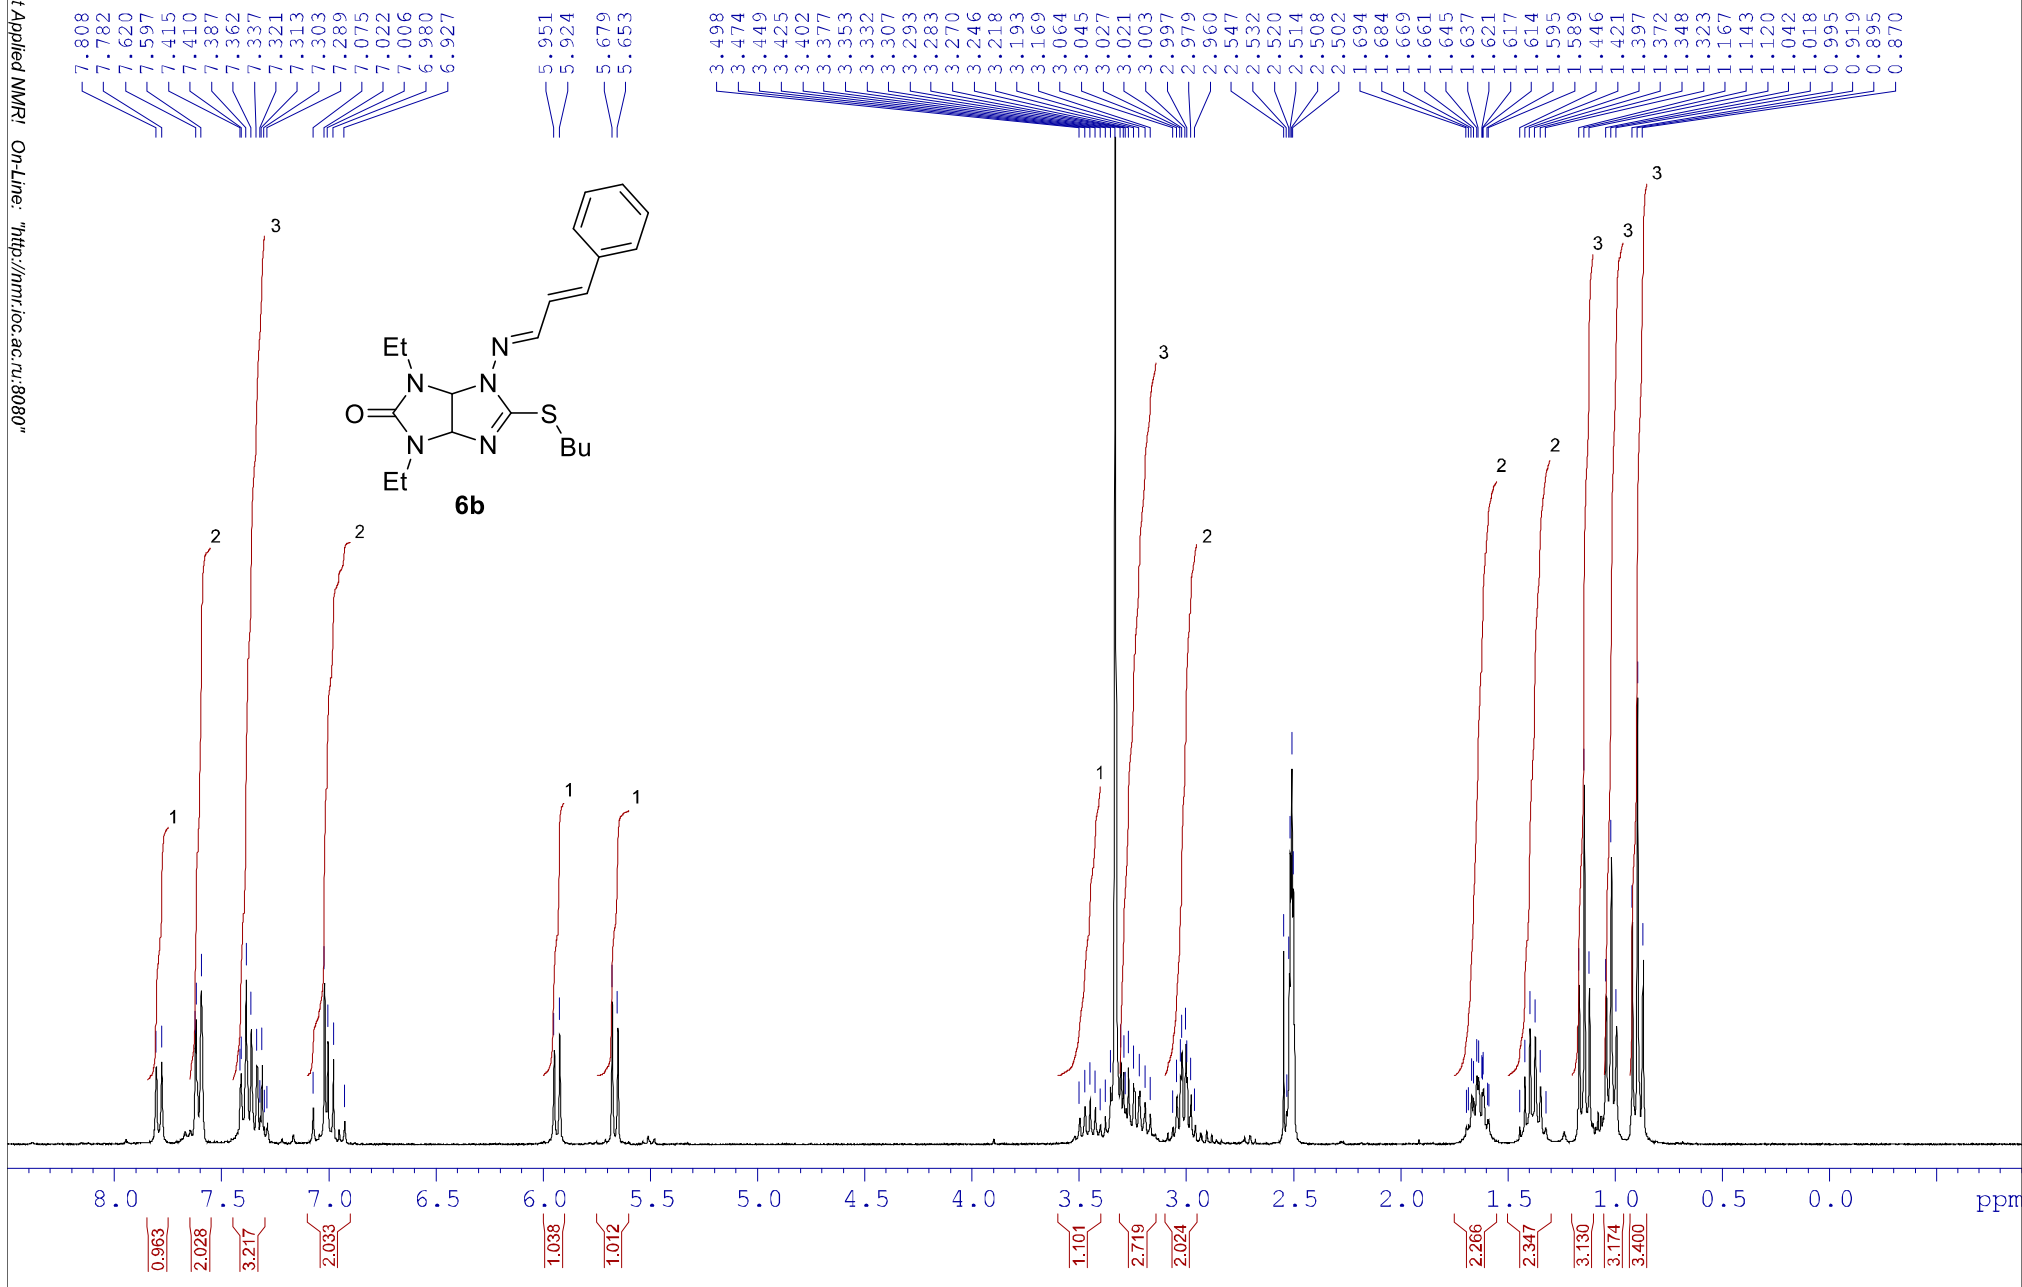

/KANI VEE207.1

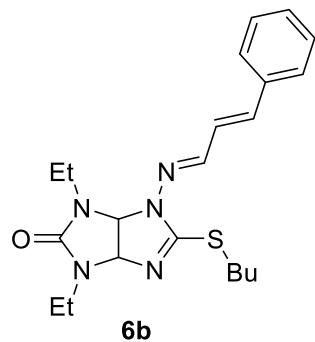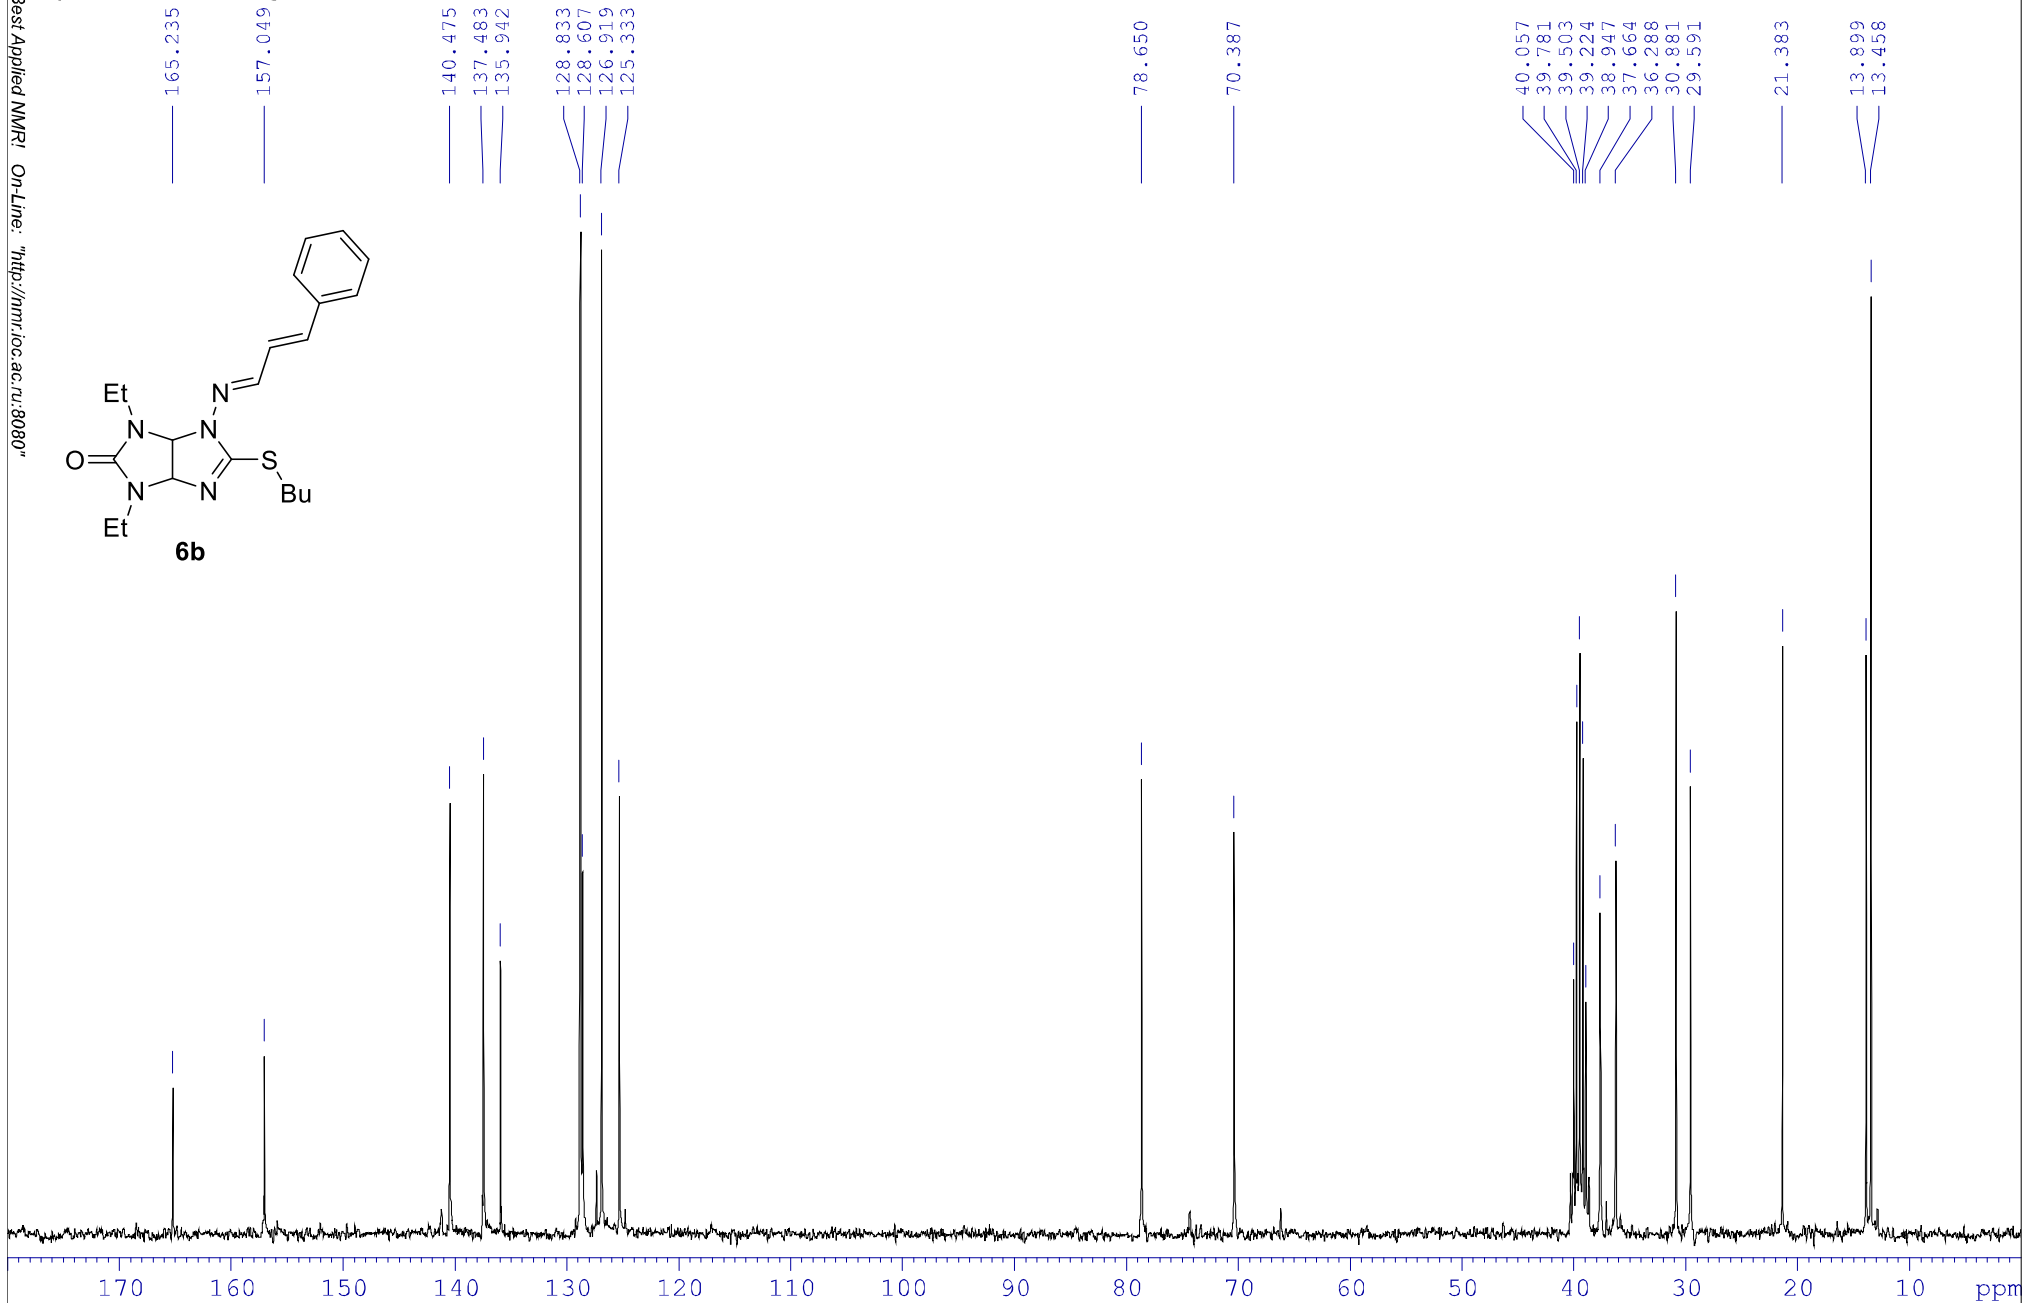

/KANI VEE226.1 Gazieva-00765

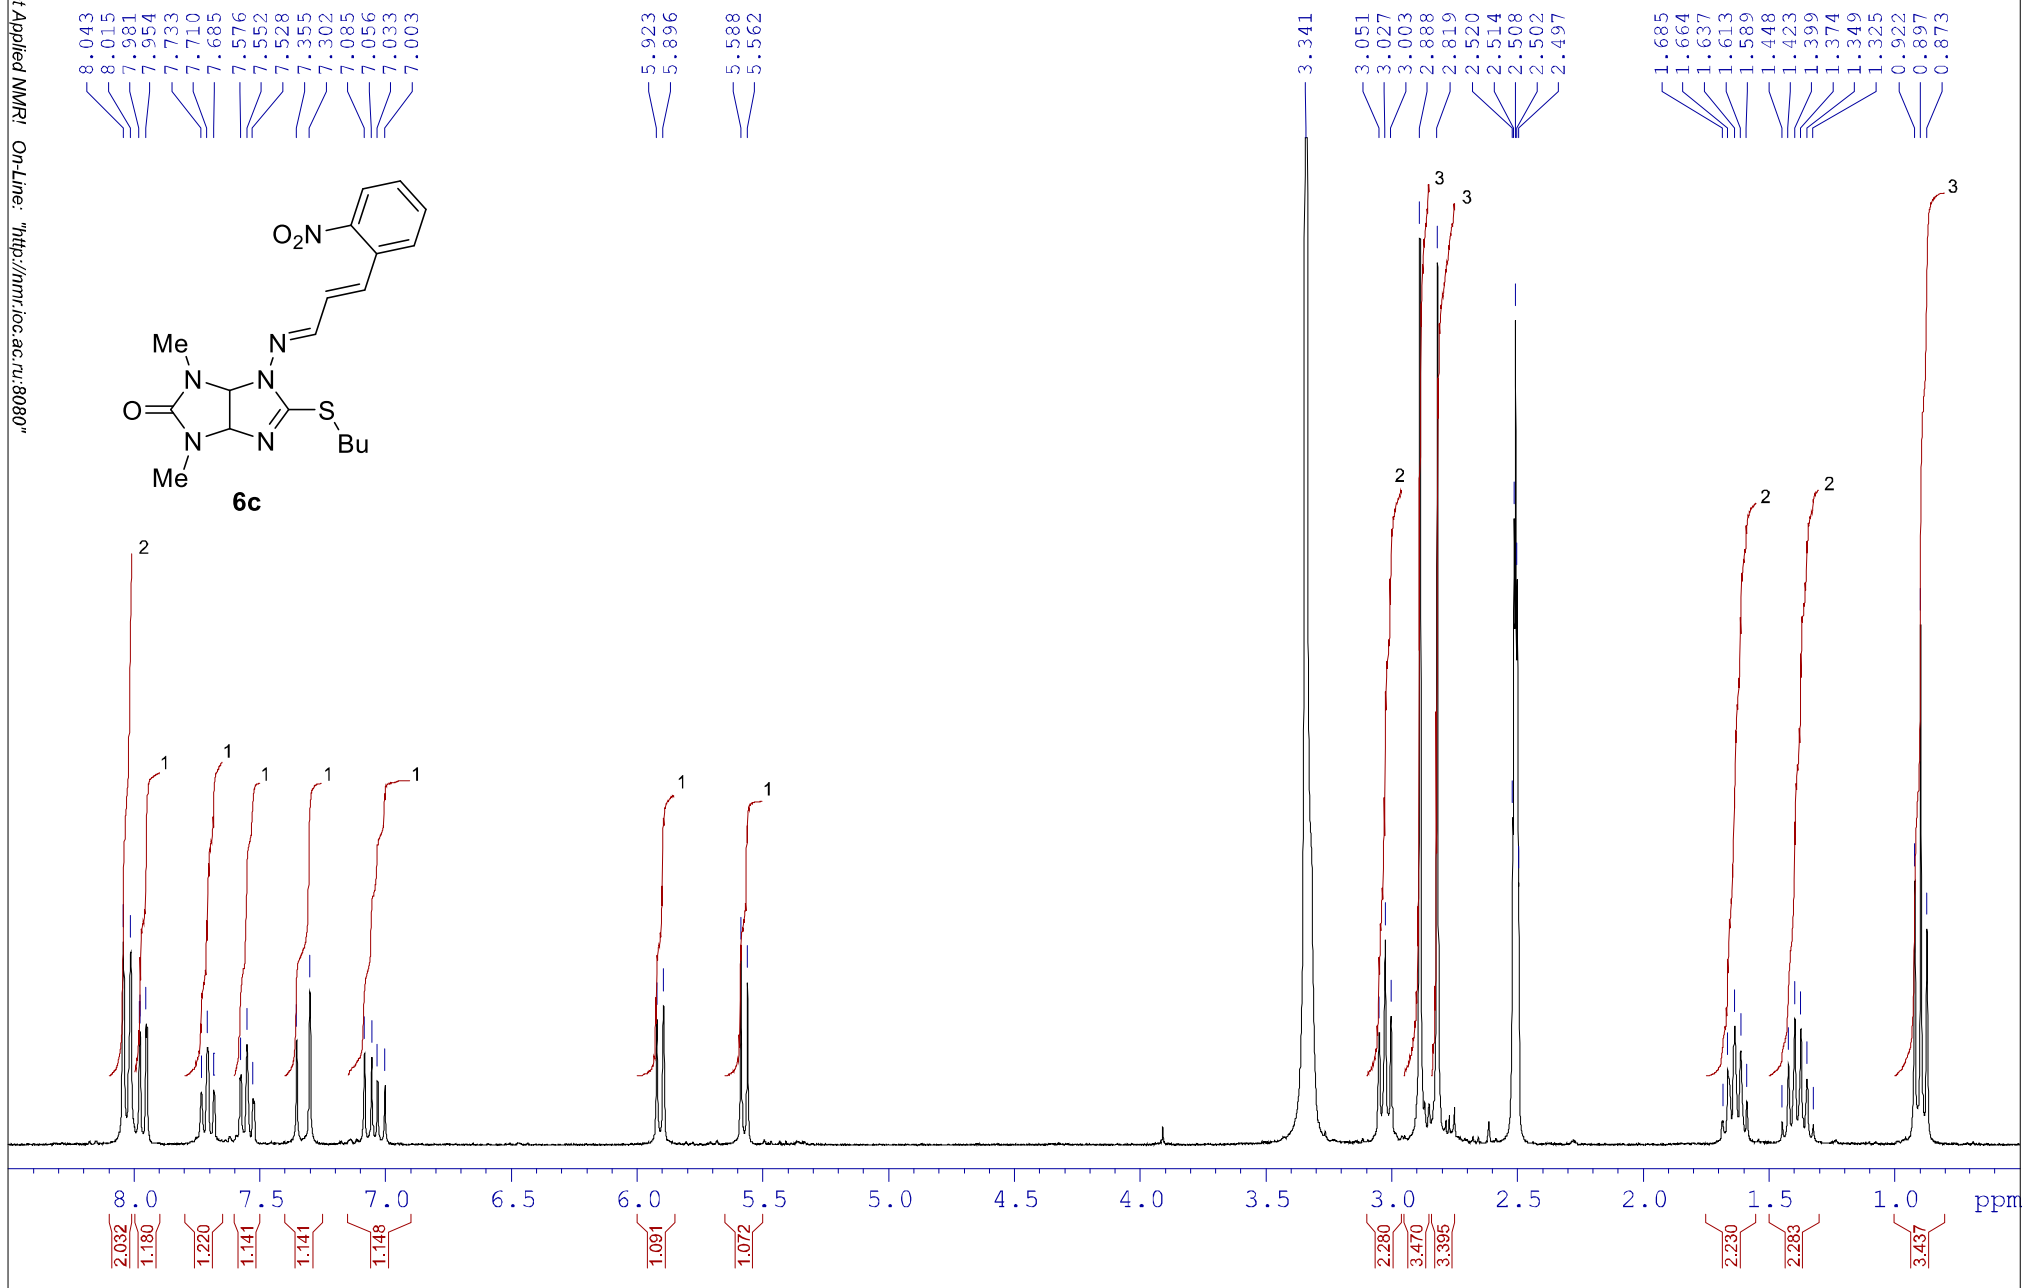

/KANI VEE226.2

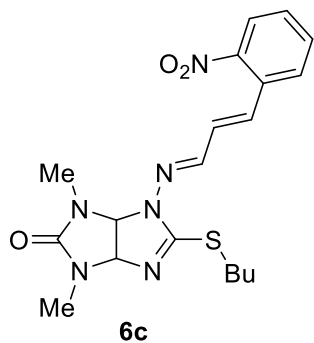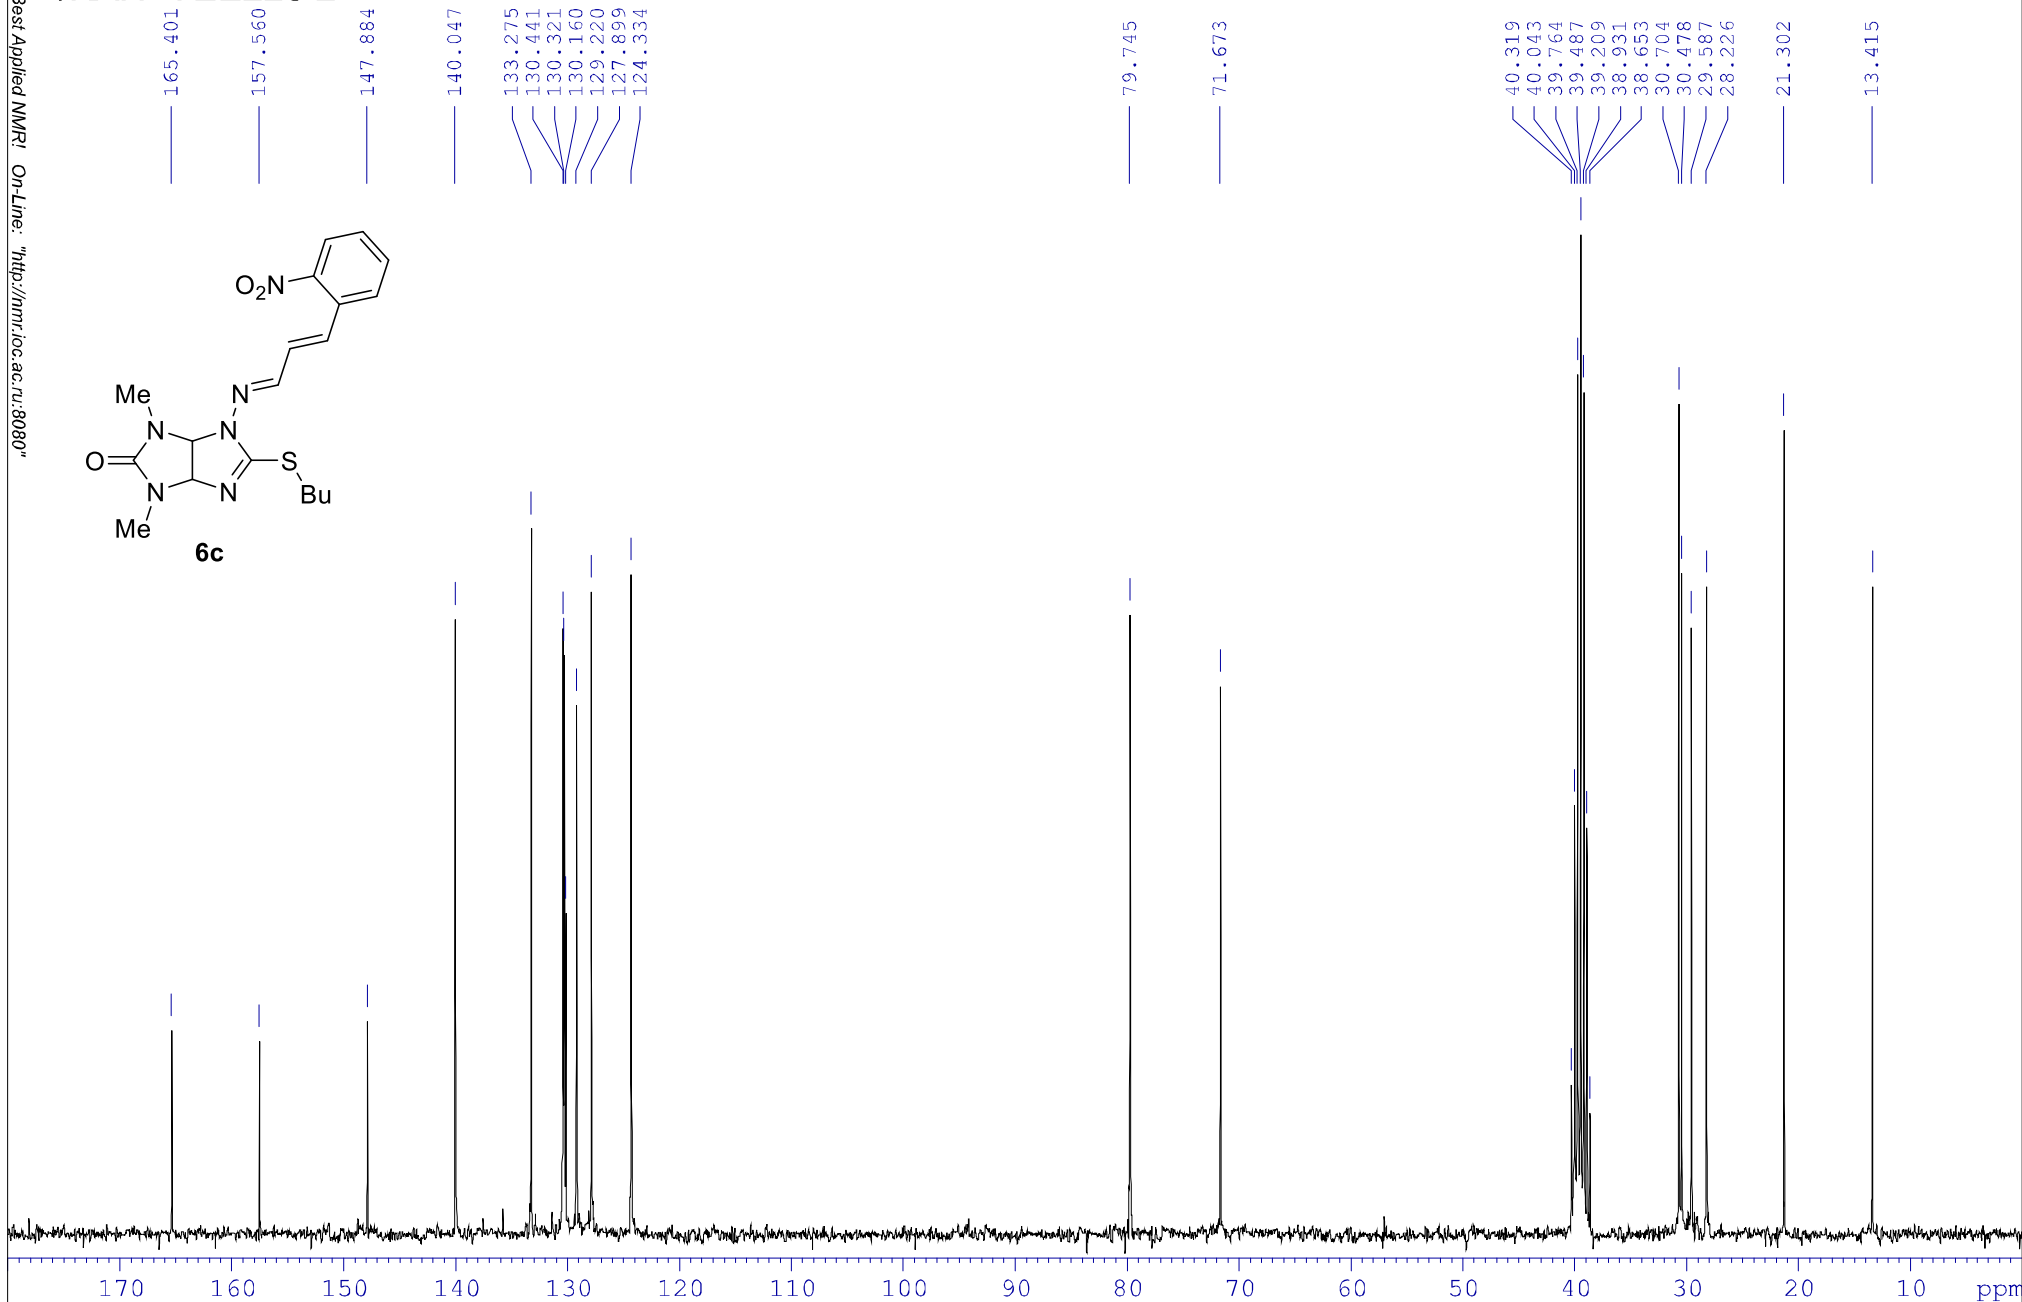

# /KANI VEE227.1 Gazieva-00765

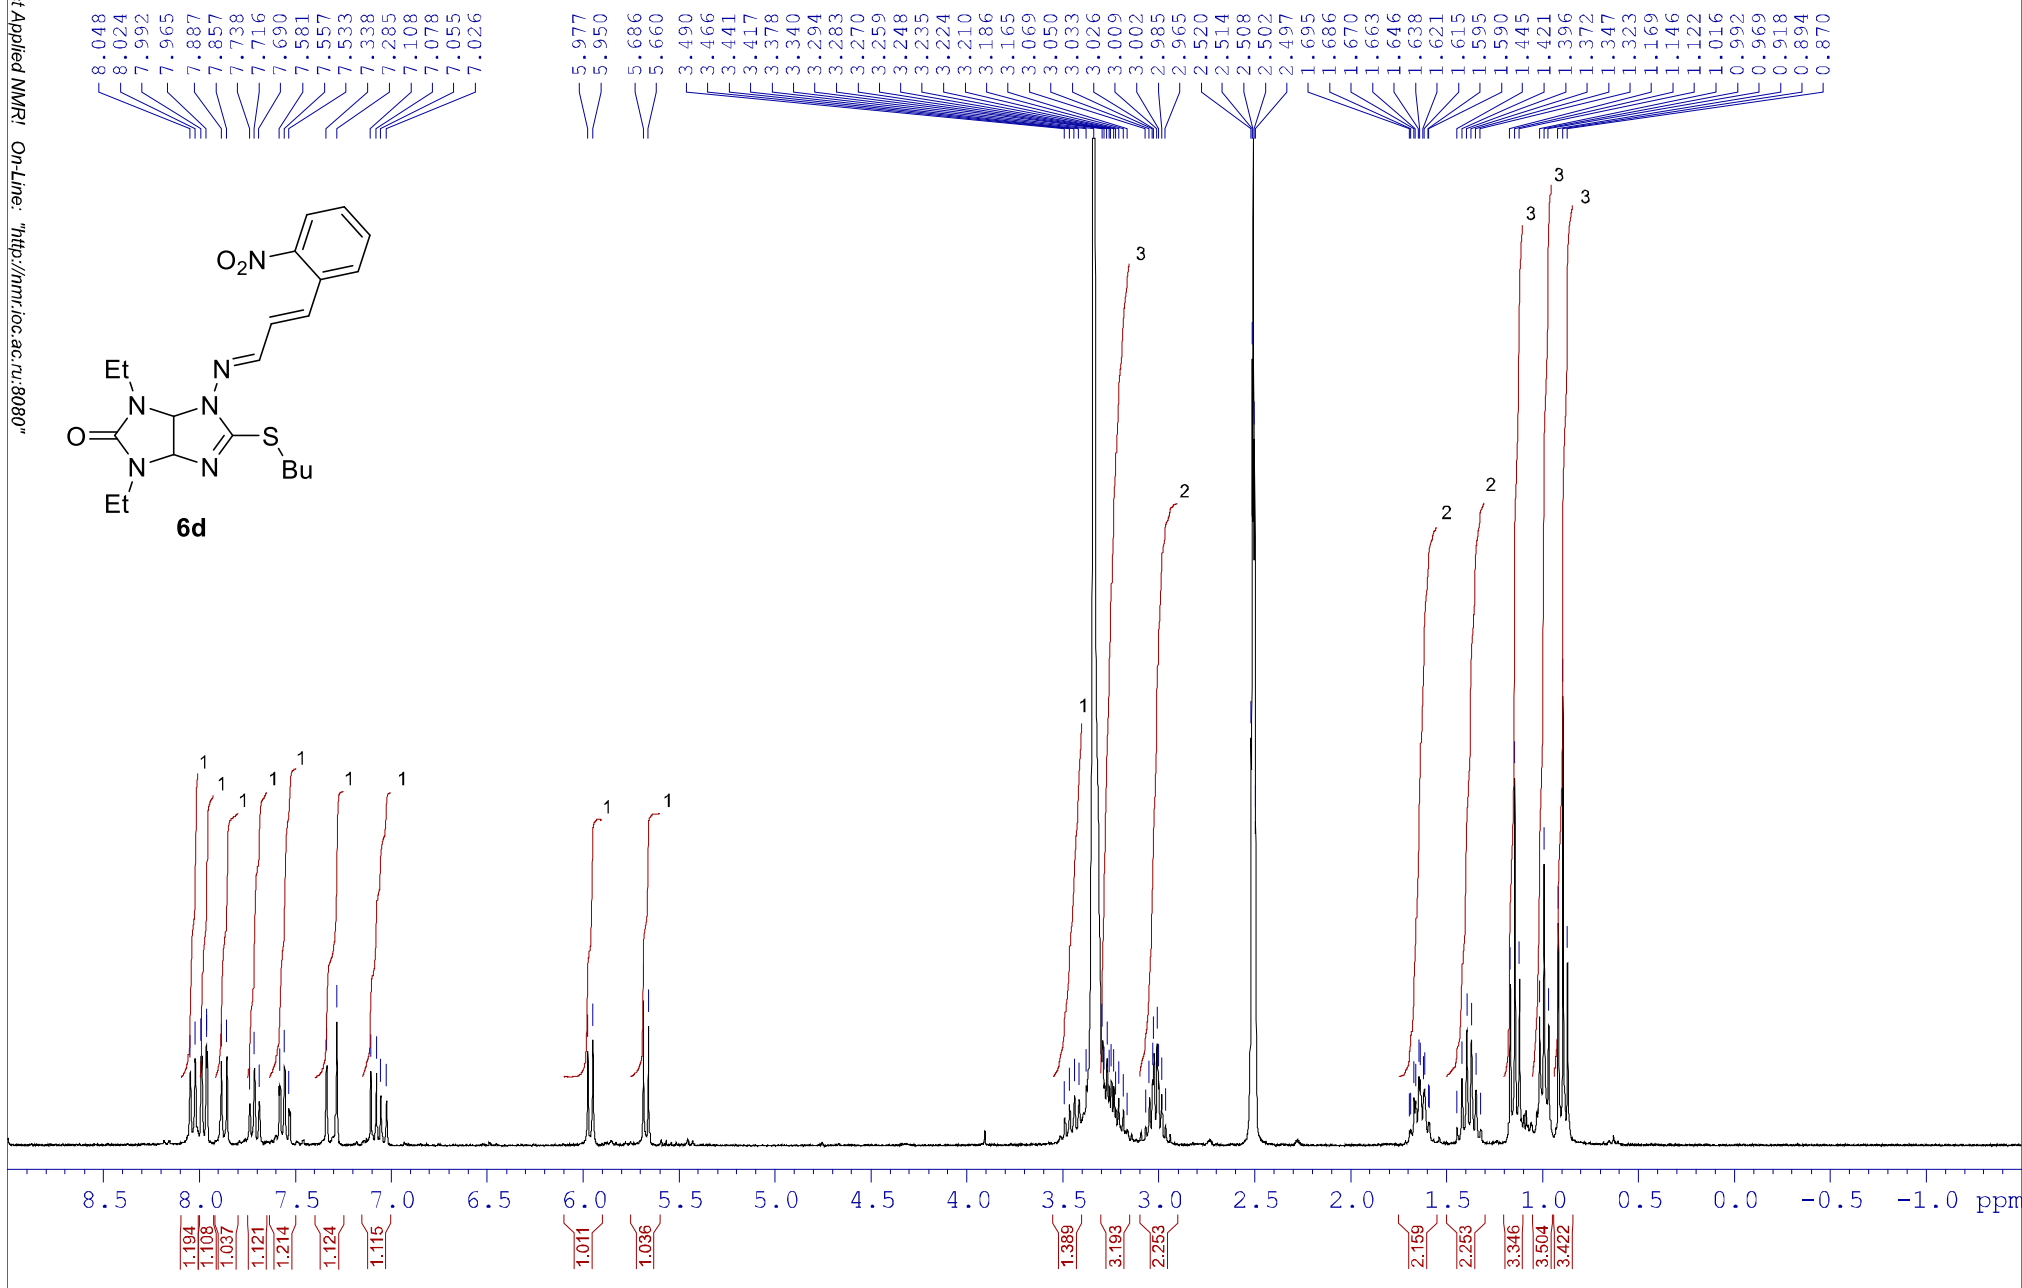



/KANI VEE227.2

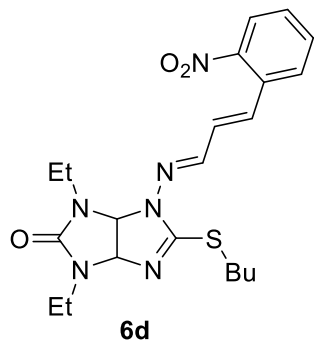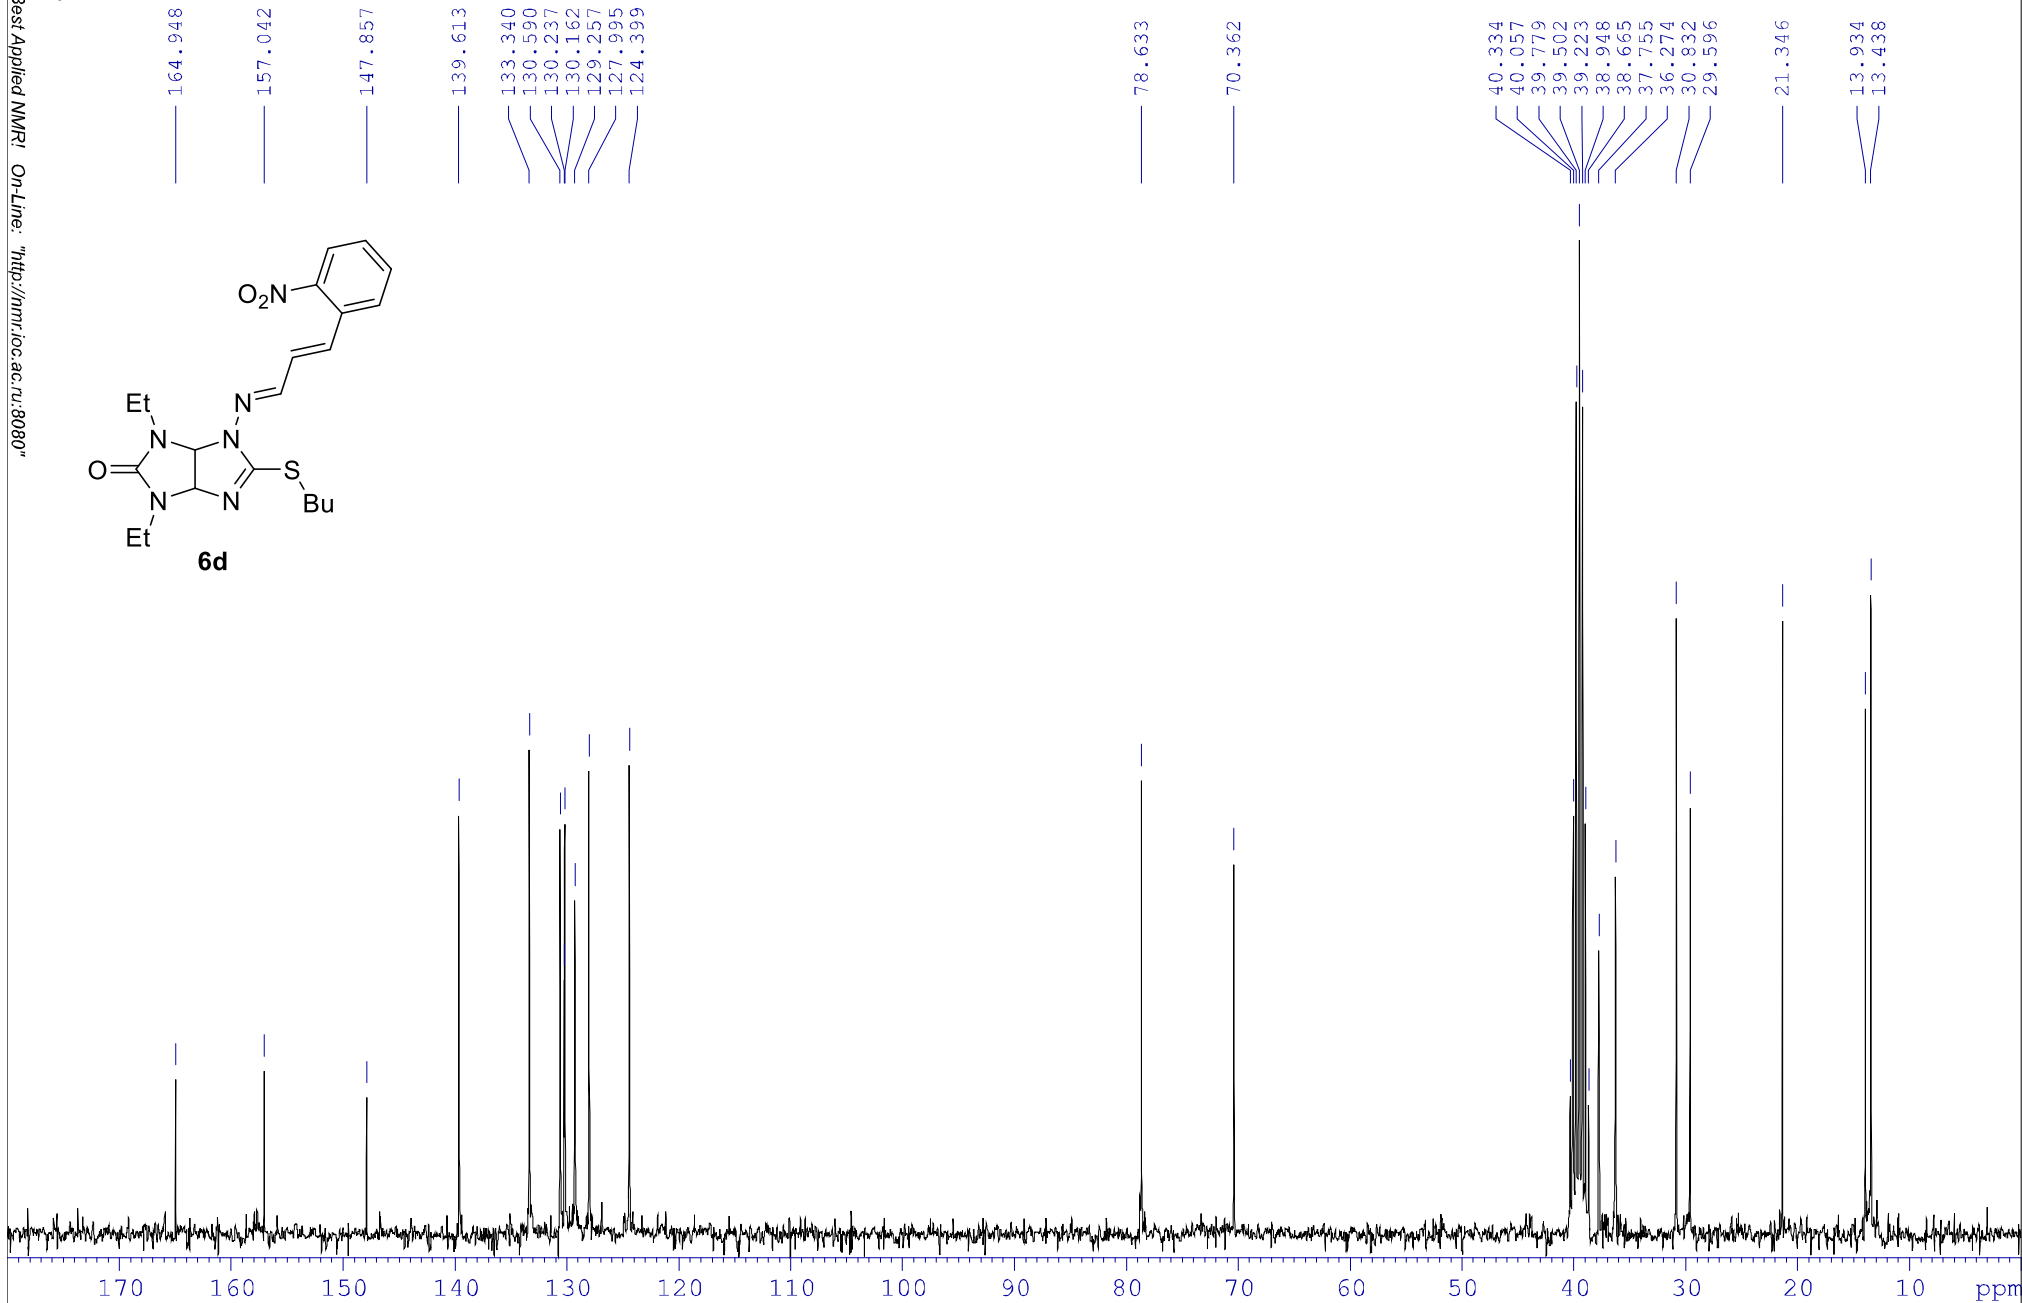

/KANI VEE211.2

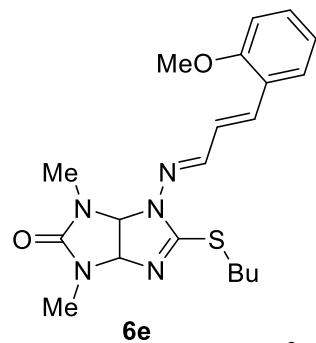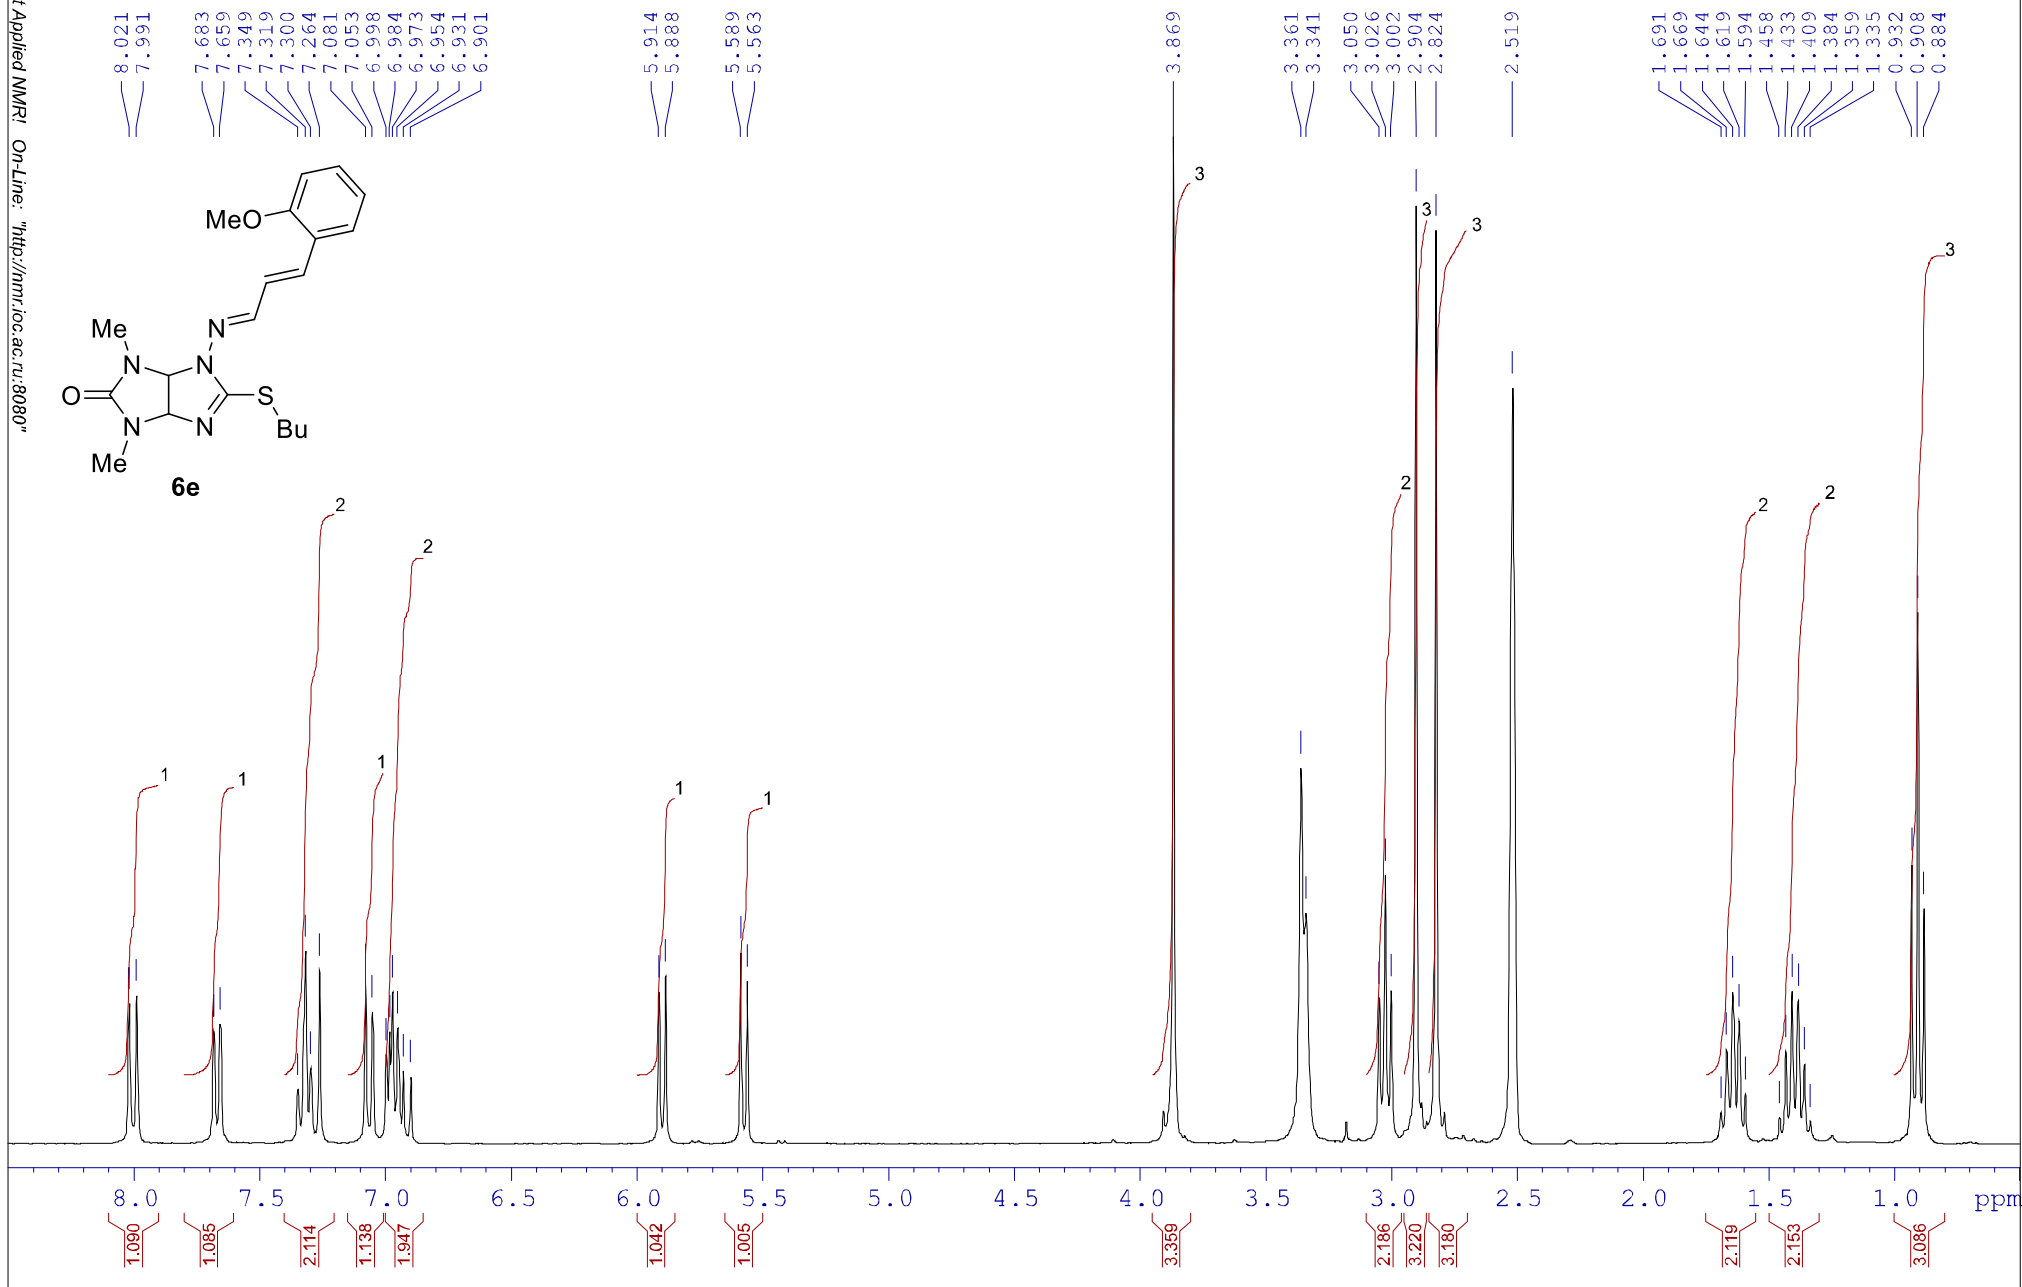

/KANI VEE211.2

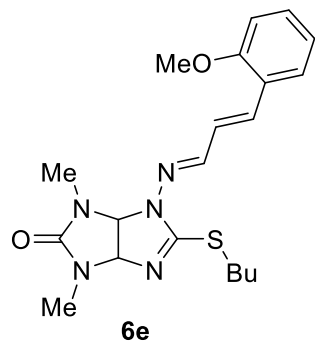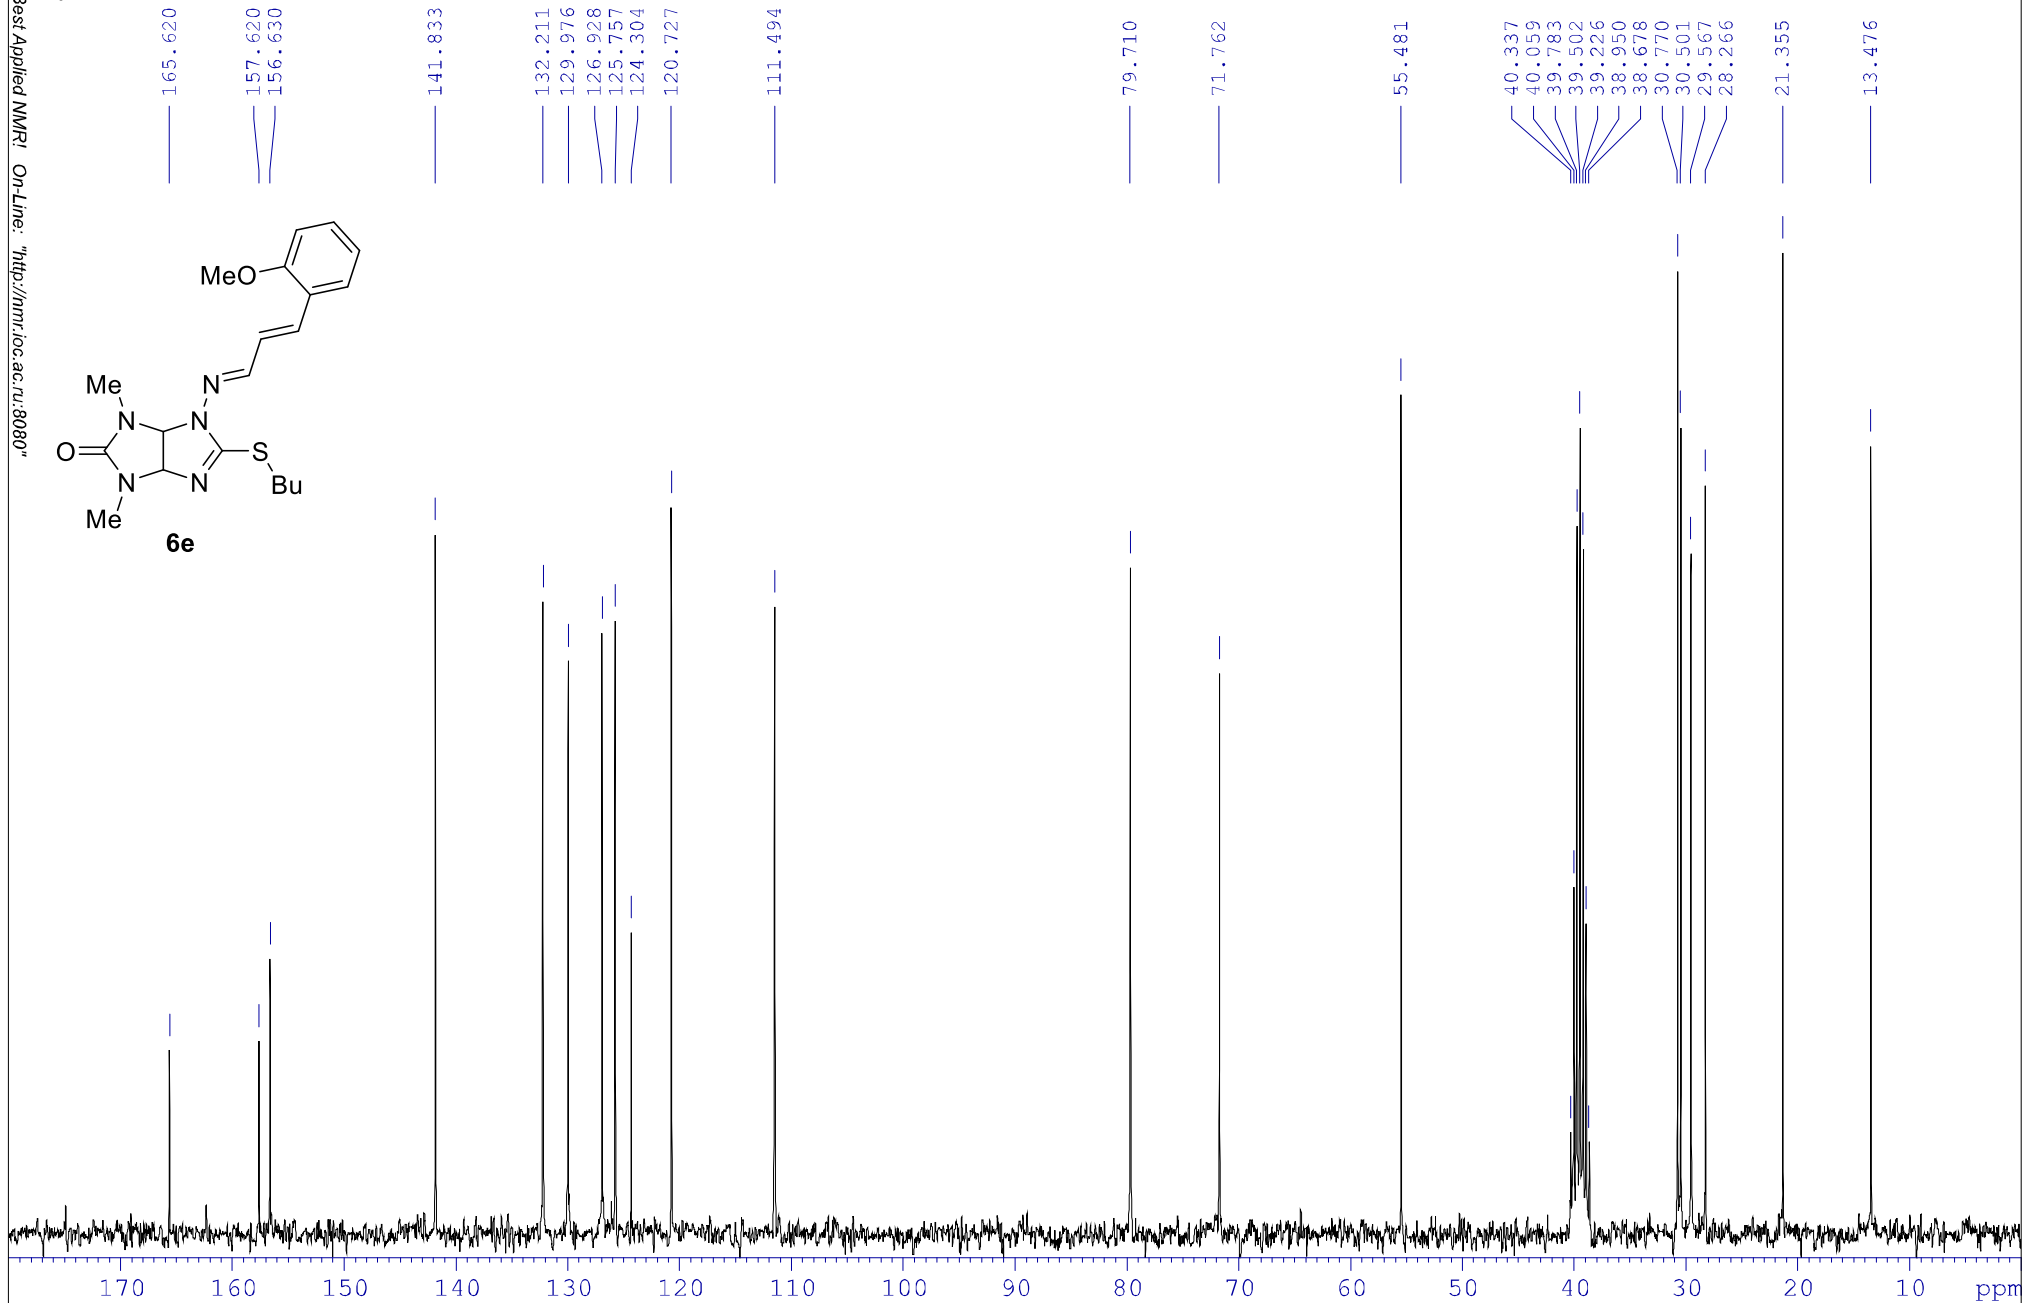

/KANI VEE187.2

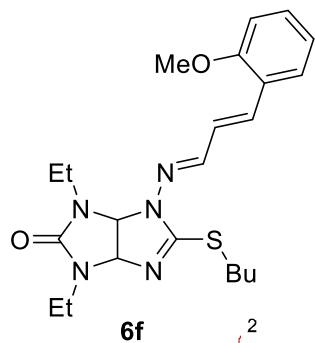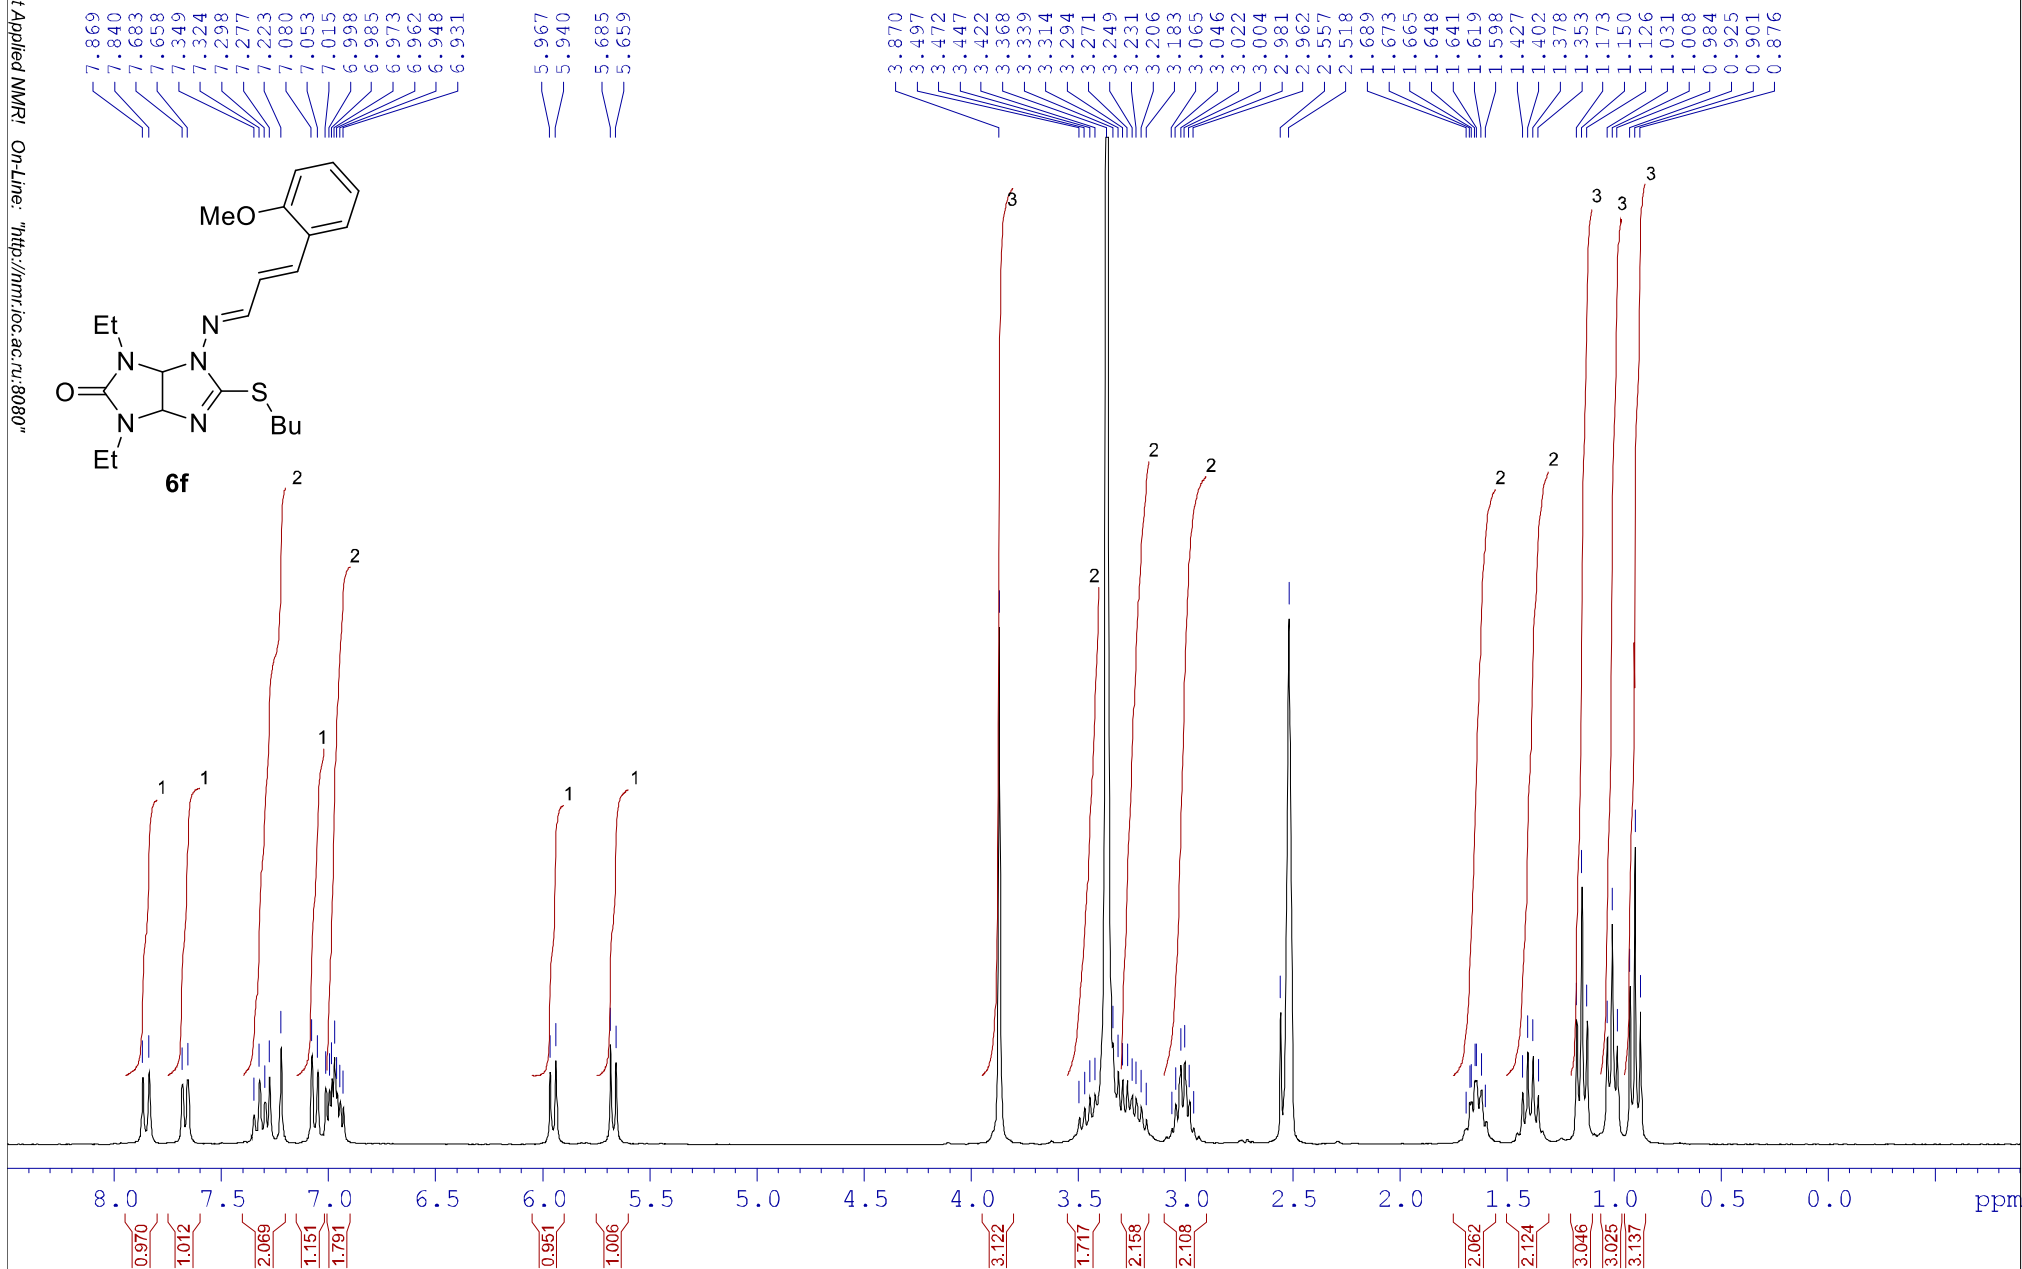

/KANI VEE187.2

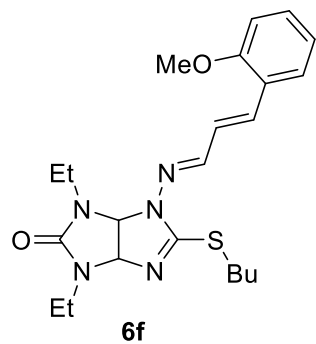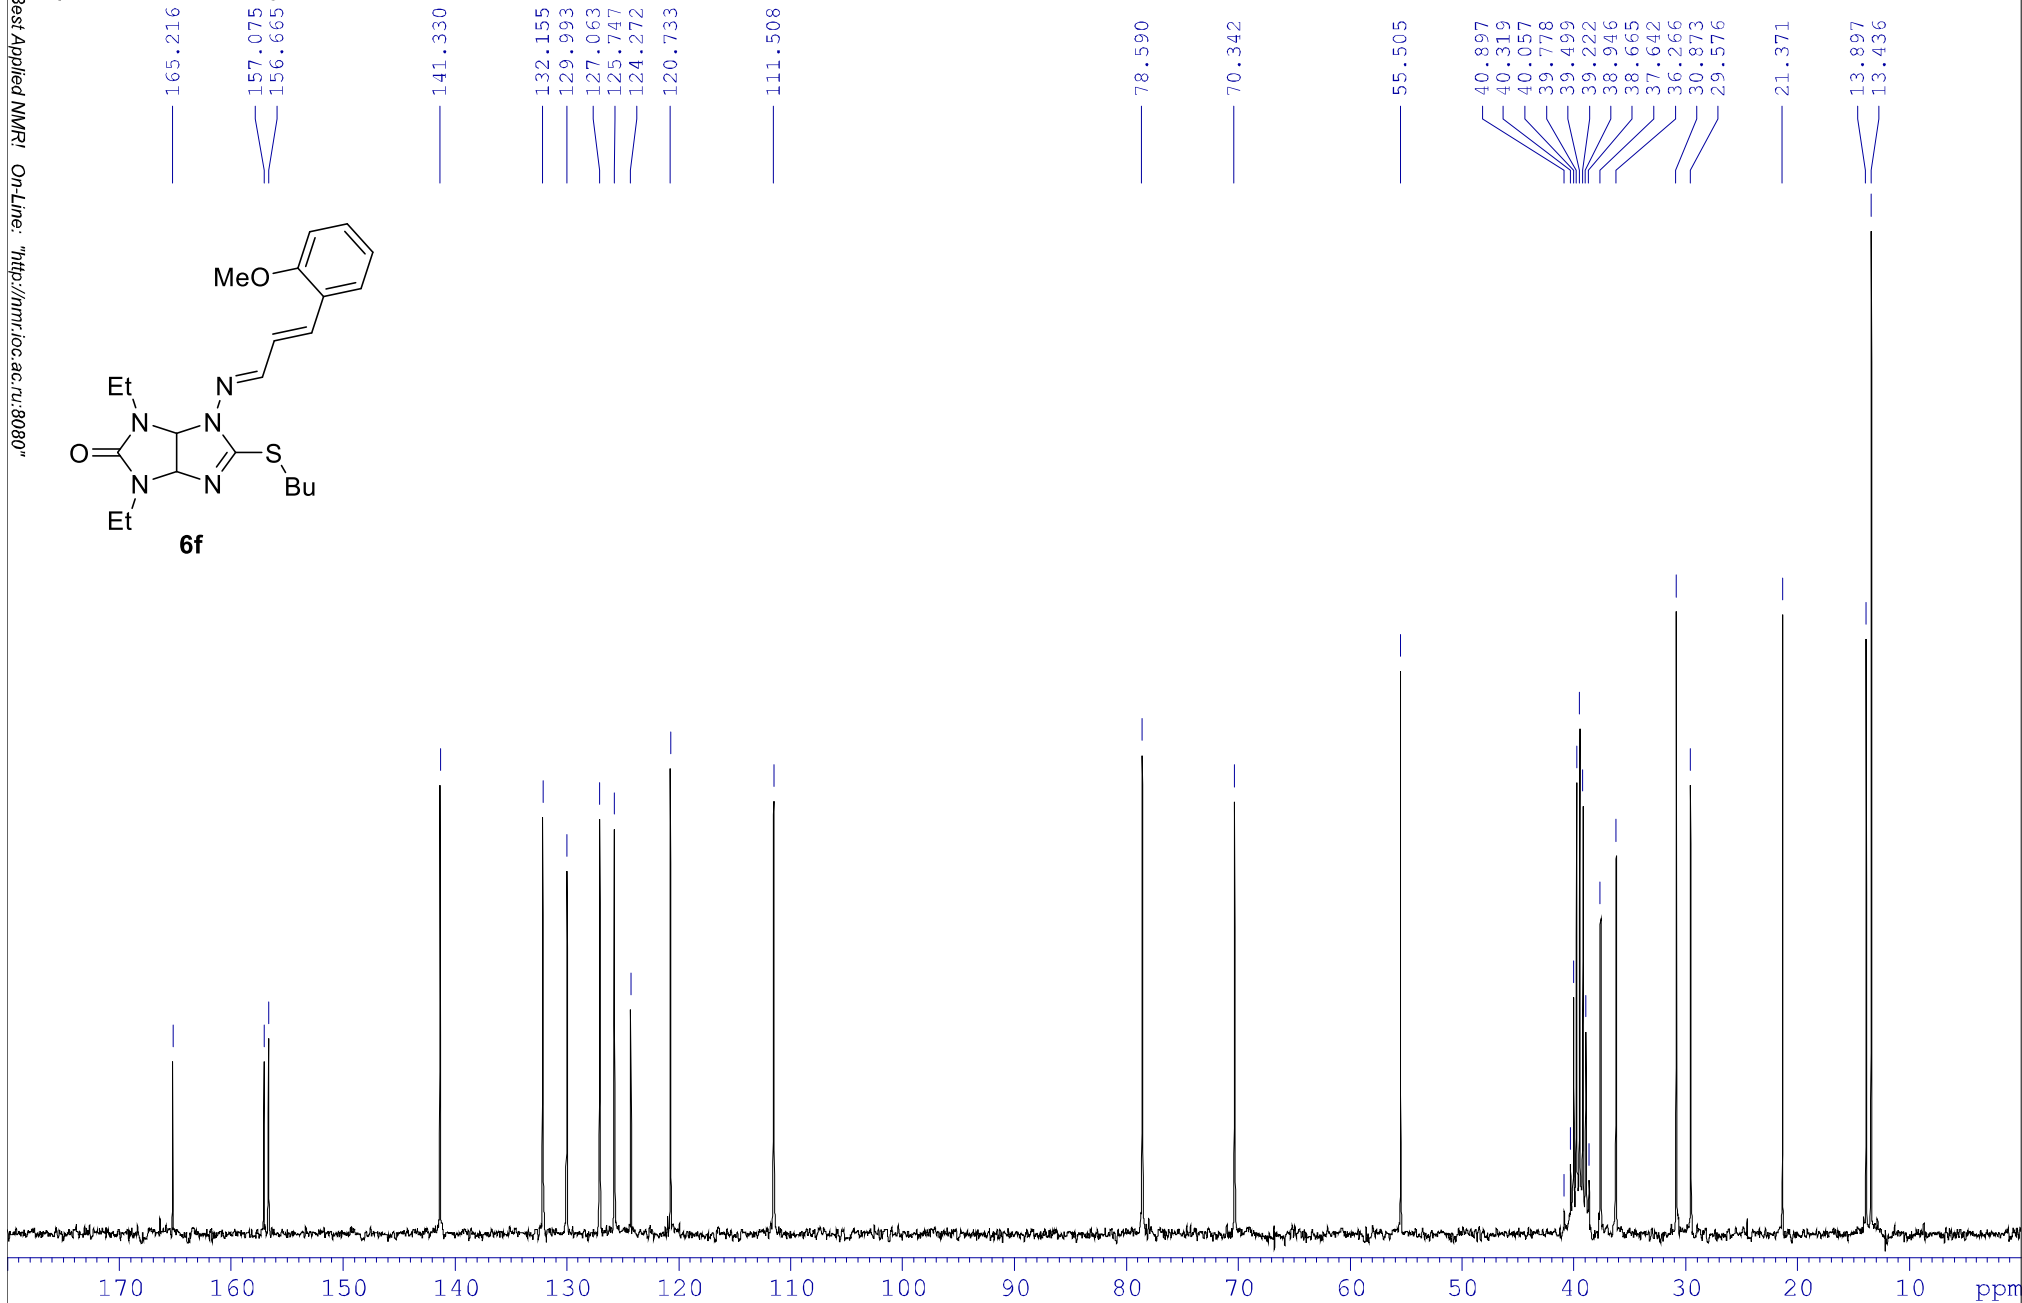

/KANI VEE220.2 Gazieva-00765

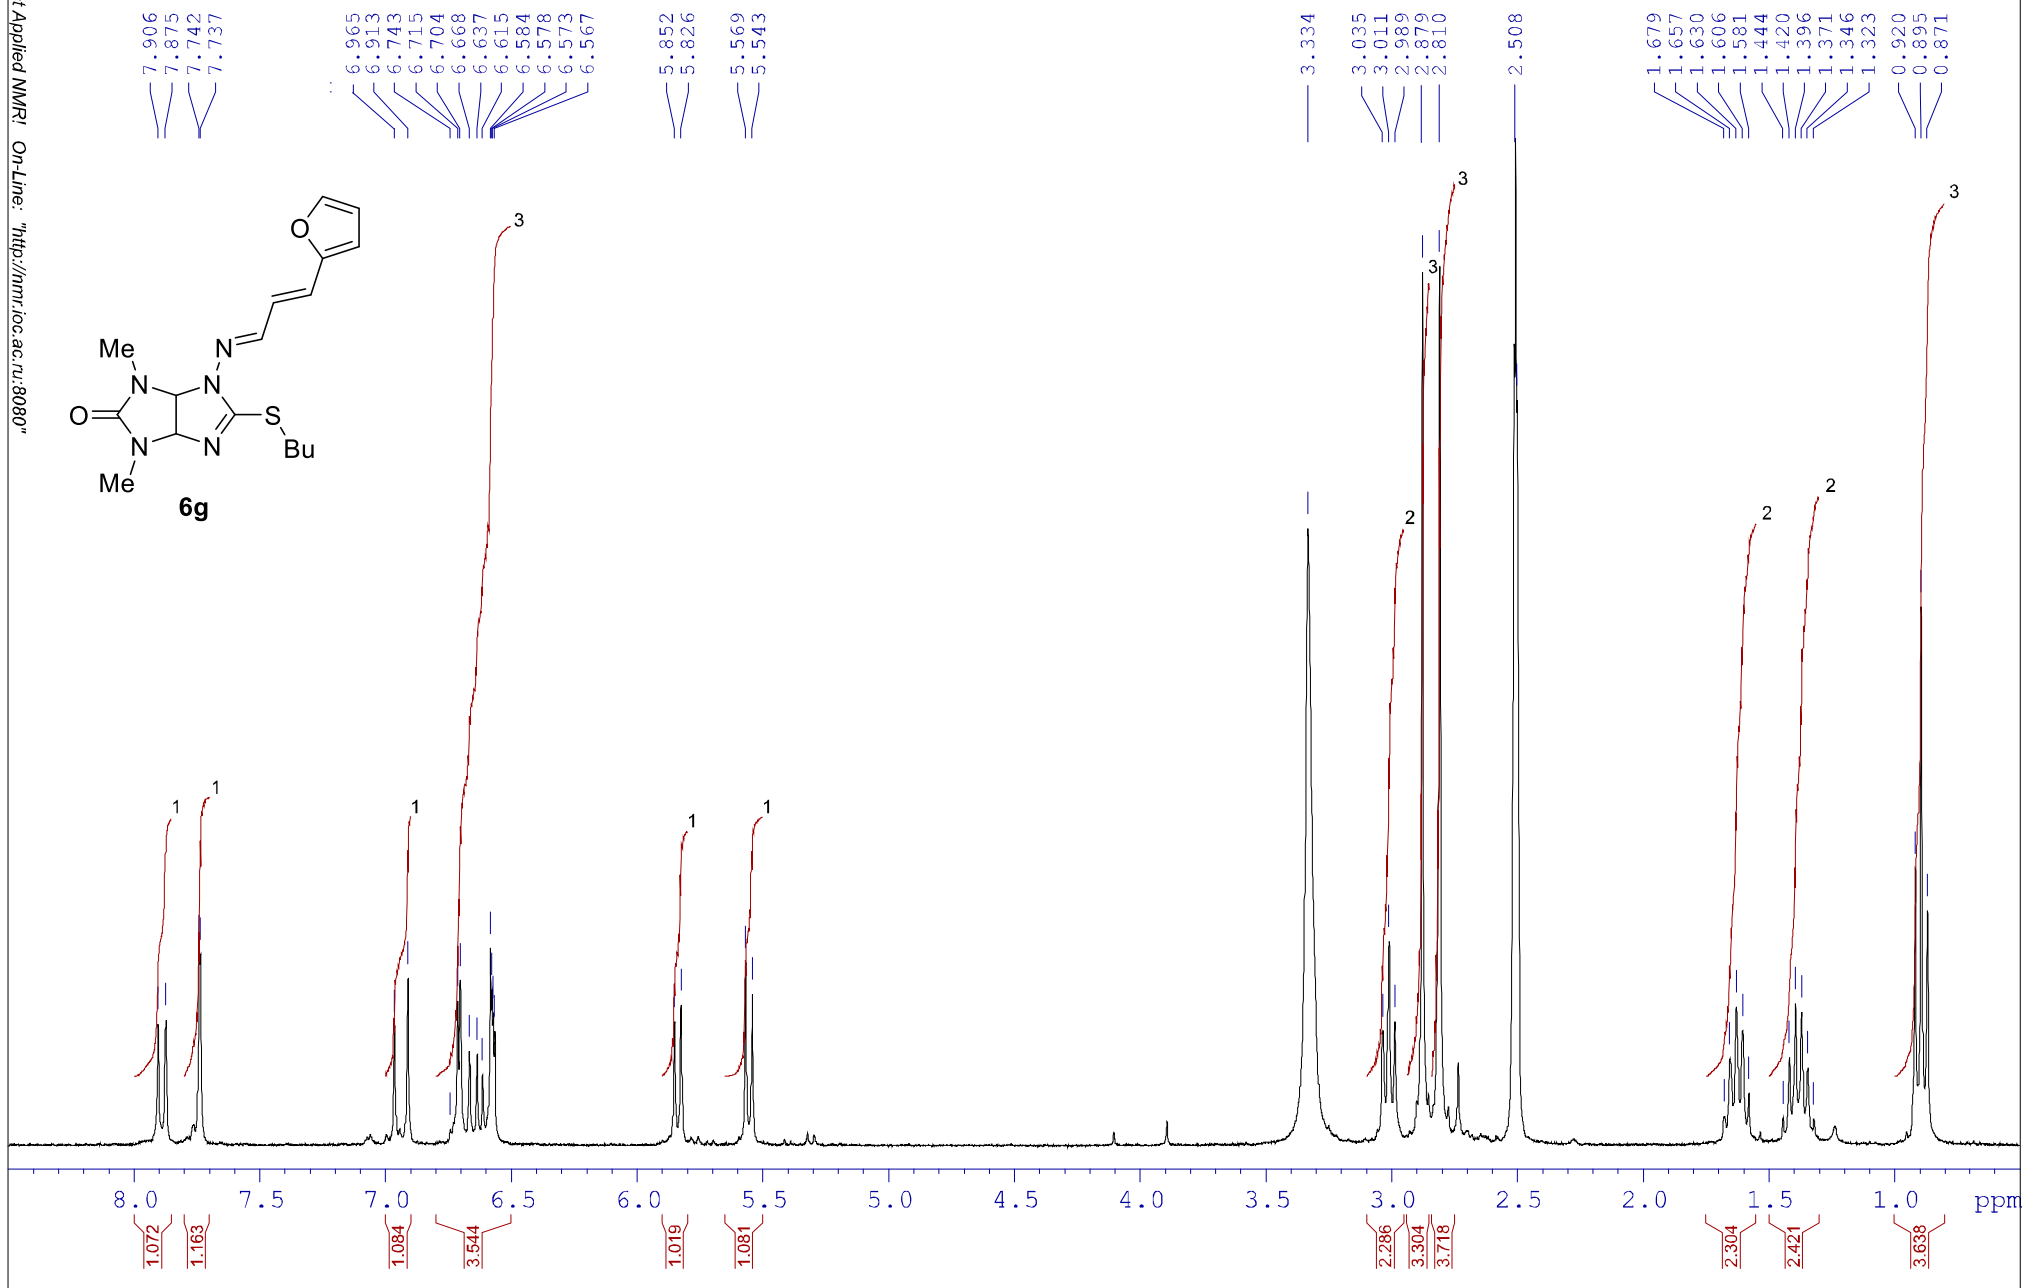

/KANI VEE220.3

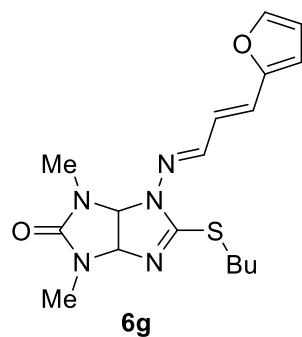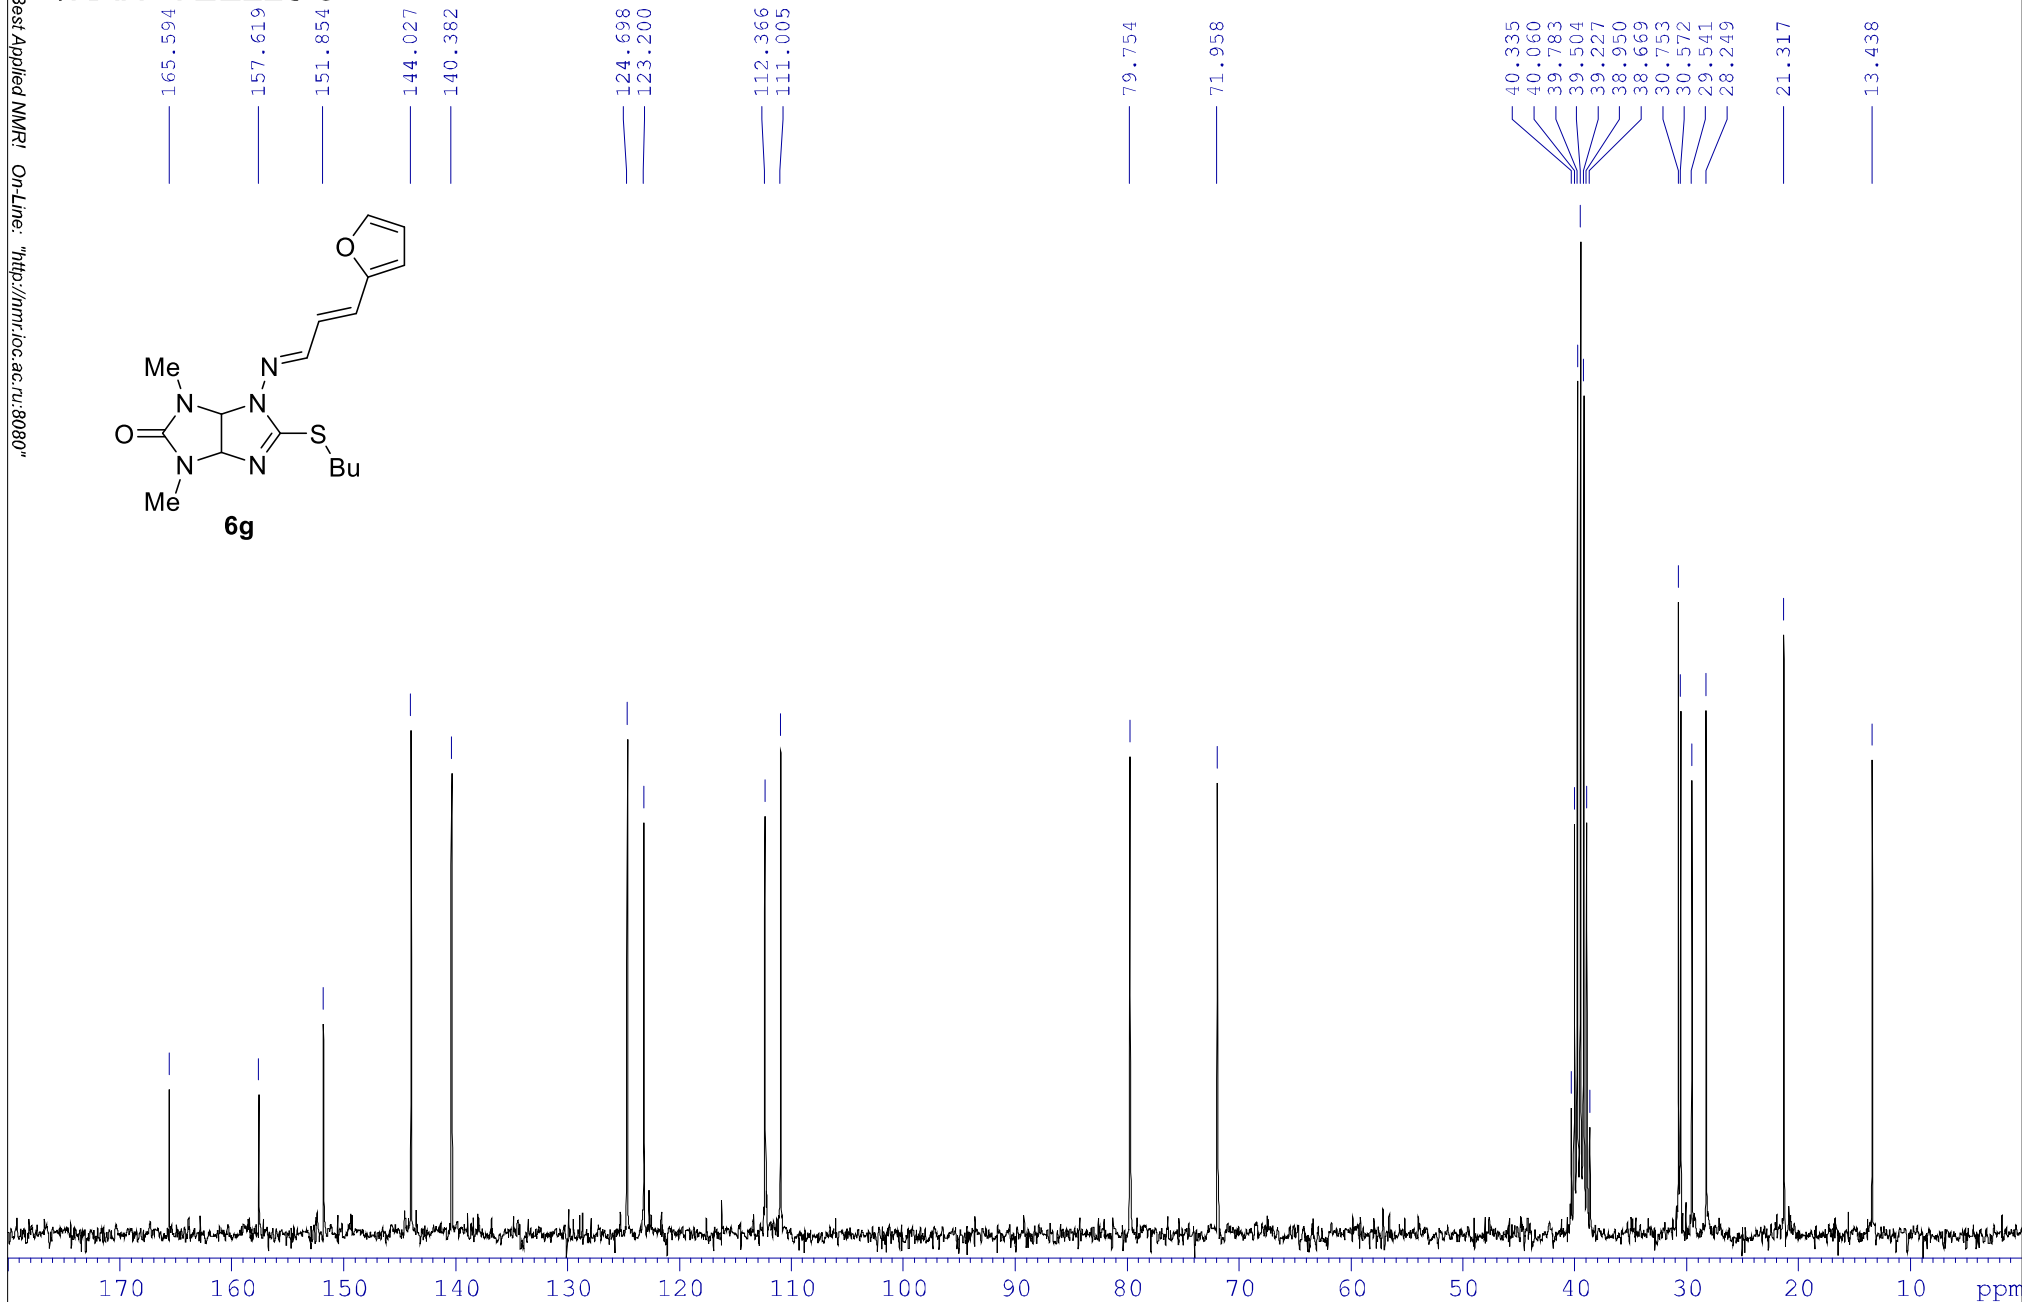

# /KANI VEE193.3

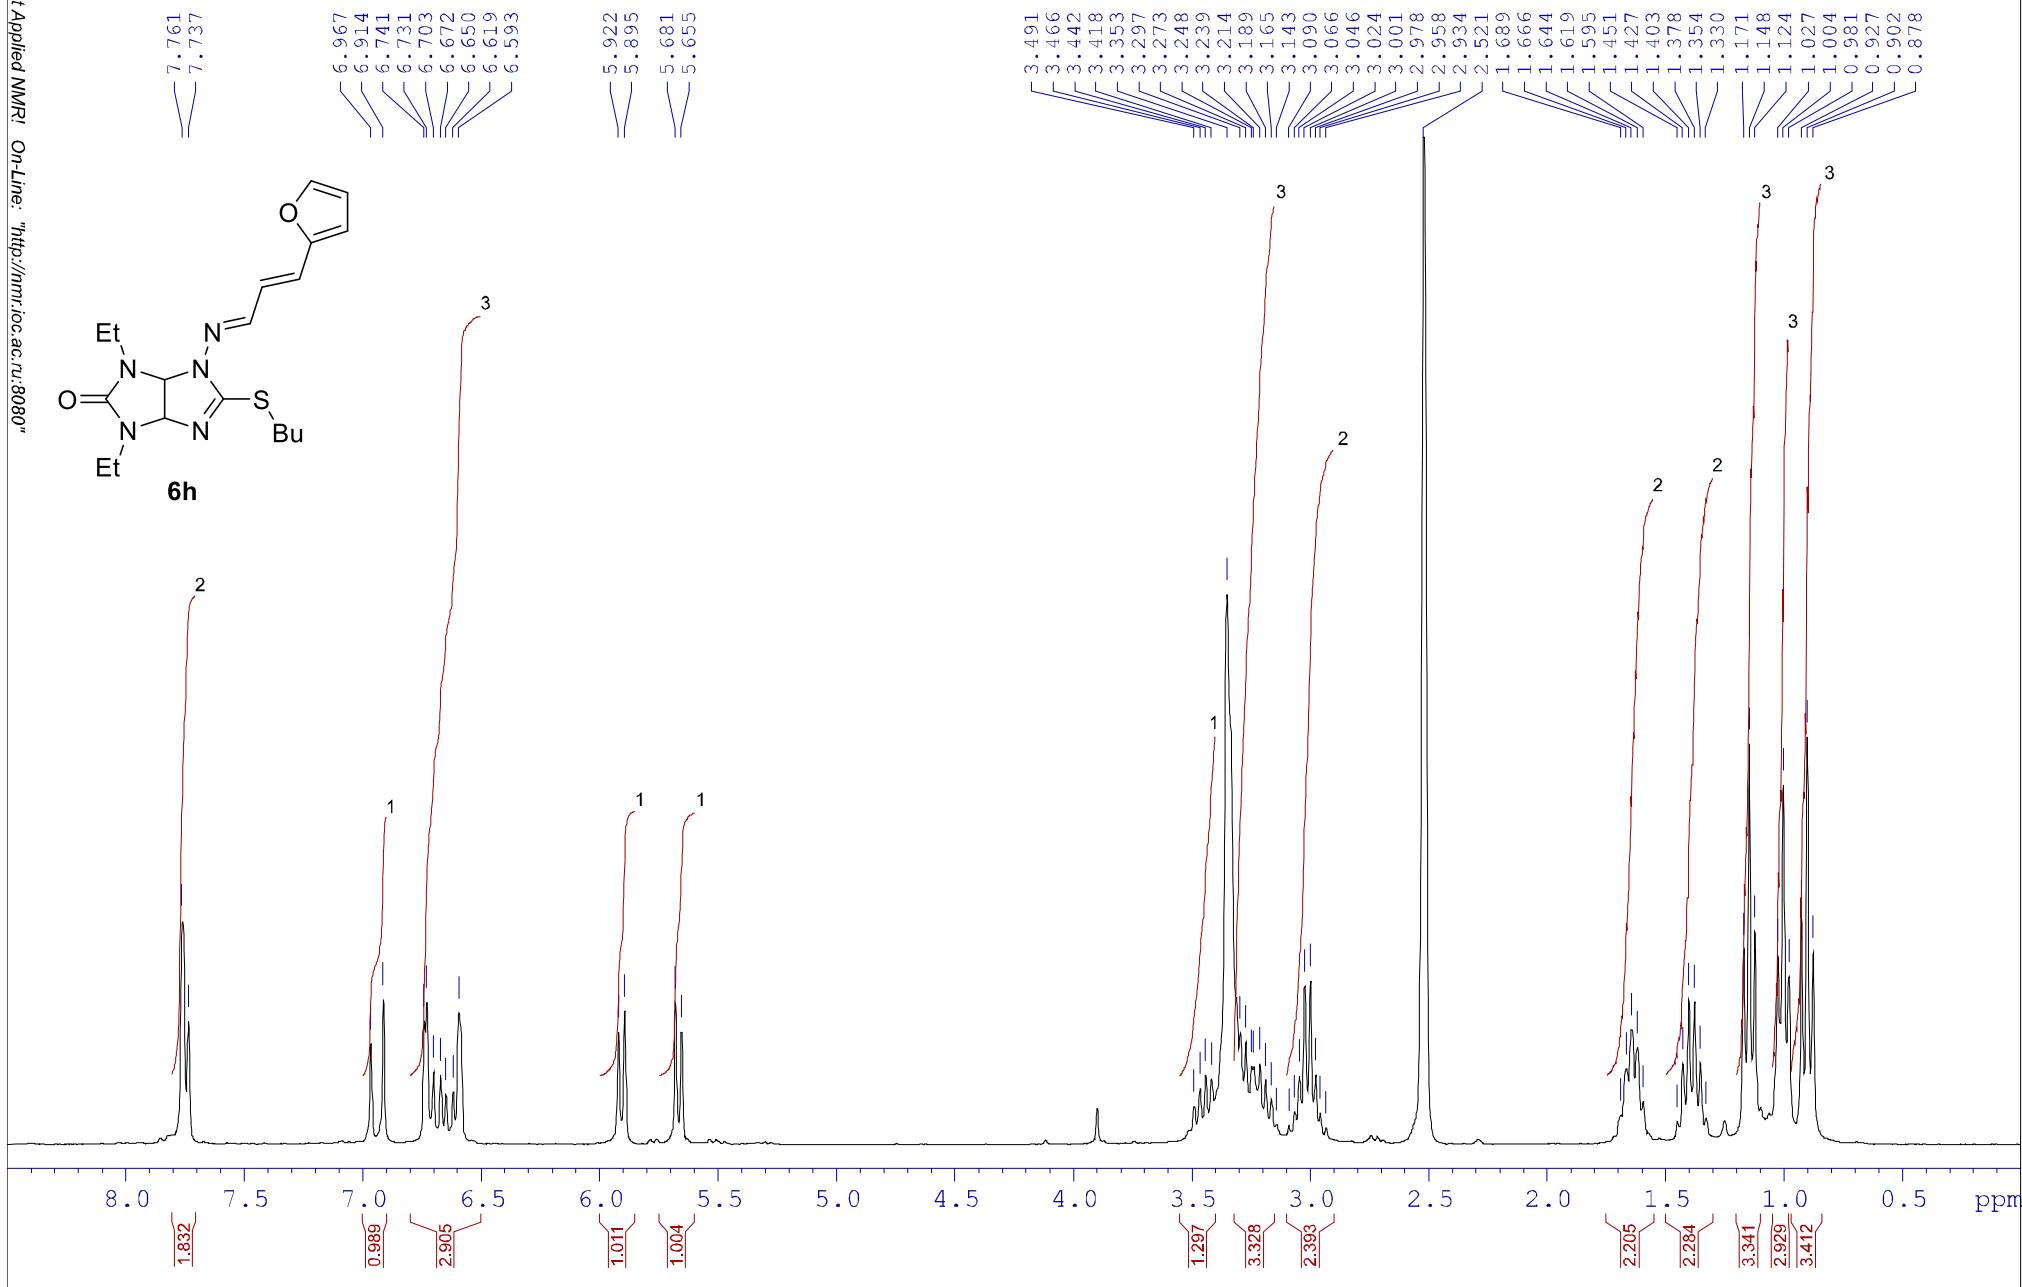



/KANI VEE193.3

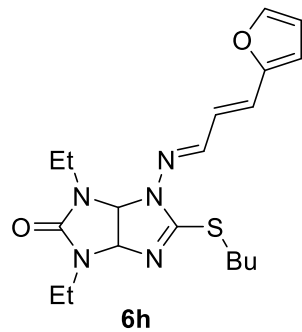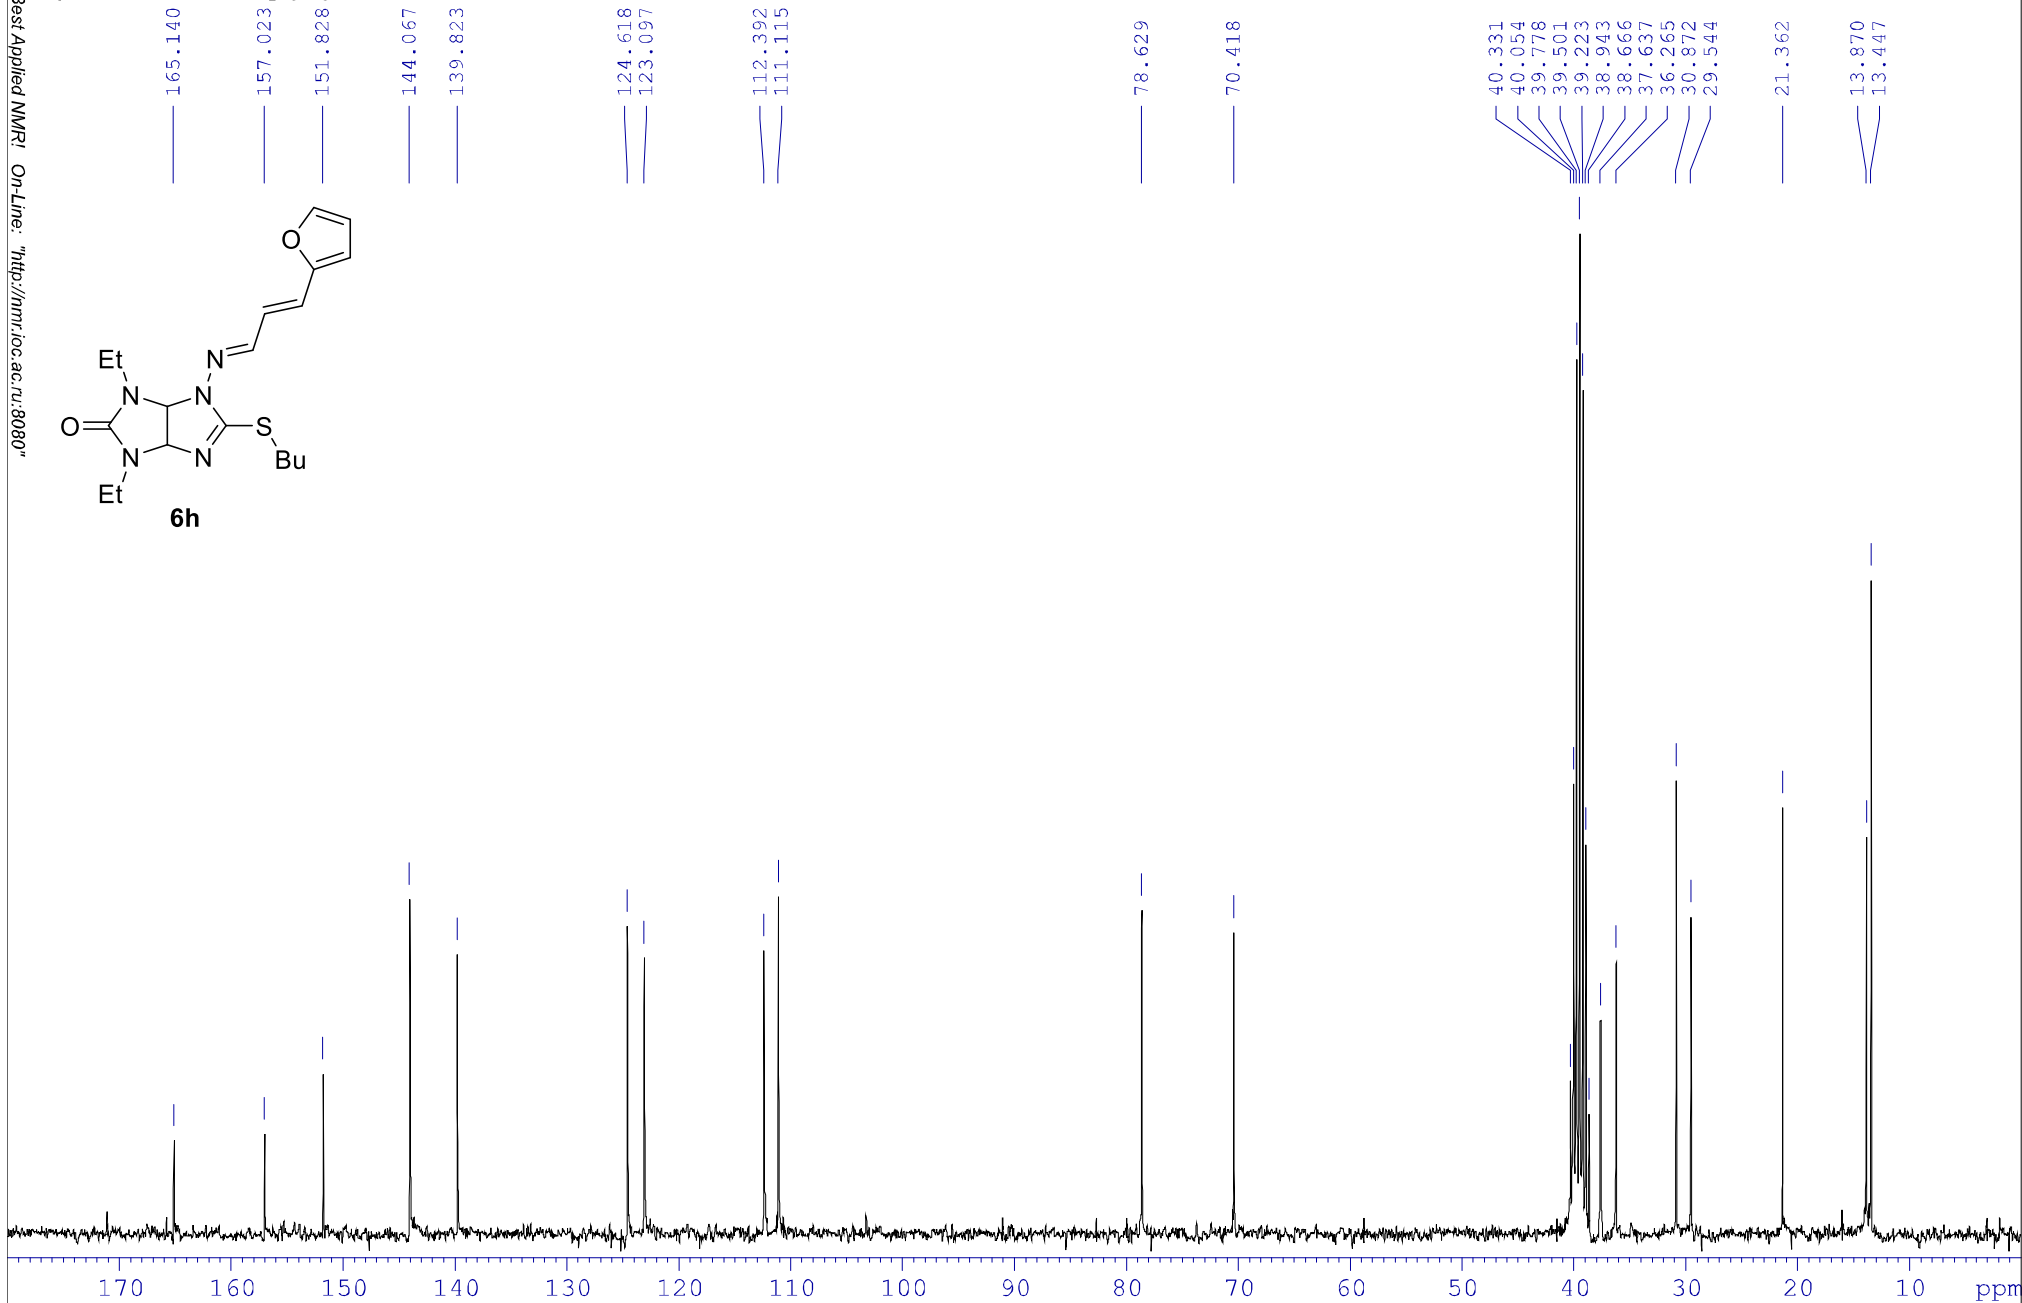

# LC-MS data of compound 4f

```

=====
Injection Date   : 20/01/2020 11:07:53          Seq. Line :   24
Sample Name     : ZNA868F1                    Location  : P1-C-11
Acq. Operator   : 4                          Inj       :    1
Acq. Instrument : Instrument 1                 Inj Volume: 3 µl
Different Inj Volume from Sequence !          Actual Inj Volume : 1 µl
Acq. Method     : C:\HPCHEM\1\METHODS\1PH.M
Last changed    : 17/01/2020 09:50:42 by 4
Analysis Method : C:\HPCHEM\1\METHODS\1PH'.M
Last changed    : 30/10/2019 14:02:01 by 4
Column: ONYX MONOLITHIC, C18 50x4.6mm |3.75ml/min| Columns Reg Valve
Gradient: "A"->@2.0min->"B" (Hold 0.6min)->@0.2min->"A"->PostRun
=====
  
```

```

Instrument Conditions :      At Start          At Stop
Pressure             :      141.7             92.3   bar
Flow                 :      3.750             3.750 ml/min
  
```

```

Detector Lamp Burn Times: Current On-Time  Accumulated On-Time
DAD 1, UV Lamp       :      1.79             73335.0   h
DAD 1, Visible Lamp  :      OFF             1040.3   h
  
```

```

Solvent Description :
PMP1, Solvent A     : 0.1%TFA, 2.5%AcN in H2O
PMP1, Solvent B     : 0.1%TFA in AcN
PMP1, Solvent C     : --NOT USED--
PMP1, Solvent D     : --NOT USED--
  
```

```

MSD parameters
Tune file name      :      C:\HPCHEM\1\1956ATUN\atunes.tun
Ionization mode     :      API-ES
  
```

```

MSD Instrument Conditions :      At Start          At Stop
Quad Temp              :      99             99   C
Gas Temp               :      350            350   C
RoughVac               :      2              2   Torr
HighVac                :      6.4E-006       6.4E-006 Torr
CapCur                :      39             588   nA
ChamCur               :      9.8E-001       2.0E-001 µA
DryingGas              :      11             11   l/min
Neb Pres               :      50             50   psig
TurbolSpd              :      100            101   %
TurbolPwr              :      105            108   W
RF Drive               :      0.0E-001       0.0E-001 %
Qd TpDrv               :      8              8   %
Gas TpDrv              :      35             35   %
Neb PrDrv              :      48             48   %
Gas FlDrv              :      63             64   %
DelaySens              :      -9.9E-002      0.0E-001 V
Aux Input              :      0.0E-001       0.0E-001 V
Other Det              :      0.0E-001       0.0E-001 V
  
```

## MSD tuning (calibration) parameters

```

Ionization polarity   :      Positive
Skim1                 :      Not Applicable
Skim2                 :      8.0 V
Ion Energy            :      5.0 V
Lens1                 :      1.7 V
Lens2                 :      17 V
Iris                  :      -200 V
HED                   :      10000 V
Width Gain            :      -627
Width Offset          :      Variable
  
```

```

Mass      :      Value
-----
118.08    :      -58
622.03    :      -58
922.01    :      -58
-----
  
```

```

Mass Gain             :      -74.95
Mass Offset           :      0.608
Quad DC               :      0.00 V
Octopole Peak         :      650 V
Octopole Knee         :      Not Applicable
  
```

Lens2DC : Not Applicable  
 L2RFEn : Not Applicable  
 L2RFPPh : Not Applicable  
 L2RFAmp : Not Applicable  
 Mass Filter : Gaussian  
 Mass Filter Width : 0.30 Da  
 Time Filter : Gaussian  
 Time Filter Width : 0.030 minutes

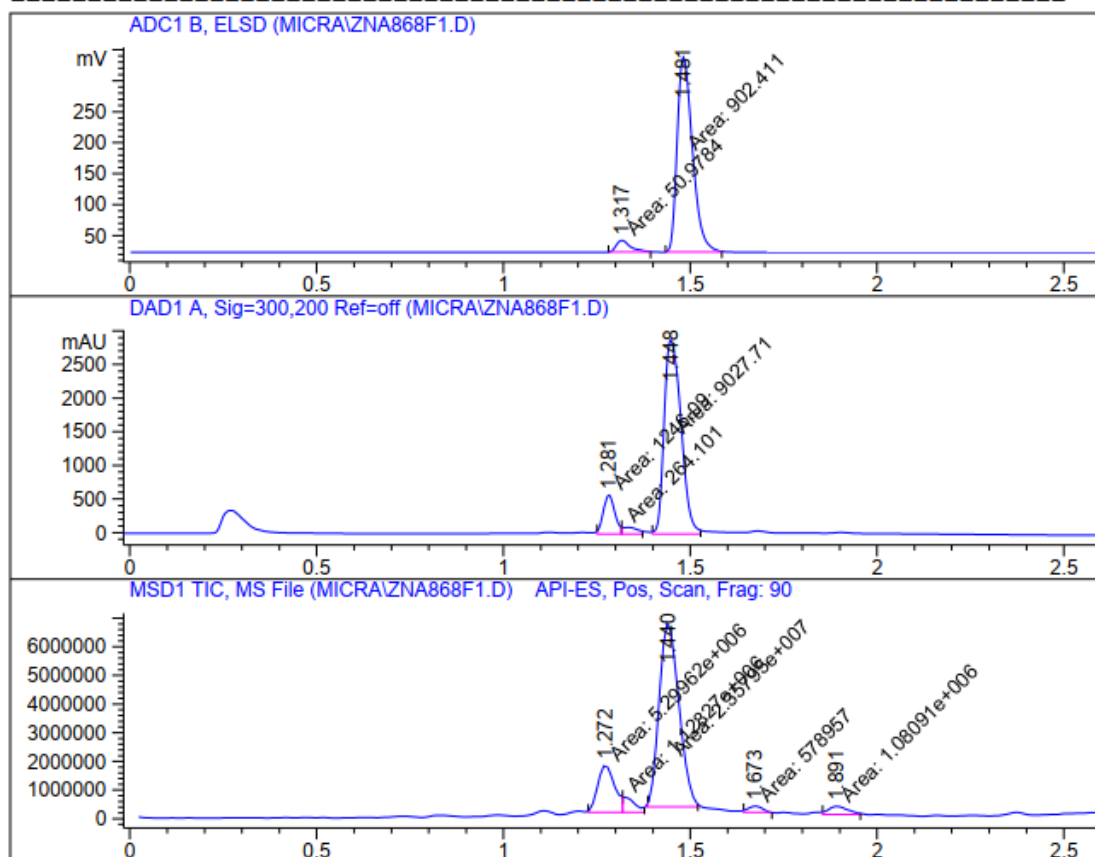

=====

Area Percent Report

=====

Sorted By : Signal  
 Multiplier : 1.0000  
 Dilution : 1.0000  
 Use Multiplier & Dilution Factor with ISTDs

Signal 1: ADC1 B, ELSD

| Peak # | RetTime [min] | Type | Width [min] | Area [mV*s] | Height [mV] | Area %  |
|--------|---------------|------|-------------|-------------|-------------|---------|
| 1      | 1.317         | MM   | 0.0446      | 50.97838    | 19.05589    | 5.3471  |
| 2      | 1.481         | MM   | 0.0477      | 902.41071   | 315.13181   | 94.6529 |

Totals : 953.38909 334.18770

Signal 2: DAD1 A, Sig=300,200 Ref=off

| Peak # | RetTime [min] | Type | Width [min] | Area [mAU*s] | Height [mAU] | Area %  |
|--------|---------------|------|-------------|--------------|--------------|---------|
| 1      | 1.281         | MM   | 0.0356      | 1246.09180   | 583.36029    | 11.8249 |
| 2      | 1.316         | MM   | 0.0390      | 264.10107    | 99.33130     | 2.5062  |
| 3      | 1.448         | MM   | 0.0518      | 9027.70703   | 2906.34717   | 85.6689 |

Totals : 1.05379e4 3589.03876

Signal 3: MSD1 TIC, MS File

| Peak<br># | RetTime<br>[min] | Type | Width<br>[min] | Area      | Height    | Area<br>% |
|-----------|------------------|------|----------------|-----------|-----------|-----------|
| 1         | 1.272            | MM   | 0.0531         | 5.29962e6 | 1.66350e6 | 16.7353   |
| 2         | 1.318            | MM   | 0.0348         | 1.12827e6 | 5.40972e5 | 3.5629    |
| 3         | 1.440            | MM   | 0.0605         | 2.35795e7 | 6.49316e6 | 74.4602   |
| 4         | 1.673            | MM   | 0.0427         | 5.78957e5 | 2.25952e5 | 1.8283    |
| 5         | 1.891            | MM   | 0.0596         | 1.08091e6 | 3.02501e5 | 3.4133    |

Totals :                      3.16672e7   9.22609e6

=====

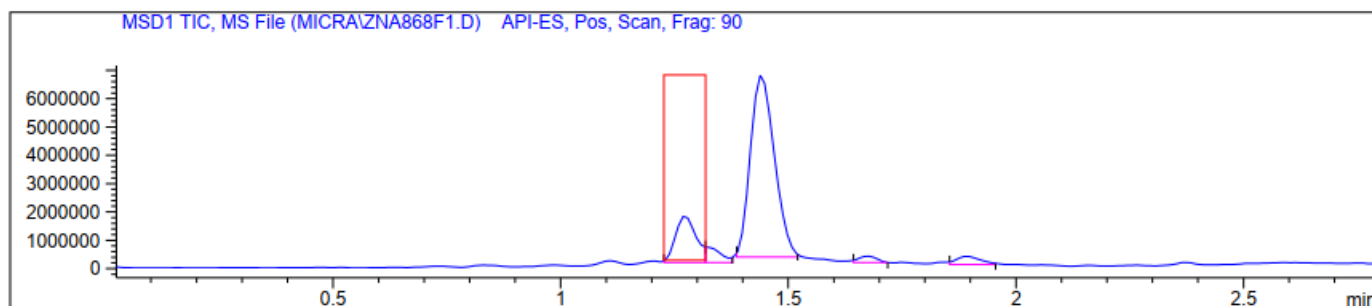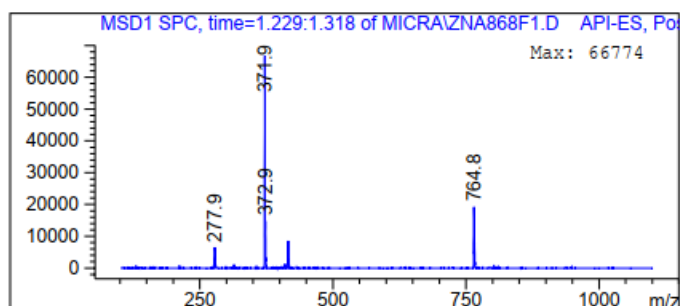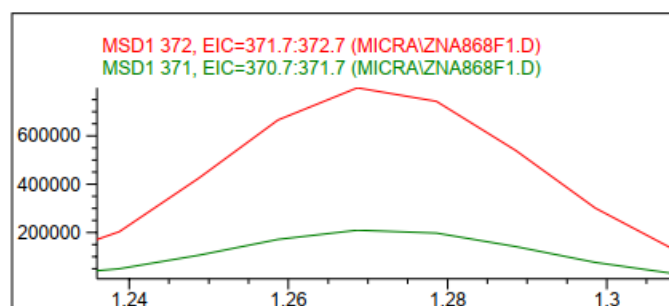

Peak #1 at 1.272 min ( 1.227 to 1.318 min)

-> The analysis found only one component, indicating a pure peak. <-

Component 1: Peak at Scan 126.4. Top ions are 372 371 765

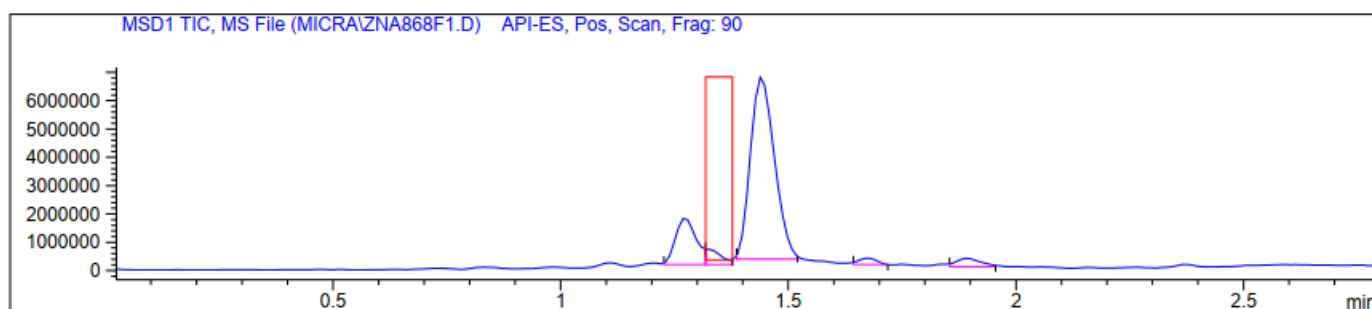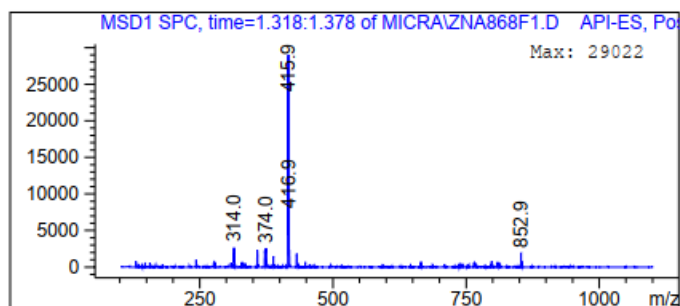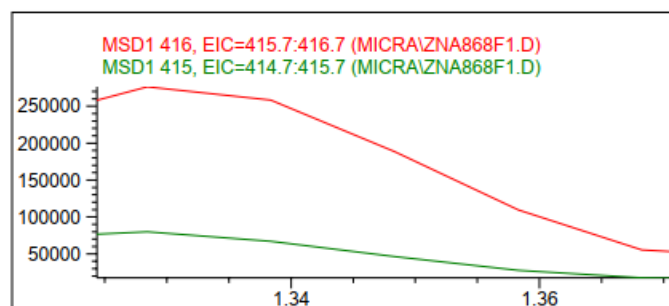

Peak #2 at 1.318 min ( 1.318 to 1.377 min)

-> The analysis found only one component, indicating a pure peak. <-

Component 1: Peak at Scan 132.0. Top ions are 416 415 417

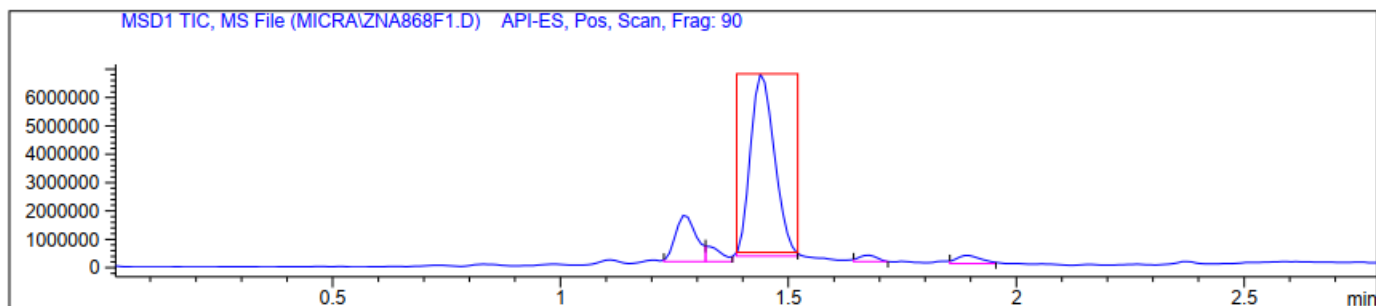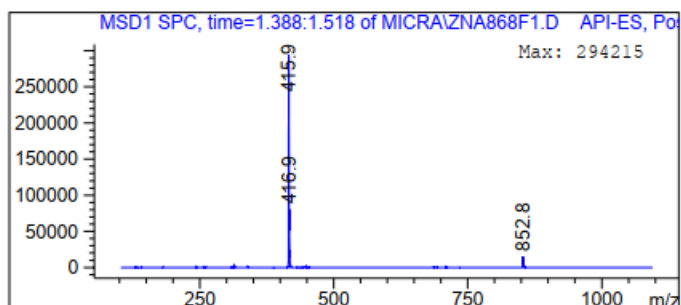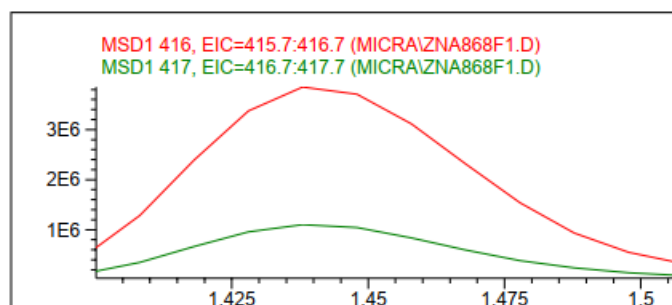

Peak #3 at 1.440 min ( 1.387 to 1.521 min)

-> The analysis found only one component, indicating a pure peak. <-

Component 1: Peak at Scan 143.3. Top ions are 416 417 415

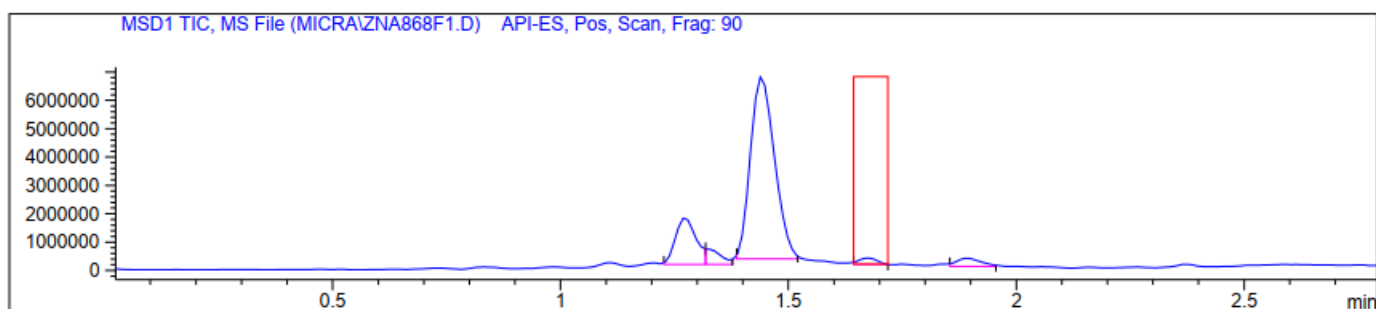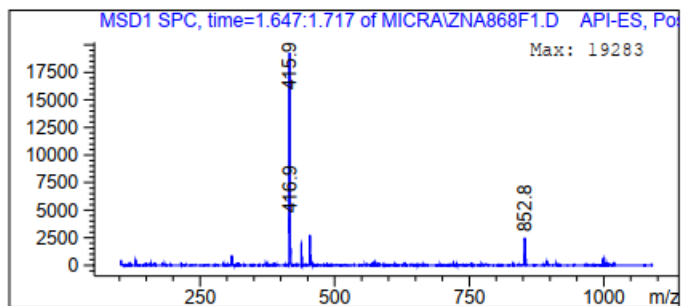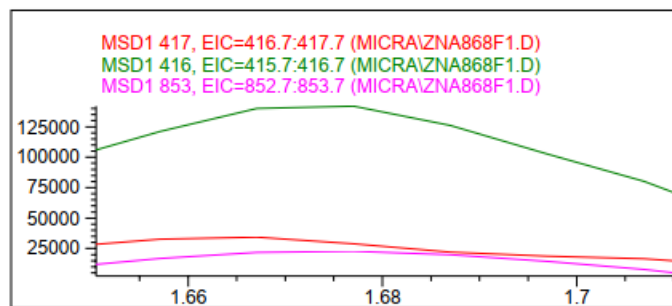

Peak #4 at 1.673 min ( 1.643 to 1.718 min)

-> The analysis found 2 components, indicating an impure peak. <-

Component 1: Peak at Scan 165.7. Top ions are 417

Component 2: Peak at Scan 166.7. Top ions are 416 853 454

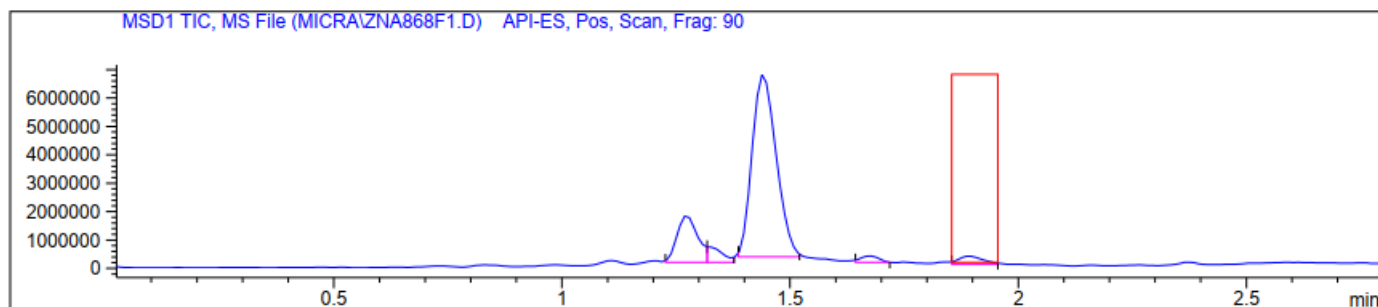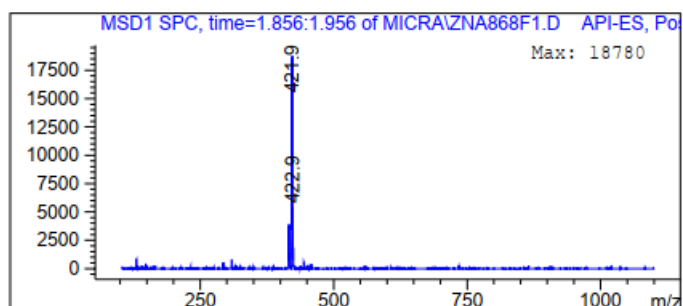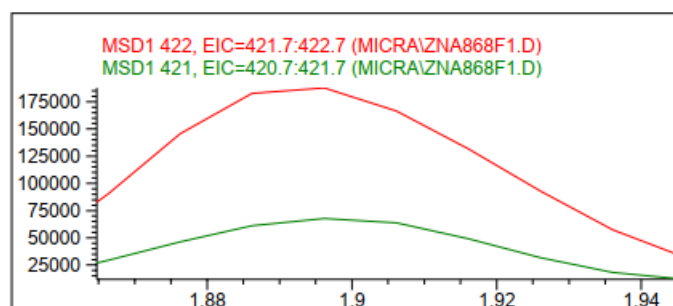

Peak #5 at 1.891 min ( 1.855 to 1.956 min)

-> The analysis found only one component, indicating a pure peak. <-

Component 1: Peak at Scan 188.9. Top ions are 422 421 423

\*\*\* End of Report \*\*\*

Anticancer Screening Data of 60 Cancer Cell Lines of **4b**
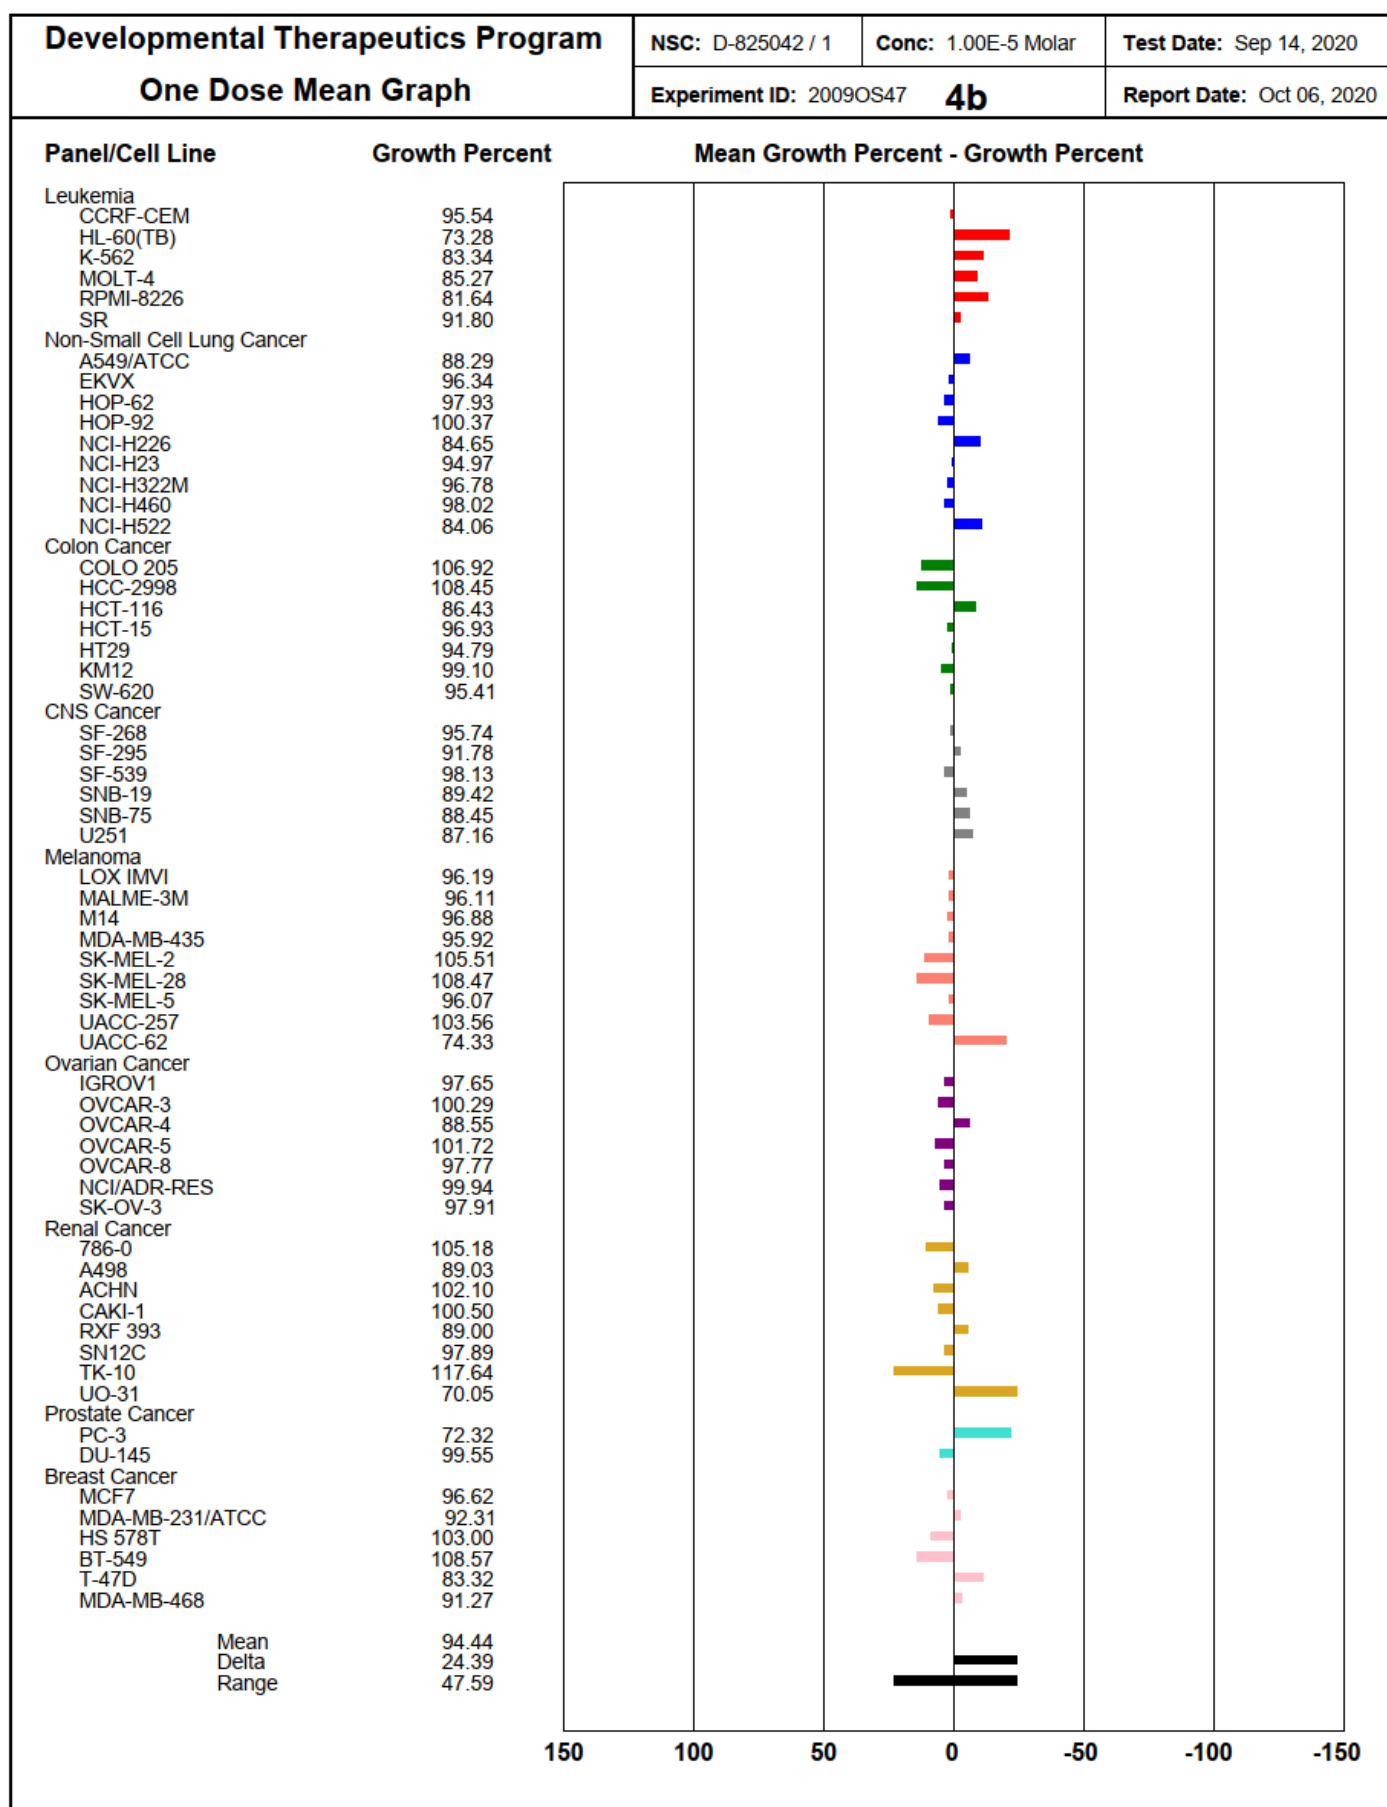



Anticancer Screening Data of 60 Cancer Cell Lines of **5d**
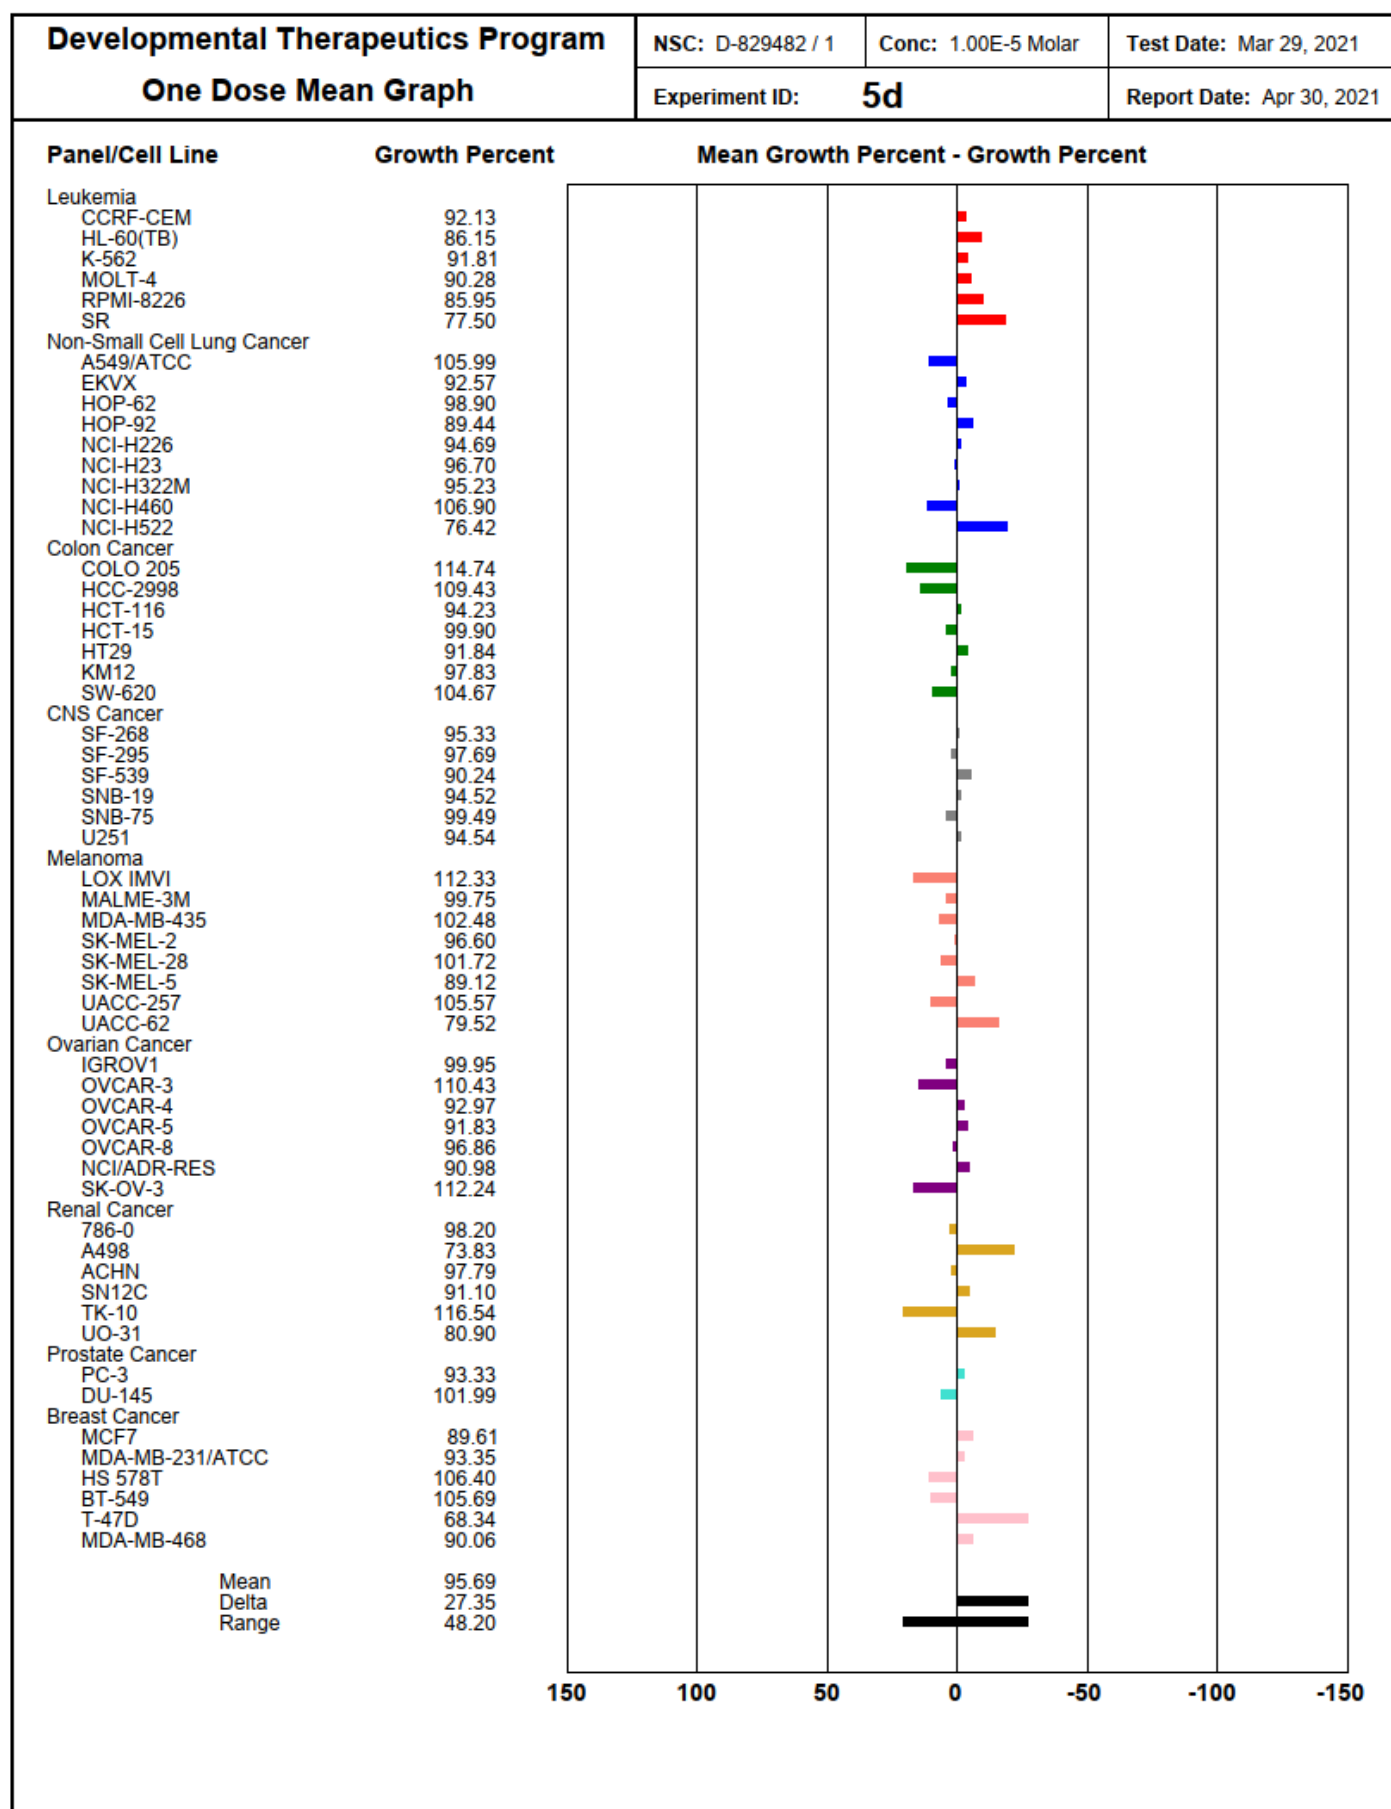

## Anticancer Screening Data of 60 Cancer Cell Lines of 5e

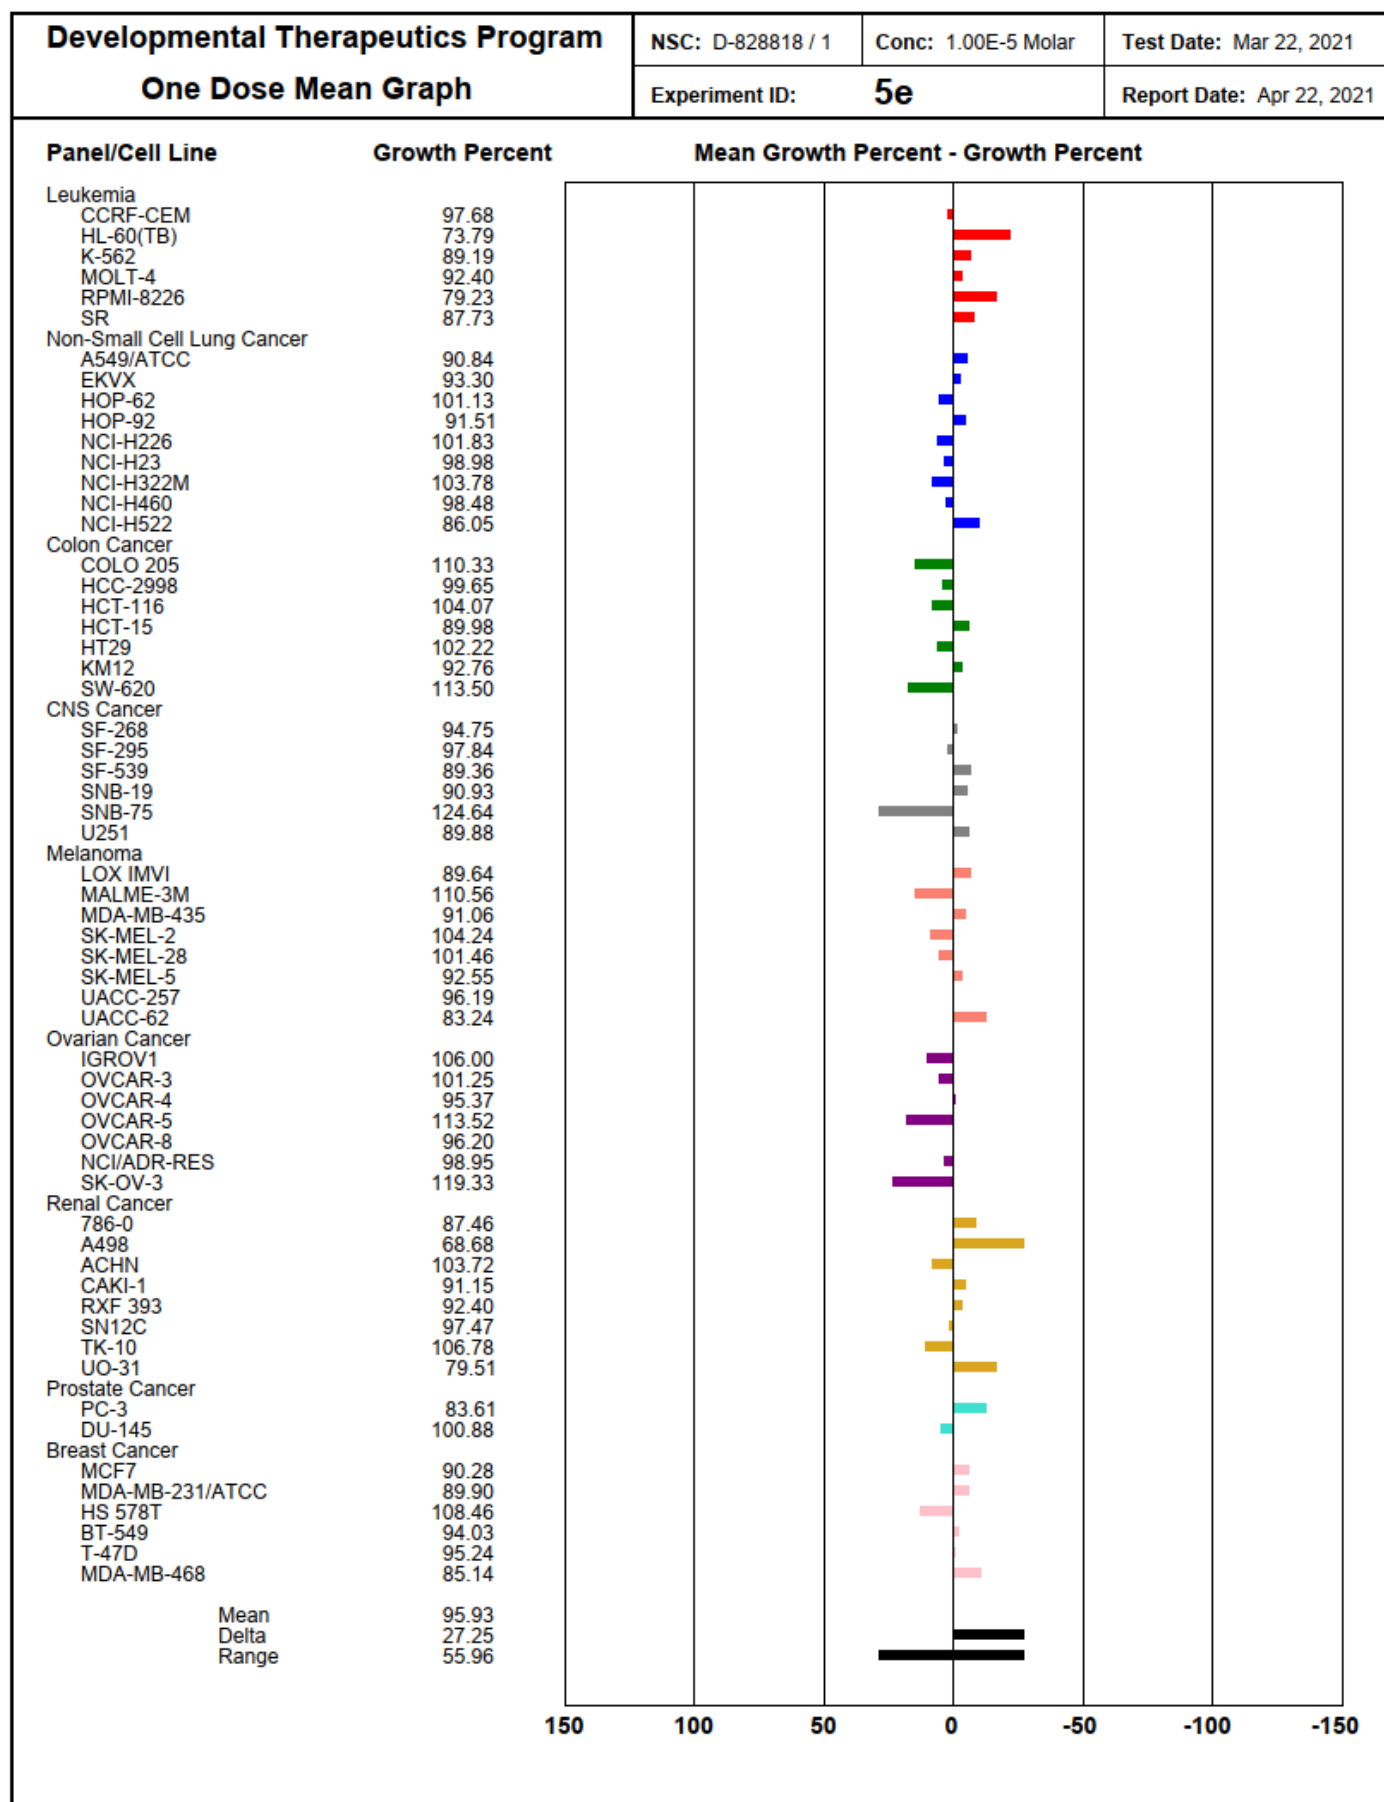

Anticancer Screening Data of 60 Cancer Cell Lines of **5f**
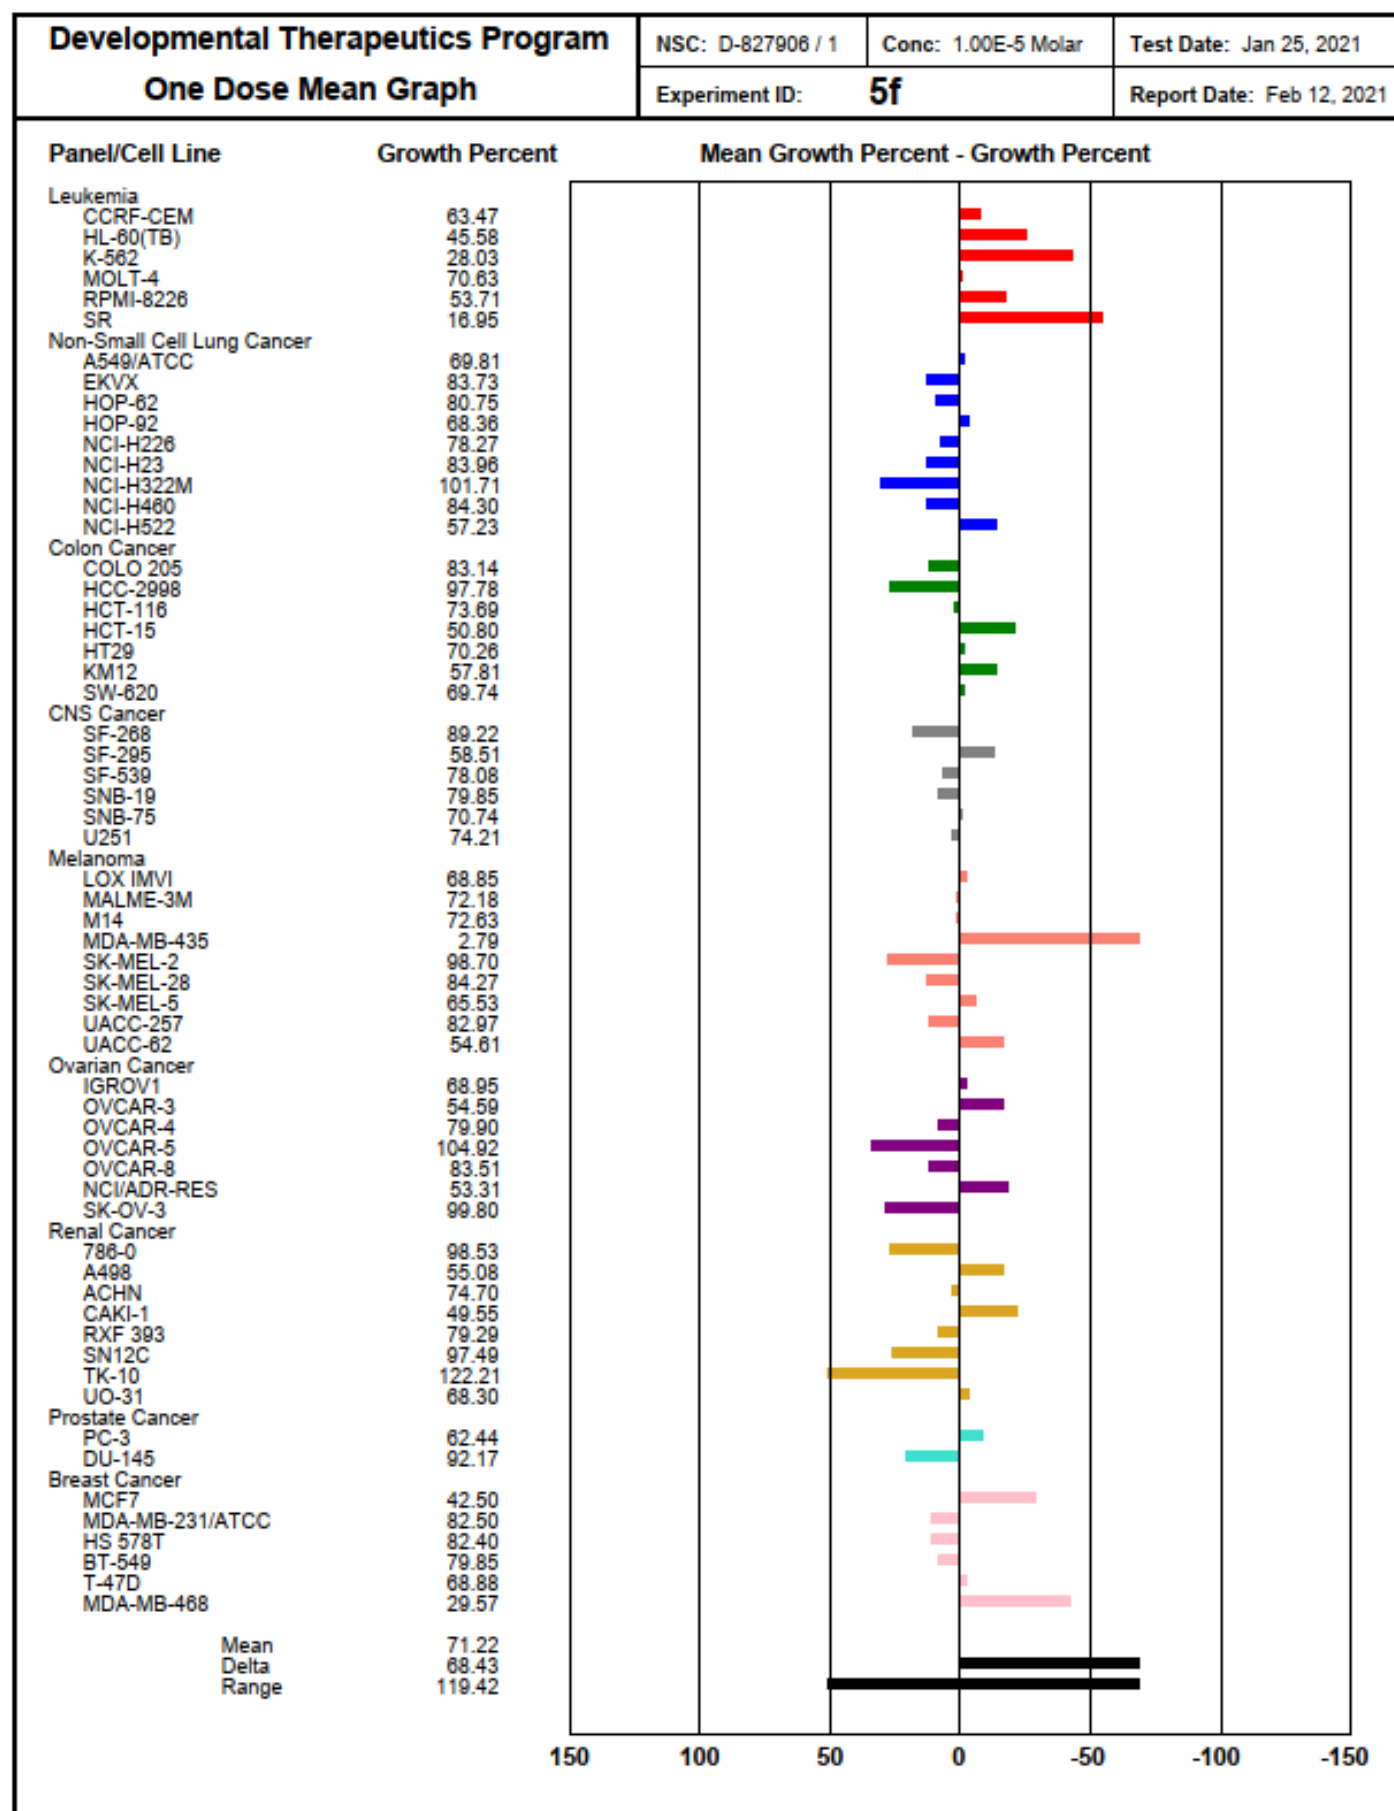

Supplement: s1 [file s1]
